# Supplementary material for: Synthesis of Bis-Glyoxylamide Peptidomimetics Derived from Bis-N-acetylisatins Linked at C5 by a Methylene or Oxygen Bridge
Source: MDPI journal article supplement (doi:10.3390/molecules24234343), 2019-11-27

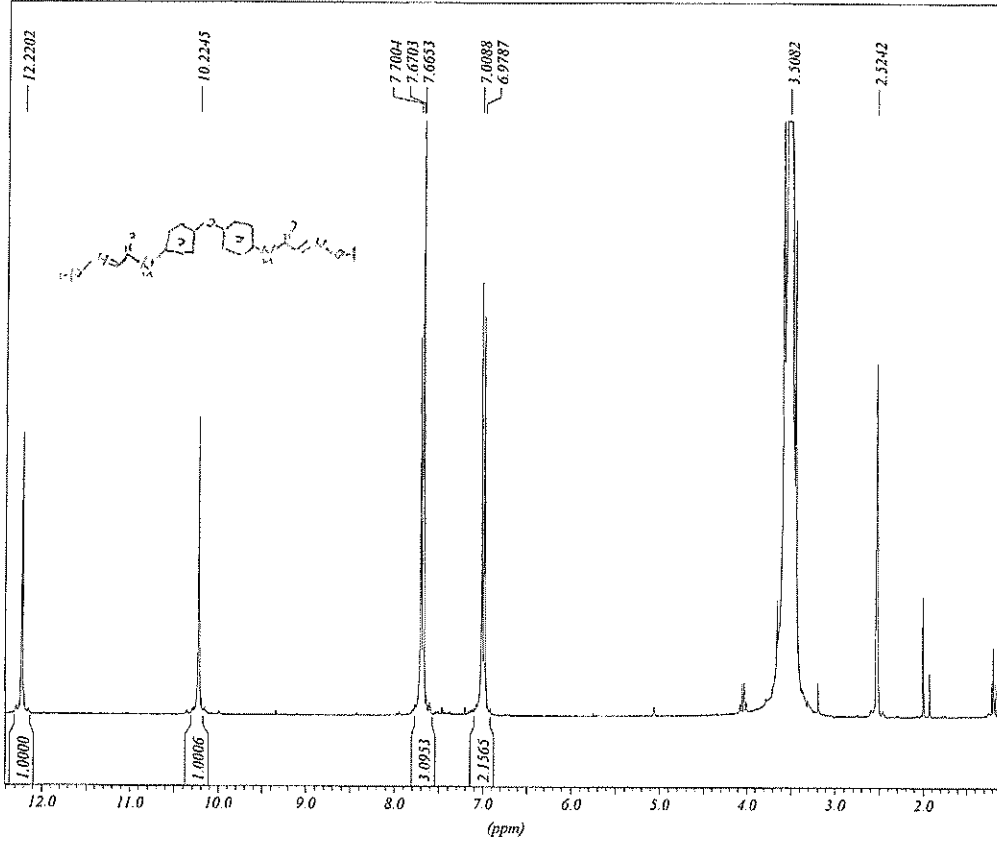

\*\*\* Current Data Parameters \*\*\*

NAME : ORP9RM-A  
 EXPNO : 10  
 PROCNO : 1

\*\*\* Acquisition Parameters \*\*\*

DATE\_t : 21.50.38  
 DATE\_d : Aug 24 2009  
 DS : 2  
 LOCNUC : 2H  
 NS : 16  
 O1 : 1853.67 Hz  
 O2 : 1853.67 Hz  
 RG : 114.000000  
 SFO1 : 300.1718537 MHz  
 SOLVENT : DMSO  
 SW : 20.5644 ppm  
 TD : 32768  
 TE : 300.2 K

\*\*\* Processing Parameters \*\*\*

LB : 0.30 Hz  
 PC : 1.00  
 SF : 300.1700000 MHz  
 SI : 16384

\*\*\* 1D NMR Plot Parameters \*\*\*

SR : -0.00 Hz  
 SOLVENT : ?

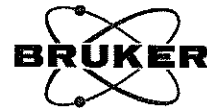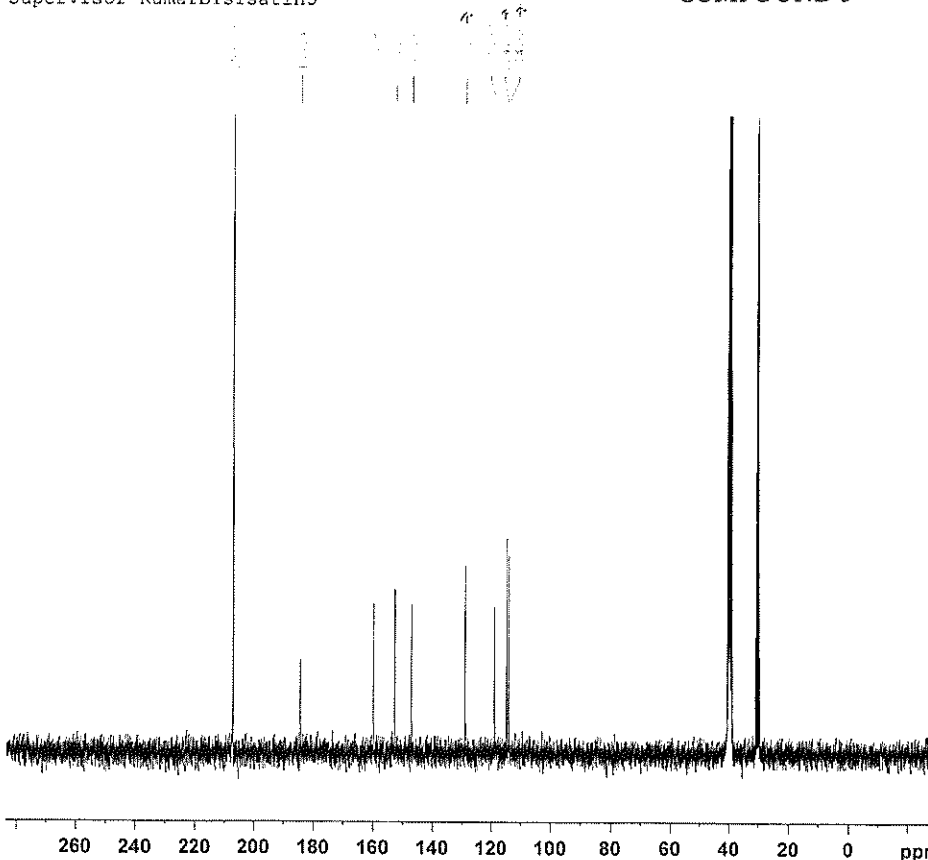

Current Data Parameters

NAME : 101208-zrn  
 EXPNO : 21  
 PROCNO : 1

F2 - Acquisition Parameters

Date\_ : 20101209  
 Time : 6.07  
 INSTRUM : dpx1  
 PROBHD : 5 mm QNP 1H/13  
 PULPROG : zgpg30  
 TD : 65536  
 SOLVENT : DMSO  
 NS : 1024  
 DS : 2  
 SWH : 23009.523 Hz  
 FIDRES : 0.363304 Hz  
 AQ : 1.3763061 sec  
 RG : 16384  
 DQ : 21.000 usec  
 DE : 25.00 usec  
 TE : 293.6 K  
 D1 : 2.0000000 sec  
 d11 : 0.0300000 sec  
 DELTA : 1.89999998 sec  
 TDO : 1

===== CHANNEL f1 =====

NUC1 : 13C  
 P1 : 7.50 usec  
 PL1 : -3.00 dB  
 SFO1 : 75.4873094 MHz

===== CHANNEL f2 =====

CPDPRG2 : waltz16  
 NUC2 : 1H  
 PCPD2 : 105.00 usec  
 PL2 : -3.00 dB  
 PL12 : 17.34 dB  
 PL13 : 23.60 dB  
 SFO2 : 300.1715008 MHz

F2 - Processing parameters

SI : 32768  
 SF : 75.4778155 MHz  
 WDW : EM  
 SSB : 0  
 LB : 1.00 Hz  
 GB : 0  
 PC : 1.40

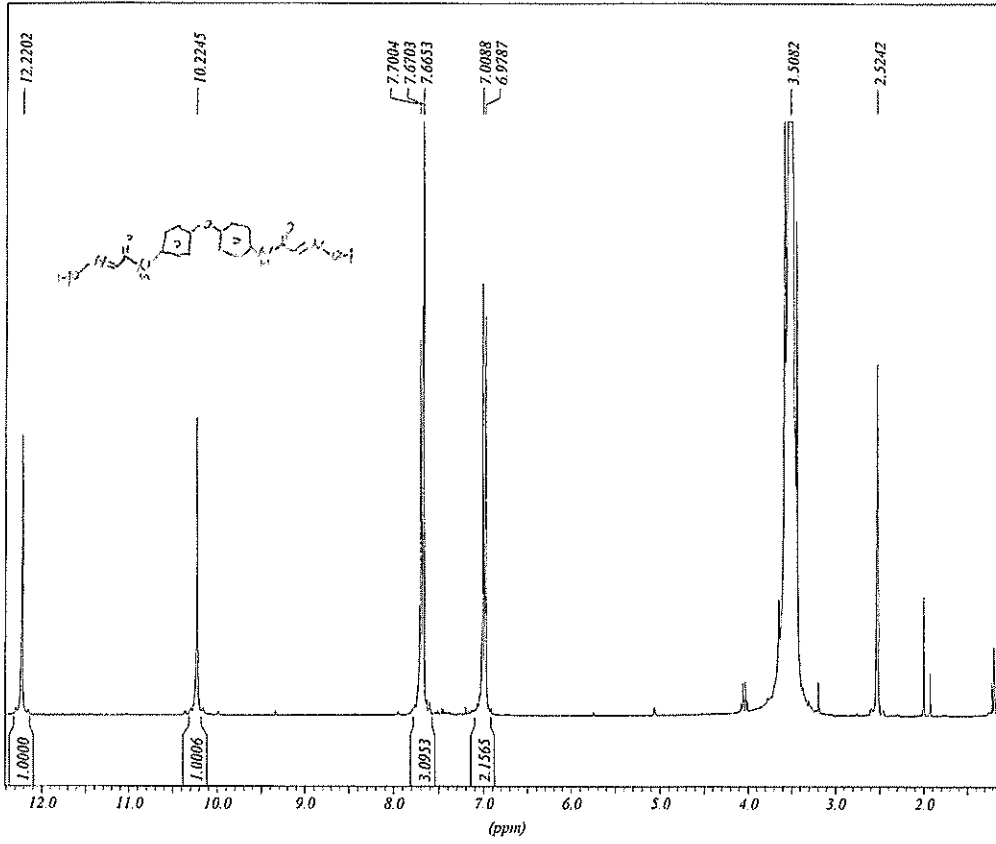

\*\*\* Current Data Parameters \*\*\*

NAME : ORP9RAI-A  
 EXPNO : 10  
 PROCNO : 1

\*\*\* Acquisition Parameters \*\*\*

DATE\_j : 21-50-38  
 DATE\_d : Aug 24 2009  
 DS : 2  
 LOCNUC : 2H  
 NS : 16  
 O1 : 1853.67 Hz  
 O2 : 1853.67 Hz  
 RG : 114.000000  
 SFO1 : 300.1718537 MHz  
 SOLVENT : DMSO  
 SW : 20.5644 ppm  
 TD : 32768  
 TE : 300.2 K

\*\*\* Processing Parameters \*\*\*

LB : 0.30 Hz  
 PC : 1.00  
 SF : 300.1700000 MHz  
 SI : 16384

\*\*\* 1D NMR Plot Parameters \*\*\*

SR : -0.00 Hz  
 SOLVENT : ?

11/9

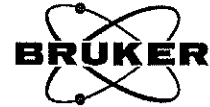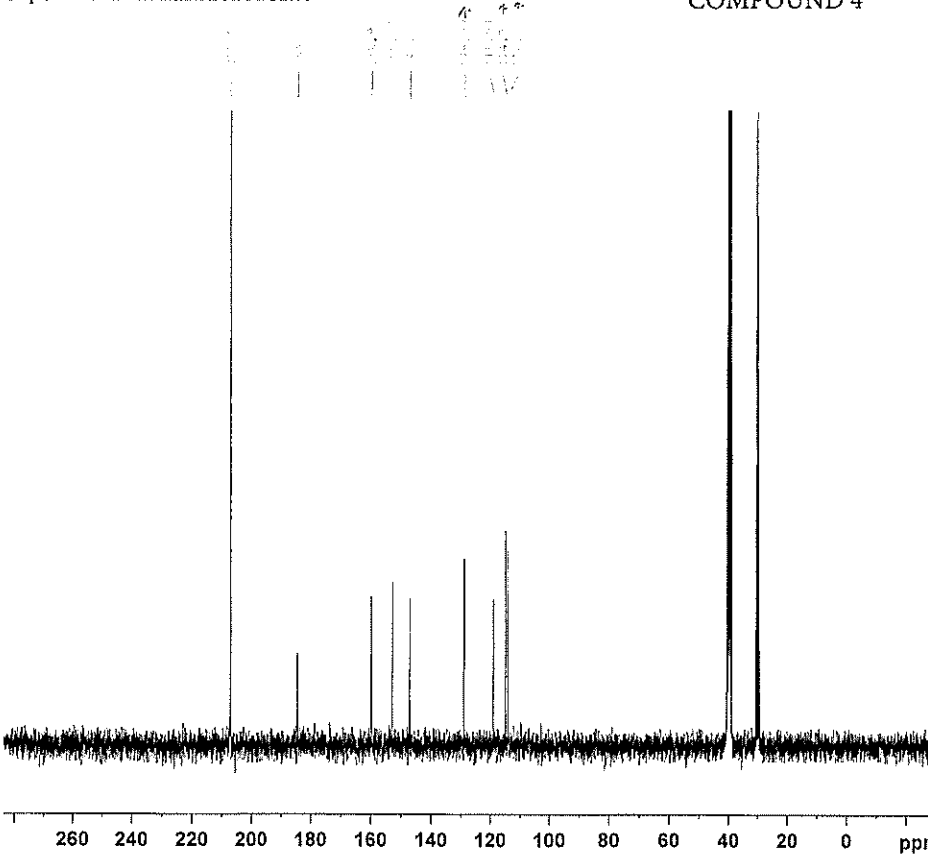

Current Data Parameters  
 NAME : 101208-zrn  
 EXPNO : 21  
 PROCNO : 1

F2 - Acquisition Parameters

Date : 20101209  
 Time : 6.07  
 INSTRUM : dpx1  
 PROBHD : 5 mm QNP 1H/13  
 PULPROG : zgpg30  
 TD : 65536  
 SOLVENT : DMSO  
 NS : 1024  
 DS : 2  
 SWH : 23009.523 Hz  
 FIDRES : 0.363304 Hz  
 AQ : 1.3763061 sec  
 RG : 16384  
 CW : 21.000 usec  
 DE : 25.00 usec  
 TE : 293.6 K  
 D1 : 2.0000000 sec  
 d11 : 0.0300000 sec  
 DELTA : 1.89999998 sec  
 TDO : 1

===== CHANNEL f1 =====  
 NUC1 : 13C  
 P1 : 7.50 usec  
 PL1 : -3.00 dB  
 SFO1 : 75.4873094 MHz

===== CHANNEL f2 =====  
 CPDPRG2 : waltz16  
 NUC2 : 1H  
 ECPD2 : 105.00 usec  
 PL2 : -3.00 dB  
 PL12 : 17.34 dB  
 PL13 : 23.60 dB  
 SFO2 : 300.1715009 MHz

F2 - Processing parameters  
 SI : 32768  
 SF : 75.4778155 MHz  
 WDW : EM  
 SSB : 0  
 LB : 1.00 Hz  
 GB : 0  
 PC : 1.40

COMPOUND 5

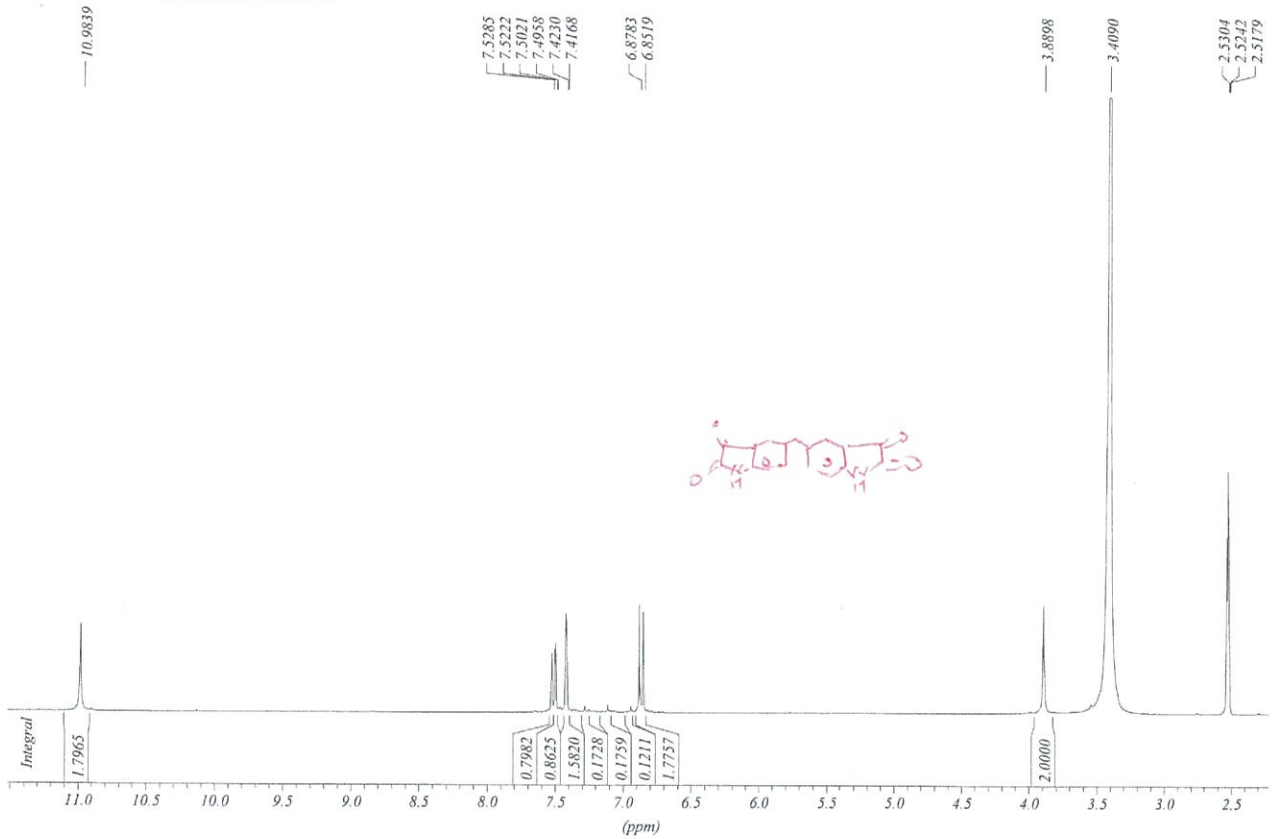

8

Supervisor Kumarbisisatin4

COMPOUND 5

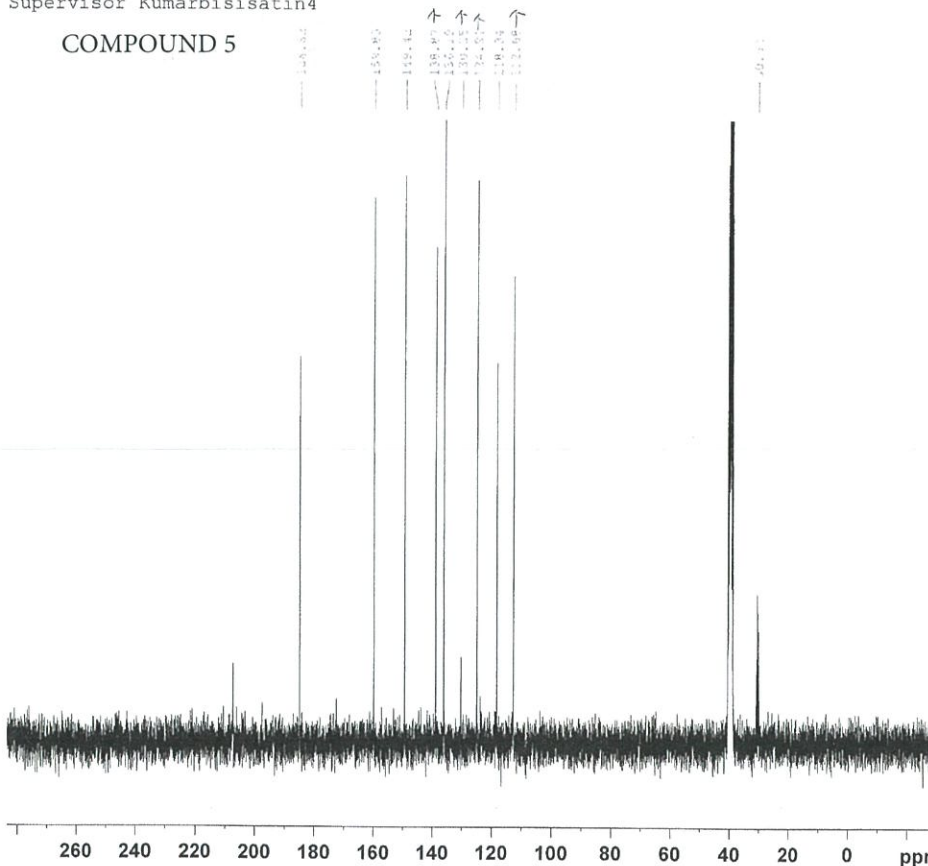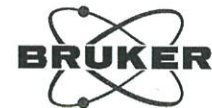

Current Data Parameters  
 NAME 101208-zrn  
 EXPNO 11  
 PROCNO 1

F2 - Acquisition Parameters  
 Date\_ 20101209  
 Time 4.46  
 INSTRUM dpx1  
 PROBHD 5 mm QNP 1H/13  
 PULPROG zgpg30  
 TD 65536  
 SOLVENT DMSO  
 NS 1024  
 DS 2  
 SWH 23809.523 Hz  
 FIDRES 0.363304 Hz  
 AQ 1.3763061 sec  
 RG 14596.5  
 DW 21.000 usec  
 DE 25.00 usec  
 TE 293.6 K  
 D1 2.00000000 sec  
 d11 0.03000000 sec  
 DELTA 1.89999998 sec  
 TDO 1

==== CHANNEL f1 =====  
 NUC1 13C  
 P1 7.50 usec  
 PL1 -3.00 dB  
 SFO1 75.4873094 MHz

==== CHANNEL f2 =====  
 CPDPRG2 waltz16  
 NUC2 1H  
 PCPD2 105.00 usec  
 PL2 -3.00 dB  
 PL12 17.34 dB  
 PL13 23.60 dB  
 SFO2 300.1715008 MHz

F2 - Processing parameters  
 SI 32768  
 SF 75.4778155 MHz  
 WDR EM  
 SSB 0  
 LB 1.00 Hz  
 GB 0  
 PC 1.40

8

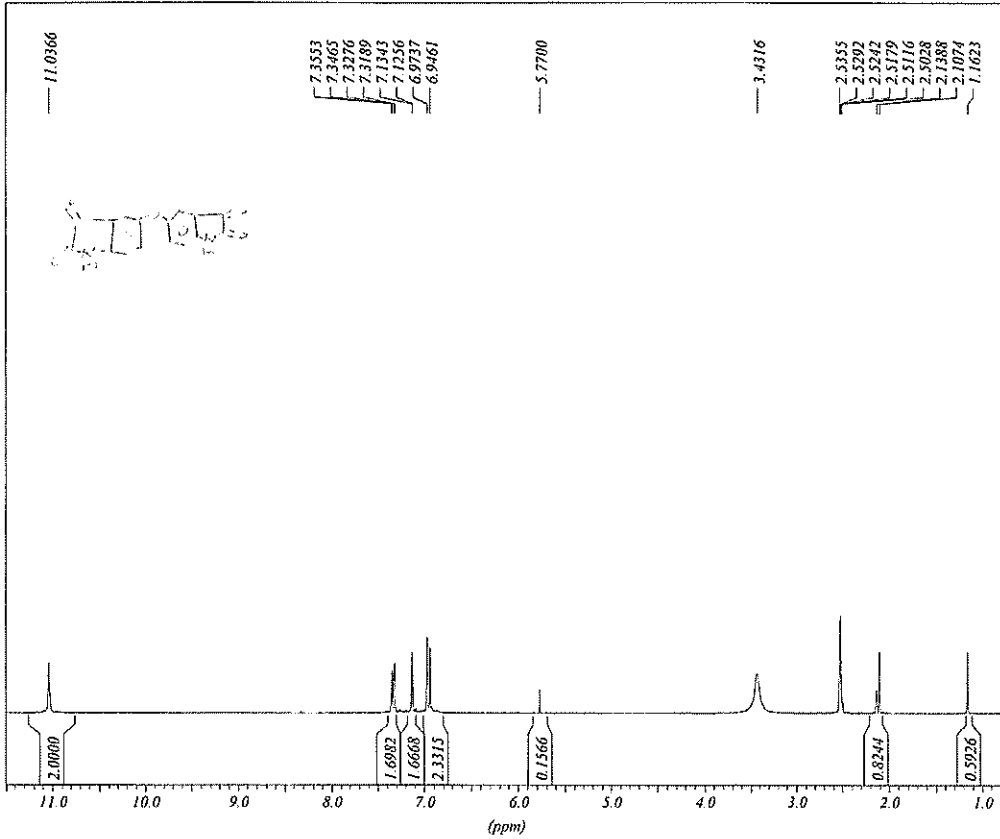

\*\*\* Current Data Parameters \*\*\*

NAME : 09PYBK-L  
 EXPNO : 60  
 PROCNO : 1

\*\*\* Acquisition Parameters \*\*\*

DATE\_1 : 08:25:11  
 DATE\_d : Sep 01 2009  
 DS : 2  
 LOCNUC : 2H  
 NS : 16  
 O1 : 1853.67 Hz  
 O2 : 1853.67 Hz  
 RG : 645.0999756  
 SFO1 : 300.1718537 MHz  
 SOLVENT : DMSO  
 SW : 20.5644 ppm  
 TD : 32768  
 TE : 300.2 K

\*\*\* Processing Parameters \*\*\*

LB : 0.30 Hz  
 PC : 1.00  
 SF : 300.1700000 MHz  
 SI : 16384

\*\*\* 1D NMR Plot Parameters \*\*\*

SR : -0.00 Hz  
 SOLVENT : ?

128

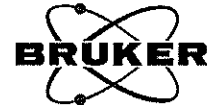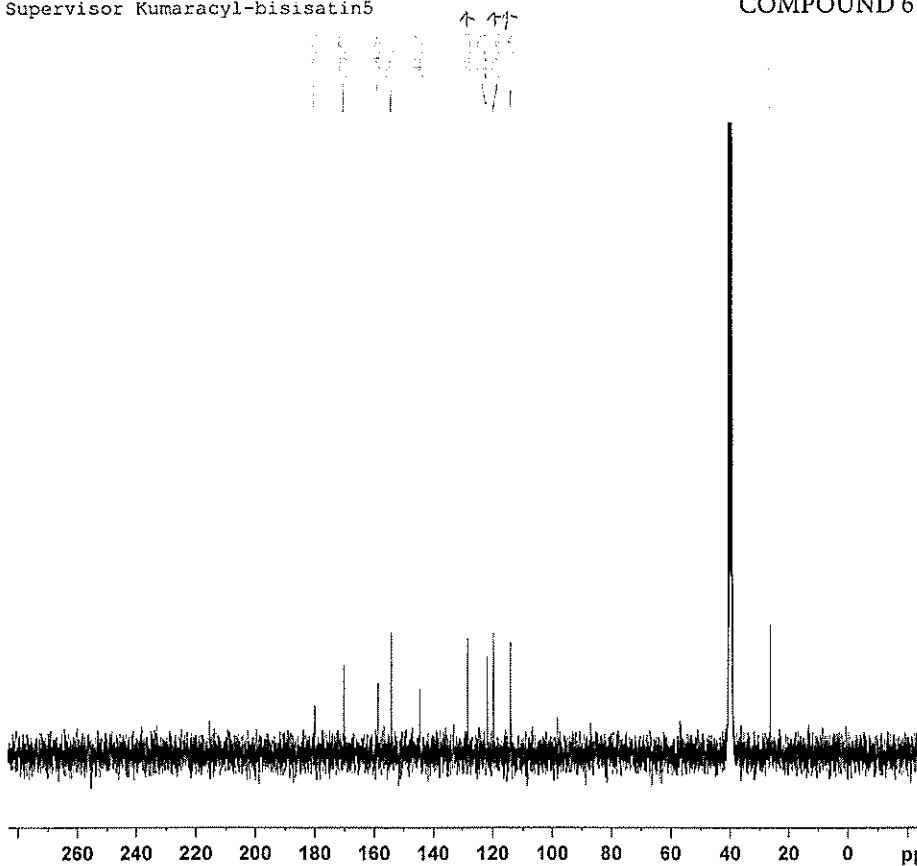

Current Data Parameters  
 NAME 101208-zrn  
 EXPNO 31  
 PROCNO 1

F2 - Acquisition Parameters

Date\_ 20101209  
 Time 7.29  
 INSTRUM dpx1  
 PROBHD 5 mm QNP 1H/13  
 PULPROG zgpg30  
 TD 65536  
 SOLVENT DMSO  
 NS 1024  
 DS 2  
 SRH 23809.523 Hz  
 FIDRES 0.363304 Hz  
 AQ 1.3763061 sec  
 RG 16384  
 DW 21.000 usec  
 DE 25.00 usec  
 TE 293.6 K  
 D1 2.0000000 sec  
 d11 0.0300000 sec  
 DELTA 1.89999998 sec  
 TD0 1

===== CHANNEL f1 =====  
 NUC1 13C  
 P1 7.50 usec  
 PL1 -3.00 dB  
 SFO1 75.4873094 MHz

===== CHANNEL f2 =====  
 CPDPRG2 waltz16  
 NUC2 1H  
 PCPD2 105.00 usec  
 PL2 -3.00 dB  
 PL12 17.34 dB  
 PL13 23.60 dB  
 SFO2 300.1715008 MHz

F2 - Processing parameters  
 SI 32768  
 SF 75.4778155 MHz  
 WDW EM  
 SSB 0  
 LB 1.00 Hz  
 GB 0  
 PC 1.40

88

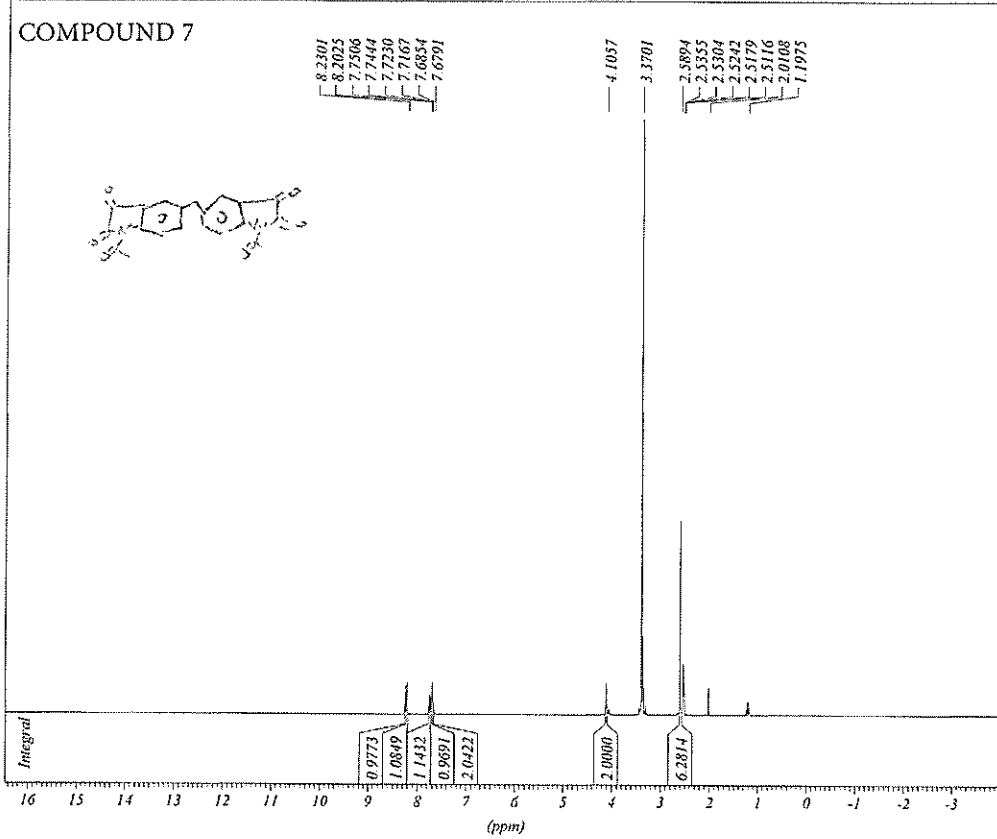

\*\*\* Current Data Parameters \*\*\*

NAME : 090612-1  
 EXPNO : 20  
 PROCNO : 1

\*\*\* Acquisition Parameters \*\*\*

DATE\_1 : 01.26.58  
 DATE\_d : Jun 12 2009  
 DS : 2  
 LOCNUC : 2H  
 NS : 16  
 O1 : 1853.67 Hz  
 O2 : 1853.67 Hz  
 RG : 406.3999939  
 SFO1 : 300.1718537 MHz  
 SOLVENT : DMSO  
 SW : 20.5644 ppm  
 TD : 32768  
 TE : 298.2 K

\*\*\* Processing Parameters \*\*\*

LB : 0.30 Hz  
 PC : 1.00  
 SF : 300.1700000 MHz  
 SI : 16384

\*\*\* 1D NMR Plot Parameters \*\*\*

SR : -0.00 Hz  
 SOLVENT : ?

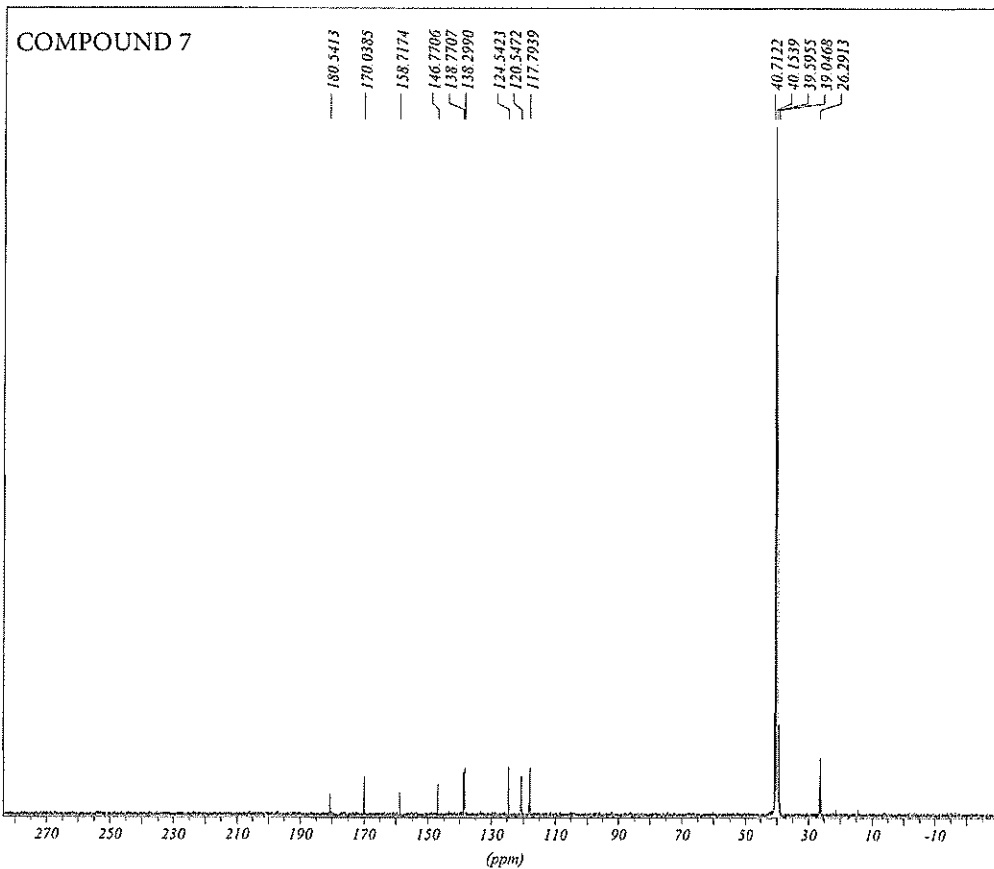

\*\*\* Current Data Parameters \*\*\*

NAME : 090612-1  
 EXPNO : 21  
 PROCNO : 1

\*\*\* Acquisition Parameters \*\*\*

DATE\_1 : 03.25.11  
 DATE\_d : Jun 12 2009  
 DS : 2  
 LOCNUC : 2H  
 NS : 2048  
 O1 : 9532.38 Hz  
 O2 : 1500.85 Hz  
 RG : 16384.0000000  
 SFO1 : 75.4873094 MHz  
 SOLVENT : DMSO  
 SW : 315.4189 ppm  
 TD : 65536  
 TE : 298.2 K

\*\*\* Processing Parameters \*\*\*

LB : 1.00 Hz  
 PC : 1.40  
 SF : 75.4778147 MHz  
 SI : 32768

\*\*\* 1D NMR Plot Parameters \*\*\*

SR : 37.74 Hz  
 SOLVENT : ?

Supervisor Kumar  
acyl-bisatin5  
1H DMSO F:\srn 12

COMPOUND 8

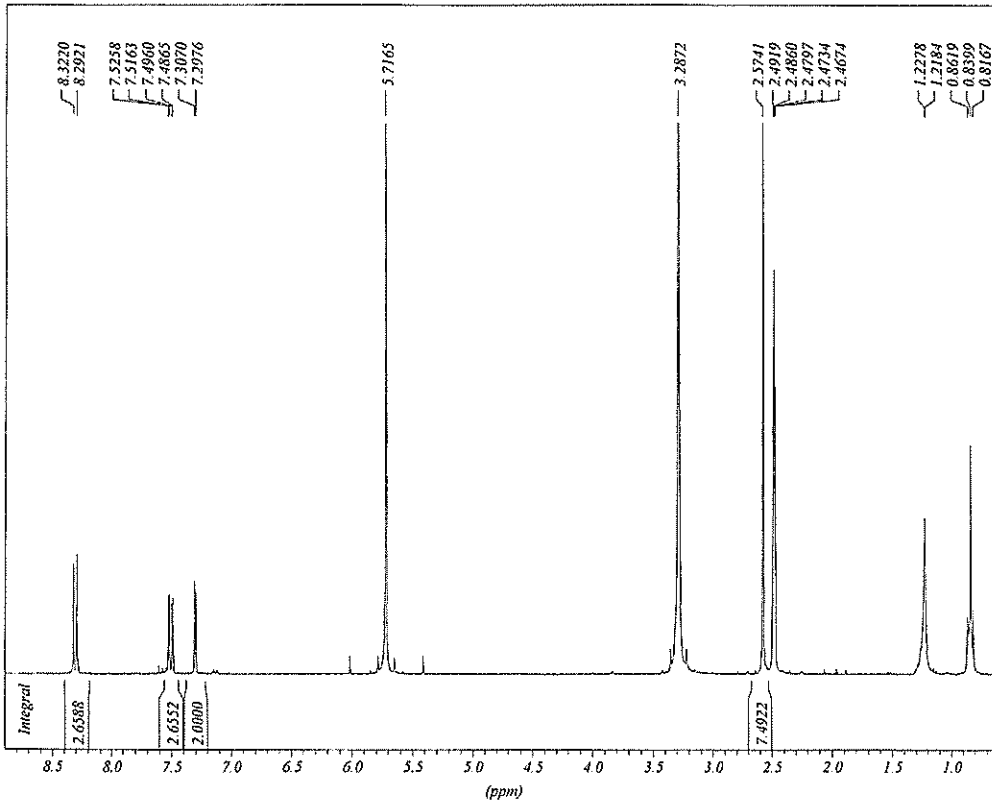

\*\*\* Current Data Parameters \*\*\*  
NAME : 0AQVQ7-L  
EXPNO : 4  
PROCNO : 1

\*\*\* Acquisition Parameters \*\*\*  
DATE\_t : 13.30.26  
DATE\_d : Sep 05 2009  
DS : 4  
LOCNUC : 2H  
NS : 16  
O1 : 1853.67 Hz  
O2 : 0.00 Hz  
RG : 362.0000000  
SFO1 : 300.1318537 MHz  
SOLVENT : DMSO  
SH : 20.5671 ppm  
TD : 32768  
TE : 298.0 K

\*\*\* Processing Parameters \*\*\*  
LB : 0.30 Hz  
PC : 1.00  
SF : 300.1300071 MHz  
SI : 65536

\*\*\* 1D NMR Plot Parameters \*\*\*  
SR : 7.14 Hz  
SOLVENT : ?

8

Supervisor Kumaracyl-bisatin5

COMPOUND 8

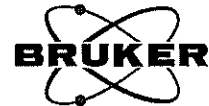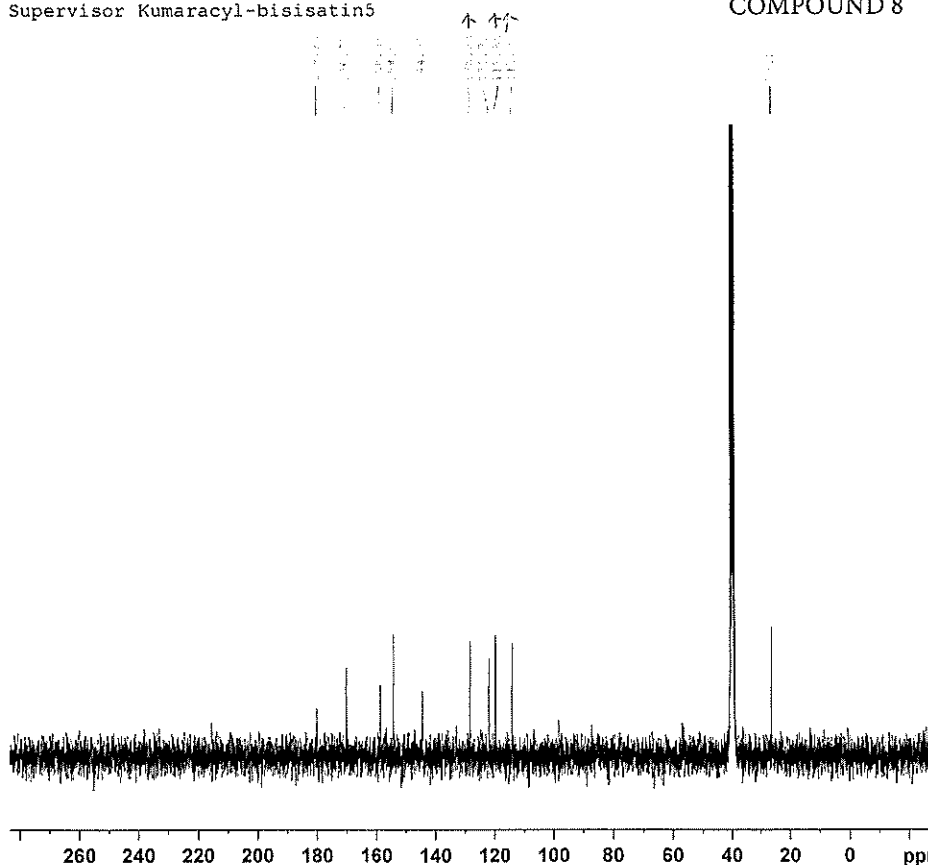

Current Data Parameters  
NAME : 101208-zrn  
EXPNO : 31  
PROCNO : 1

F2 - Acquisition Parameters  
Date : 20101209  
Time : 7.29  
INSTRUM : dpx1  
PROBHD : 5 mm QNP 1H/13  
PULPROG : zgpg30  
TD : 65536  
SOLVENT : DMSO  
NS : 1024  
DS : 2  
SWH : 23809.525 Hz  
FIDRES : 0.363304 Hz  
AQ : 1.3763061 sec  
RG : 16384  
DW : 21.000 usec  
DE : 25.00 usec  
TE : 293.6 K  
D1 : 2.00000000 sec  
d11 : 0.03000000 sec  
DELTA : 1.09999999 sec  
TDO : 1

===== CHANNEL f1 =====  
NUC1 : 13C  
P1 : 7.50 usec  
PL1 : -3.00 dB  
SFO1 : 75.4873094 MHz

===== CHANNEL f2 =====  
CPDPRG2 : waltz16  
NUC2 : 1H  
PCPD2 : 105.00 usec  
PL2 : -3.00 dB  
PL12 : 17.34 dB  
PL13 : 23.60 dB  
SFO2 : 300.1715008 MHz

F2 - Processing parameters  
SI : 32768  
SF : 75.4770155 MHz  
WDW : EM  
SSB : 0  
LB : 1.00 Hz  
GB : 0  
FC : 1.40

8

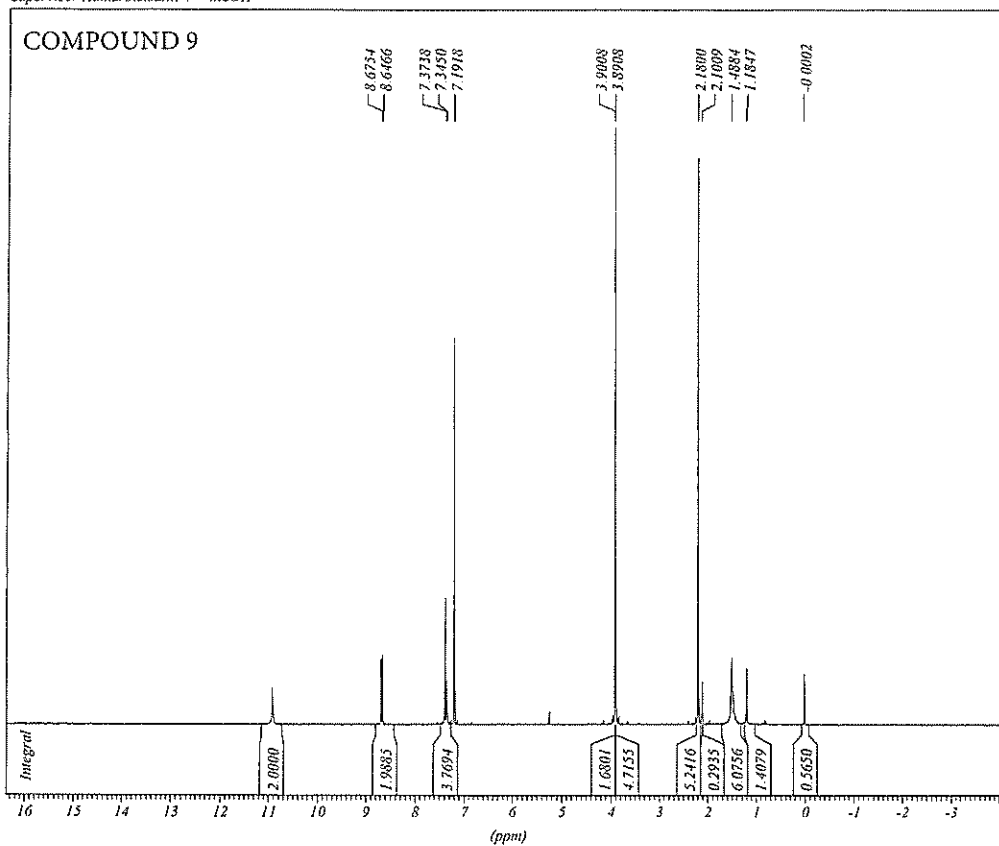

\*\*\* Current Data Parameters \*\*\*

NAME 02UNV8-11  
EXPNO 20  
PROCNO 1

\*\*\* Acquisition Parameters \*\*\*

DATE\_1 07.13.25  
DATE\_d Jul 21 2009  
DS 2  
LOCNUC 2H  
NS 16  
O1 1853.67 Hz  
O2 1853.67 Hz  
RG 1149.4000244  
SFO1 300.1718537 MHz  
SOLVENT CDCl3  
SW 20.5644 ppm  
TD 32768  
TE 300.2 K

\*\*\* Processing Parameters \*\*\*

LB 0.30 Hz  
PC 1.00  
SF 300.1700257 MHz  
SI 16384

\*\*\* 1D NMR Plot Parameters \*\*\*

SR 25.69 Hz  
SOLVENT ?

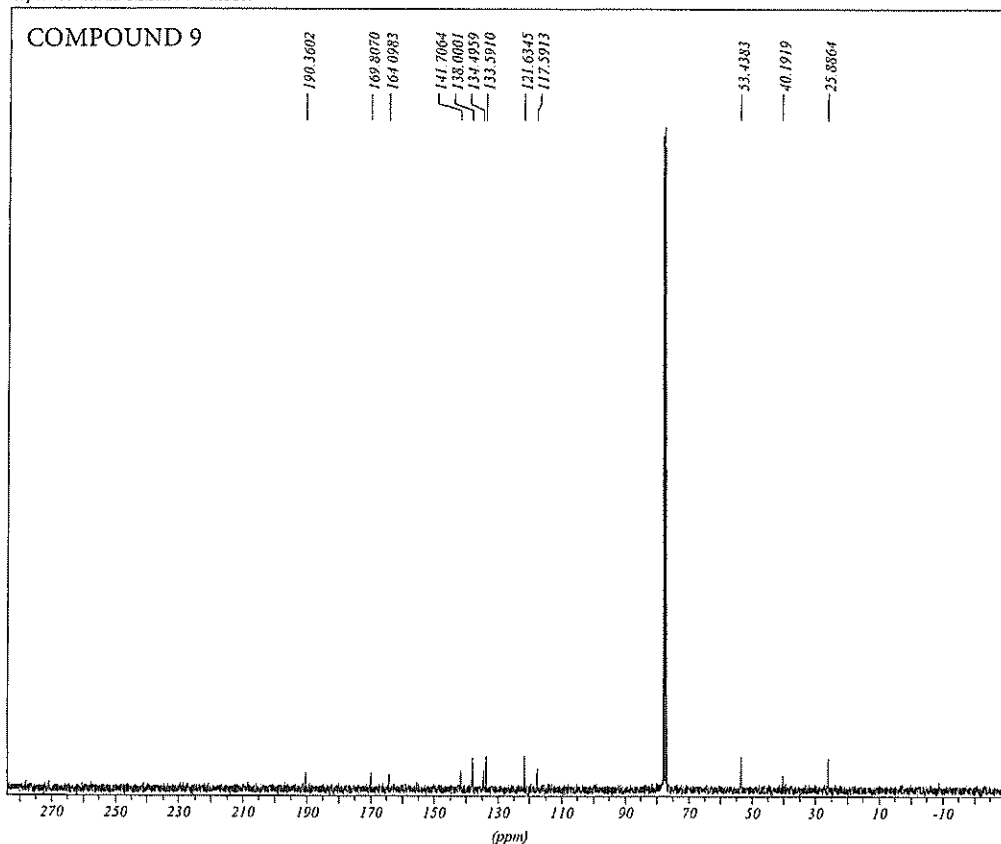

\*\*\* Current Data Parameters \*\*\*

NAME 02UNV8-11  
EXPNO 21  
PROCNO 1

\*\*\* Acquisition Parameters \*\*\*

DATE\_1 09.11.41  
DATE\_d Jul 21 2009  
DS 2  
LOCNUC 2H  
NS 2048  
O1 9532.38 Hz  
O2 1500.85 Hz  
RG 16384.0000000  
SFO1 75.4873094 MHz  
SOLVENT CDCl3  
SW 315.4109 ppm  
TD 65536  
TE 300.2 K

\*\*\* Processing Parameters \*\*\*

LB 1.00 Hz  
PC 1.40  
SF 75.4777770 MHz  
SI 32768

\*\*\* 1D NMR Plot Parameters \*\*\*

SR -0.00 Hz  
SOLVENT ?

Supervisor KumarMeOH+bisisatin5

COMPOUND 11

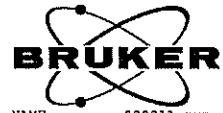

NAME 090911-zrn  
 EXPNO 20  
 PROCNO 1  
 Date\_ 20091109  
 Time 16.08  
 INSTRUM dpx1  
 PROBHD 5 mm QNP 1H/13  
 PULPROG zg  
 TD 32768  
 SOLVENT CDCl3  
 NS 16  
 DS 2  
 SWH 6172.839 Hz  
 FIDRES 0.188380 Hz  
 AQ 2.6542580 sec  
 RG 645.1  
 DN 81.000 usec  
 DE 12.00 usec  
 TE 298.2 K  
 D1 1.5000000 sec  
 TDO 1

----- CHANNEL f1 -----  
 NUC1 1H  
 P1 10.10 usec  
 PL1 -3.00 dB  
 SFO1 300.1718537 MHz  
 SI 65536  
 SF 300.1700318 MHz  
 WDW EM  
 SSB 0  
 LB 0.30 Hz  
 GB 0  
 PC 1.00

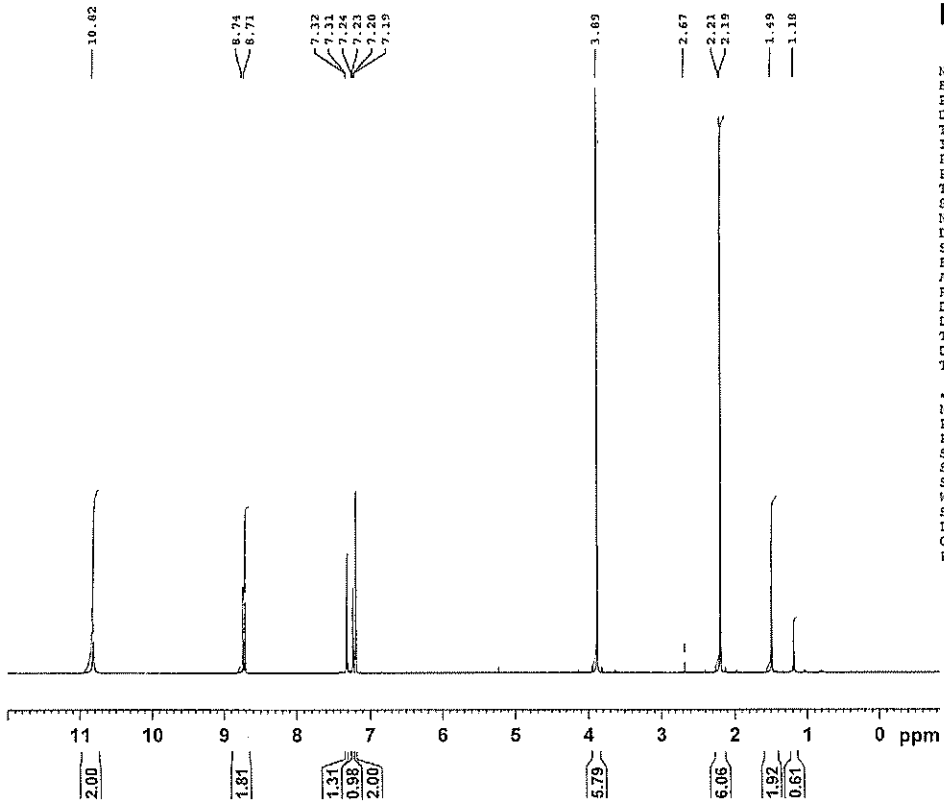

24

Supervisor KumarMeOH+bisisatin5

COMPOUND 11

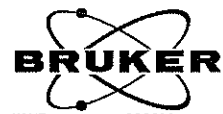

NAME 090911-zrn  
 EXPNO 21  
 PROCNO 1  
 Date\_ 20091109  
 Time 18.06  
 INSTRUM dpx1  
 PROBHD 5 mm QNP 1H/13  
 PULPROG zgpg30  
 TD 65536  
 SOLVENT CDCl3  
 NS 2048  
 DS 2  
 SWH 23809.523 Hz  
 FIDRES 0.363304 Hz  
 AQ 1.3763061 sec  
 RG 16384  
 DH 21.000 usec  
 DE 25.00 usec  
 TE 298.2 K  
 D1 2.0000000 sec  
 d11 0.0300000 sec  
 DELTA 1.89999998 sec  
 TDO 1

----- CHANNEL f1 -----  
 NUC1 13C  
 P1 7.50 usec  
 PL1 -3.00 dB  
 SFO1 75.4873094 MHz

----- CHANNEL f2 -----  
 CPDPRG2 waltz16  
 NUC2 1H  
 PCPD2 105.00 usec  
 PL2 -3.00 dB  
 PL12 17.34 dB  
 PL13 23.60 dB  
 SFO2 300.1715008 MHz  
 SI 32768  
 SF 75.4777770 MHz  
 WDW EM  
 SSB 0  
 LB 1.00 Hz  
 GB 0  
 PC 1.40

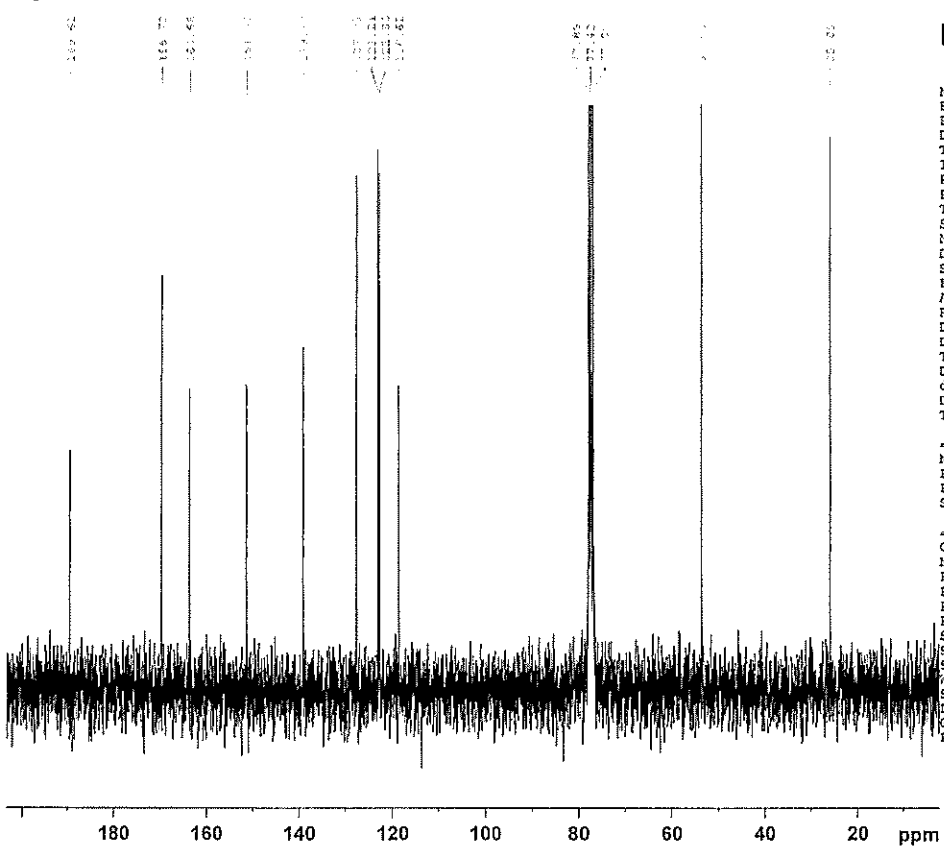



Supervisor Kumar  
EtOH+bisatin 5  
1H CDC13 F: Wzn 20

### COMPOUND 12

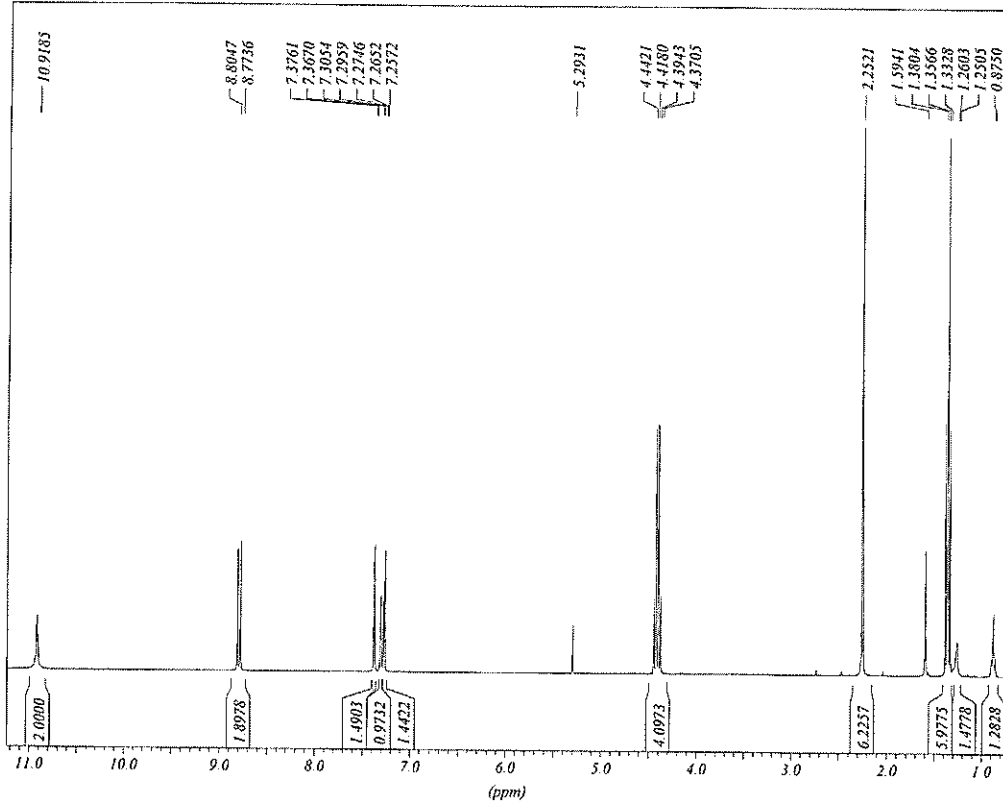

\*\*\* Current Data Parameters \*\*\*

NAME : 0YF2PZ-5  
EXPNO : 5  
PROCNO : 1

\*\*\* Acquisition Parameters \*\*\*

DATE\_1 : 00:06:26  
DATE\_d : Nov 06 2009  
DS : 0  
LOCNUC : 2H  
NS : 16  
O1 : 2100.91 Hz  
O2 : 0.00 Hz  
RG : 287.3999939  
SFO1 : 300.1321009 MHz  
SOLVENT : CDCl3  
SW : 19.9752 ppm  
TD : 32768  
TE : 298.0 K

\*\*\* Processing Parameters \*\*\*

LB : 0.30 Hz  
PC : 1.00  
SF : 300.1300071 MHz  
SI : 65536

\*\*\* 1D NMR Plot Parameters \*\*\*

SR : 7.14 Hz  
SOLVENT : ?

24  
25

Supervisor Kumar  
EtOH+bisatin 5  
13C{1H} CDC13 F: Wzn 20

### COMPOUND 12

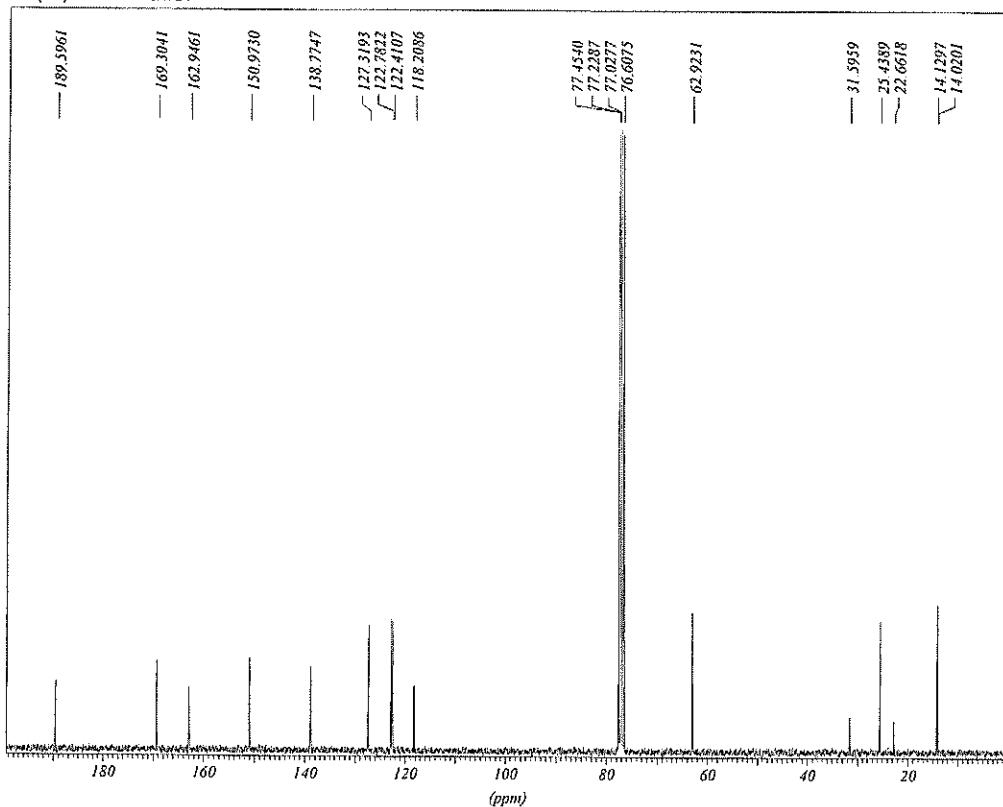

\*\*\* Current Data Parameters \*\*\*

NAME : 0YF2PZ-5  
EXPNO : 6  
PROCNO : 1

\*\*\* Acquisition Parameters \*\*\*

DATE\_1 : 01:55:33  
DATE\_d : Nov 06 2009  
DS : 0  
LOCNUC : 2H  
NS : 2048  
O1 : 7546.77 Hz  
O2 : 1500.85 Hz  
RG : 18390.4003906  
SFO1 : 75.4752658 MHz  
SOLVENT : CDCl3  
SW : 199.5388 ppm  
TD : 32768  
TE : 297.9 K

\*\*\* Processing Parameters \*\*\*

LB : 1.00 Hz  
PC : 1.40  
SF : 75.4677485 MHz  
SI : 32768

\*\*\* 1D NMR Plot Parameters \*\*\*

SR : 29.46 Hz  
SOLVENT : ?

Supervisor Kumar  
NH3+bisisatin4  
1H DMSO F:\zrn 9

COMPOUND 13

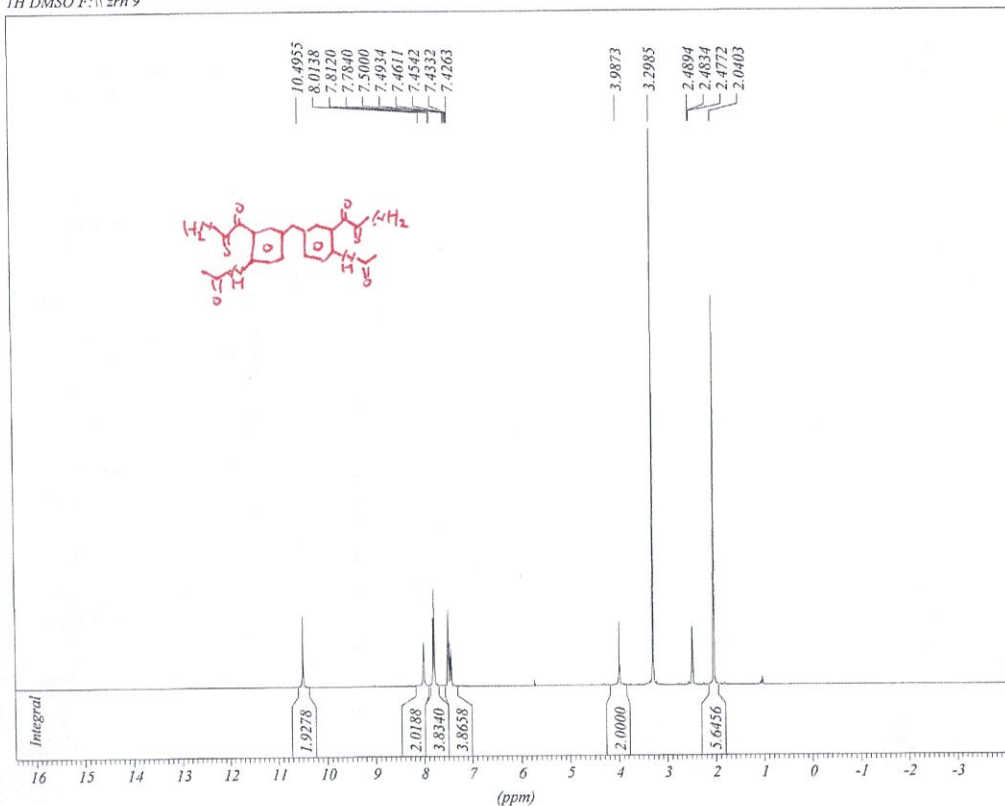

\*\*\* Current Data Parameters \*\*\*

NAME : 0G8AGH-1  
EXPNO : 4  
PROCNO : 1

\*\*\* Acquisition Parameters \*\*\*

DATE\_1 : 12:44:46  
DATE\_d : Aug 31 2009  
DS : 4  
LOCNUC : 2H  
NS : 16  
O1 : 1853.67 Hz  
O2 : 0.00 Hz  
RG : 362.0000000  
SFO1 : 300.1318537 MHz  
SOLVENT : DMSO  
SW : 20.5671 ppm  
TD : 32768  
TE : 298.0 K

\*\*\* Processing Parameters \*\*\*

LB : 0.30 Hz  
PC : 1.00  
SF : 300.1300071 MHz  
SI : 65536

\*\*\* 1D NMR Plot Parameters \*\*\*

SR : 7.14 Hz  
SOLVENT : ?

14

Supervisor Kumar  
NH3+bisisatin4  
13C{1H} DMSO F:\zrn 9

COMPOUND 13

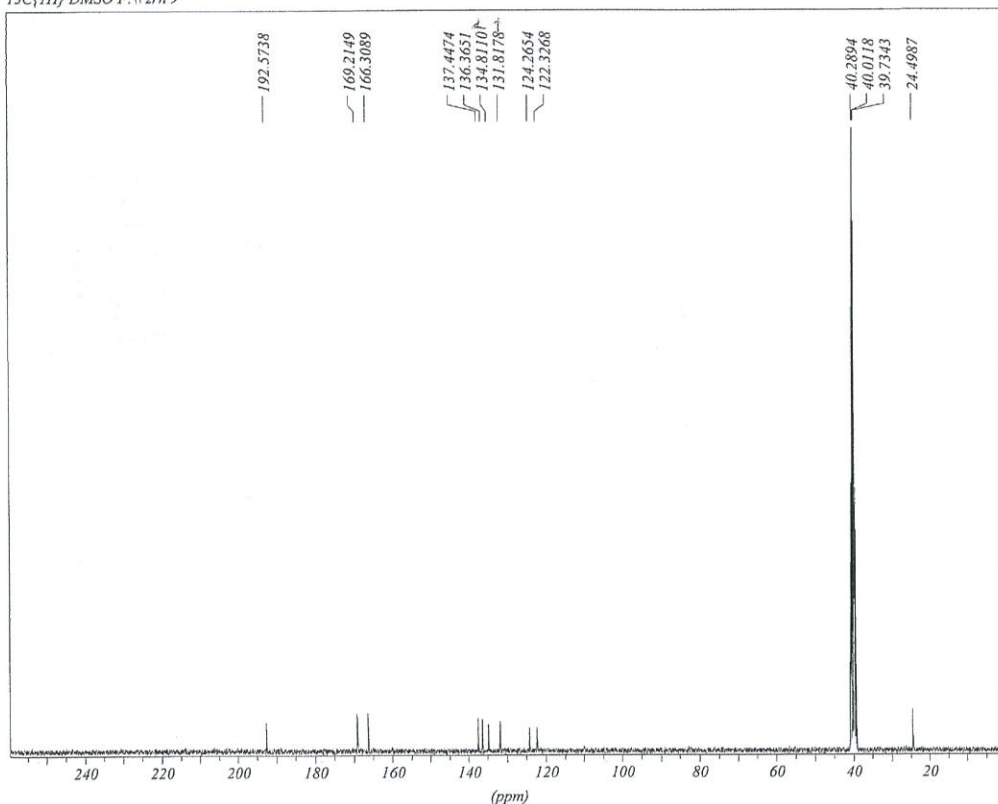

\*\*\* Current Data Parameters \*\*\*

NAME : 0G8AGH-1  
EXPNO : 5  
PROCNO : 1

\*\*\* Acquisition Parameters \*\*\*

DATE\_1 : 13:50:17  
DATE\_d : Aug 31 2009  
DS : 0  
LOCNUC : 2H  
NS : 1024  
O1 : 9810.80 Hz  
O2 : 1500.85 Hz  
RG : 16384.0000000  
SFO1 : 75.4775298 MHz  
SOLVENT : DMSO  
SW : 259.7838 ppm  
TD : 65536  
TE : 298.0 K

\*\*\* Processing Parameters \*\*\*

LB : 1.00 Hz  
PC : 1.40  
SF : 75.4677485 MHz  
SI : 65536

\*\*\* 1D NMR Plot Parameters \*\*\*

SR : 29.46 Hz  
SOLVENT : ?

Supervisor Kumar  
NH3-bisatin 5  
1H DMSO F:\zrn 19

COMPOUND 14

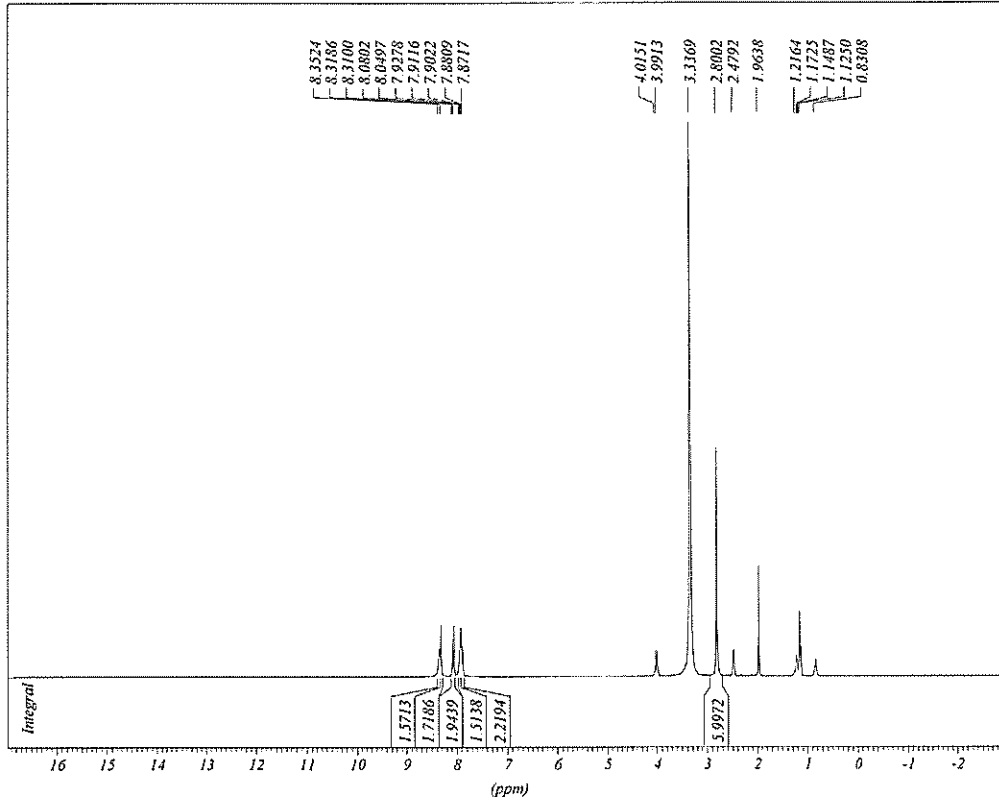

\*\*\* Current Data Parameters \*\*\*

NAME : 0YF2PZ-5  
EXPNO : 2  
PROCNO : 1

\*\*\* Acquisition Parameters \*\*\*

DATE\_t : 21:10:37  
DATE\_d : Nov 05 2009  
DS : 0  
LOCNUC : 2H  
NS : 16  
O1 : 2100.91 Hz  
O2 : 0.00 Hz  
RG : 143.6999969  
SFO1 : 300.1321009 MHz  
SOLVENT : DMSO  
SW : 19.9752 ppm  
TD : 32768  
TE : 298.3 K

\*\*\* Processing Parameters \*\*\*

LB : 0.30 Hz  
PC : 1.00  
SF : 300.1300071 MHz  
SI : 65536

\*\*\* 1D NMR Plot Parameters \*\*\*

SR : 7.14 Hz  
SOLVENT : ?

15

Supervisor Kumar  
NH3-bisatin 5  
13C(1H) DMSO F:\zrn 19

COMPOUND 14

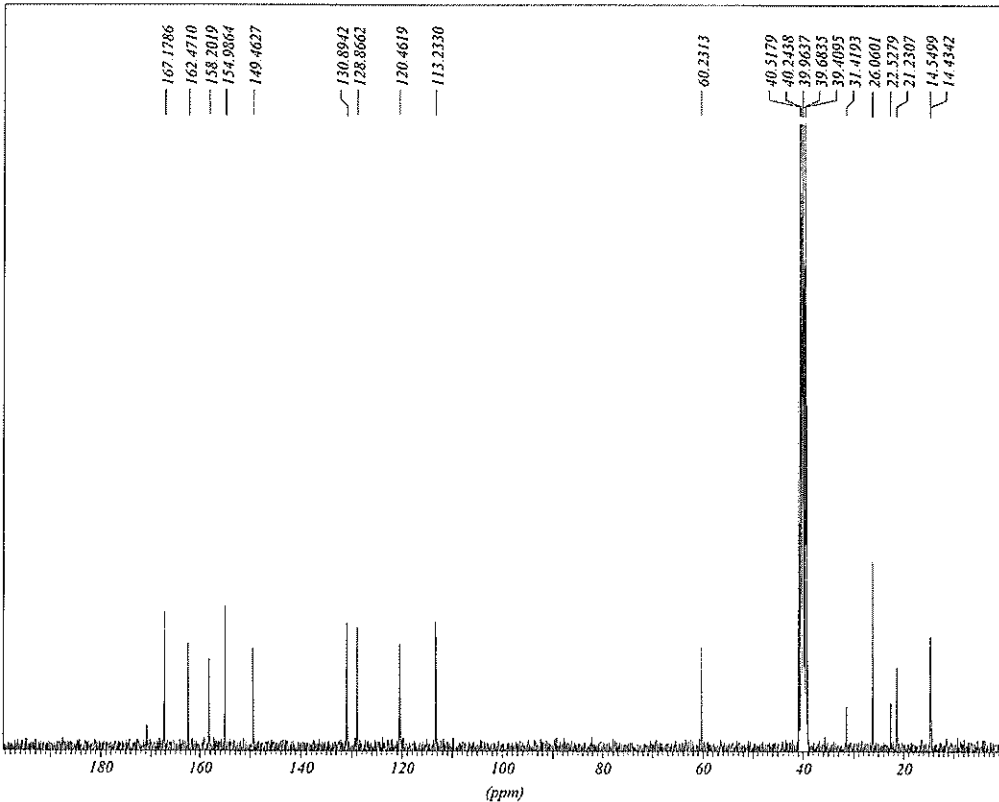

\*\*\* Current Data Parameters \*\*\*

NAME : 0YF2PZ-5  
EXPNO : 3  
PROCNO : 1

\*\*\* Acquisition Parameters \*\*\*

DATE\_t : 23:00:24  
DATE\_d : Nov 05 2009  
DS : 0  
LOCNUC : 2H  
NS : 2048  
O1 : 7546.77 Hz  
O2 : 1500.85 Hz  
RG : 16384.0000000  
SFO1 : 75.4752638 MHz  
SOLVENT : DMSO  
SW : 199.5388 ppm  
TD : 32768  
TE : 297.6 K

\*\*\* Processing Parameters \*\*\*

LB : 1.00 Hz  
PC : 1.40  
SF : 75.4677485 MHz  
SI : 32768

\*\*\* 1D NMR Plot Parameters \*\*\*

SR : 29.46 Hz  
SOLVENT : ?

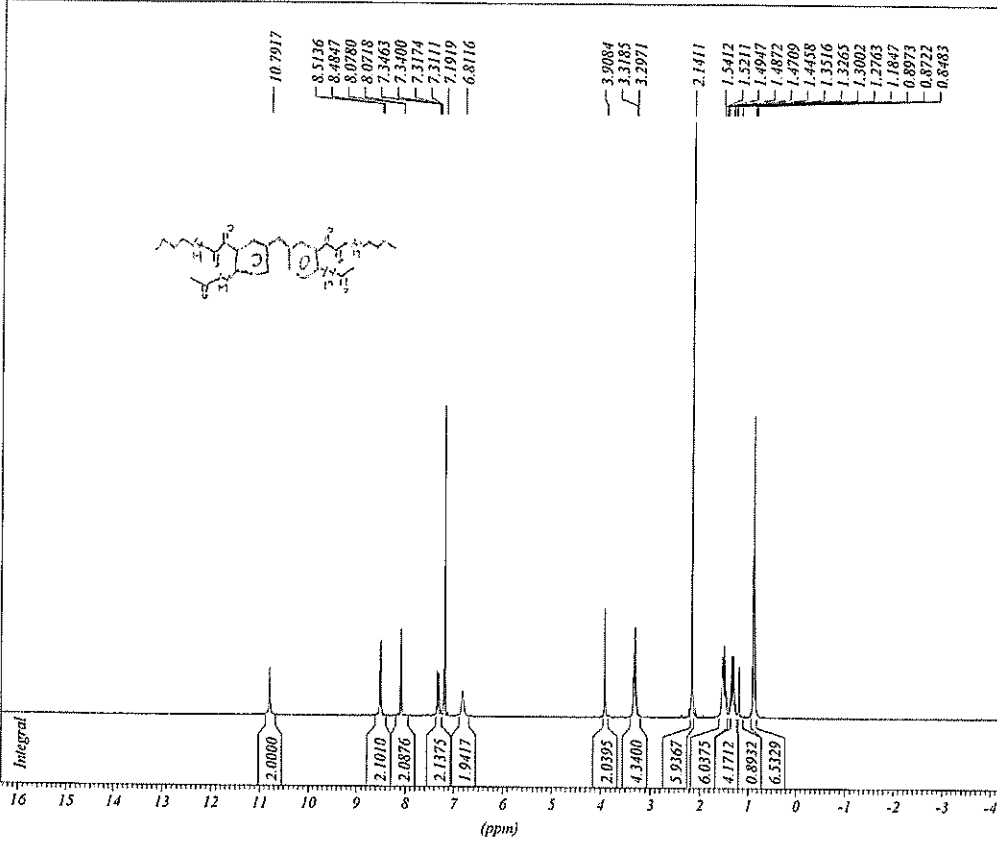

\*\*\* Current Data Parameters \*\*\*

NAME : 097KLS-8  
 EXPNO : 20  
 PROCNO : 1

\*\*\* Acquisition Parameters \*\*\*

DATE\_t : 10:41:04  
 DATE\_d : Aug 27 2009  
 DS : 2  
 LOCNUC : 2H  
 NS : 16  
 O1 : 1853.67 Hz  
 O2 : 1853.67 Hz  
 RG : 574.7000122  
 SFO1 : 300.1718537 MHz  
 SOLVENT : CDCl3  
 SW : 20.5644 ppm  
 TD : 32768  
 TE : 300.2 K

\*\*\* Processing Parameters \*\*\*

LB : 0.30 Hz  
 PC : 1.00  
 SF : 300.1700321 MHz  
 SI : 16384

\*\*\* 1D NMR Plot Parameters \*\*\*

SR : 32.08 Hz  
 SOLVENT : ?

16

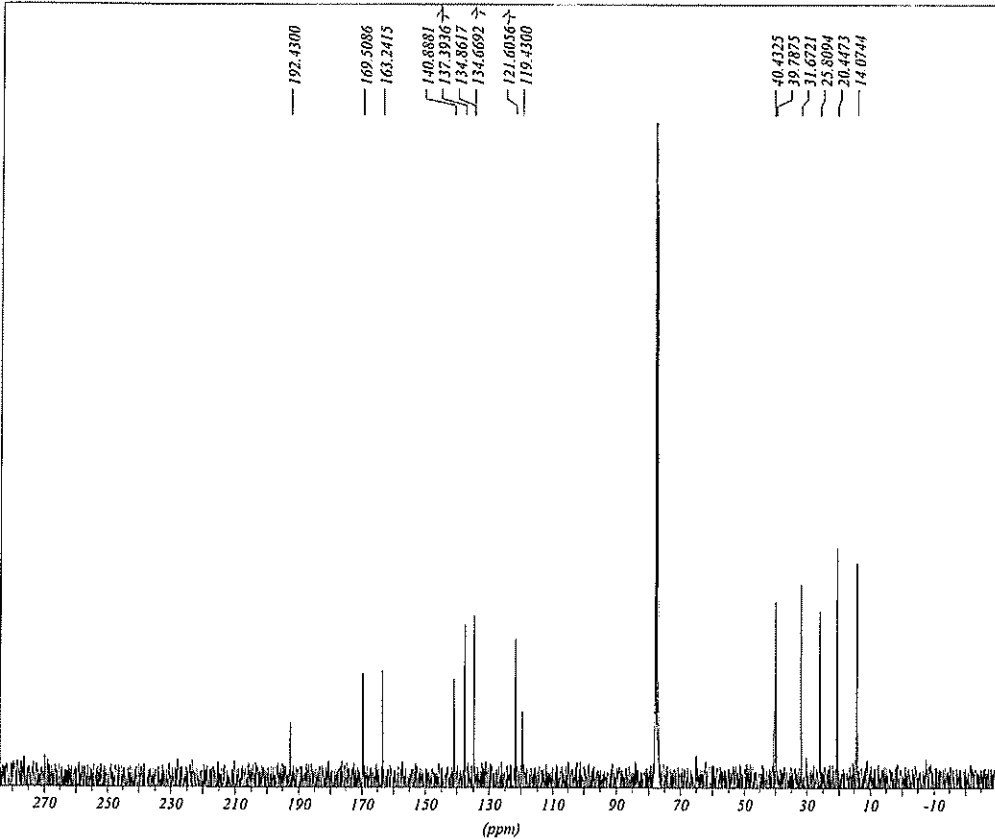

\*\*\* Current Data Parameters \*\*\*

NAME : 097KLS-8  
 EXPNO : 21  
 PROCNO : 1

\*\*\* Acquisition Parameters \*\*\*

DATE\_t : 12:39:22  
 DATE\_d : Aug 27 2009  
 DS : 2  
 LOCNUC : 2H  
 NS : 2048  
 O1 : 9532.38 Hz  
 O2 : 1500.85 Hz  
 RG : 16384.0000000  
 SFO1 : 75.4873094 MHz  
 SOLVENT : CDCl3  
 SW : 315.4109 ppm  
 TD : 65536  
 TE : 300.2 K

\*\*\* Processing Parameters \*\*\*

LB : 1.00 Hz  
 PC : 1.40  
 SF : 75.4777770 MHz  
 SI : 32768

\*\*\* 1D NMR Plot Parameters \*\*\*

SR : -0.00 Hz  
 SOLVENT : ?

Supervisor Kumar  
butylamine + bisisatin5  
1H CDC13 F: Wzm 5

COMPOUND 16

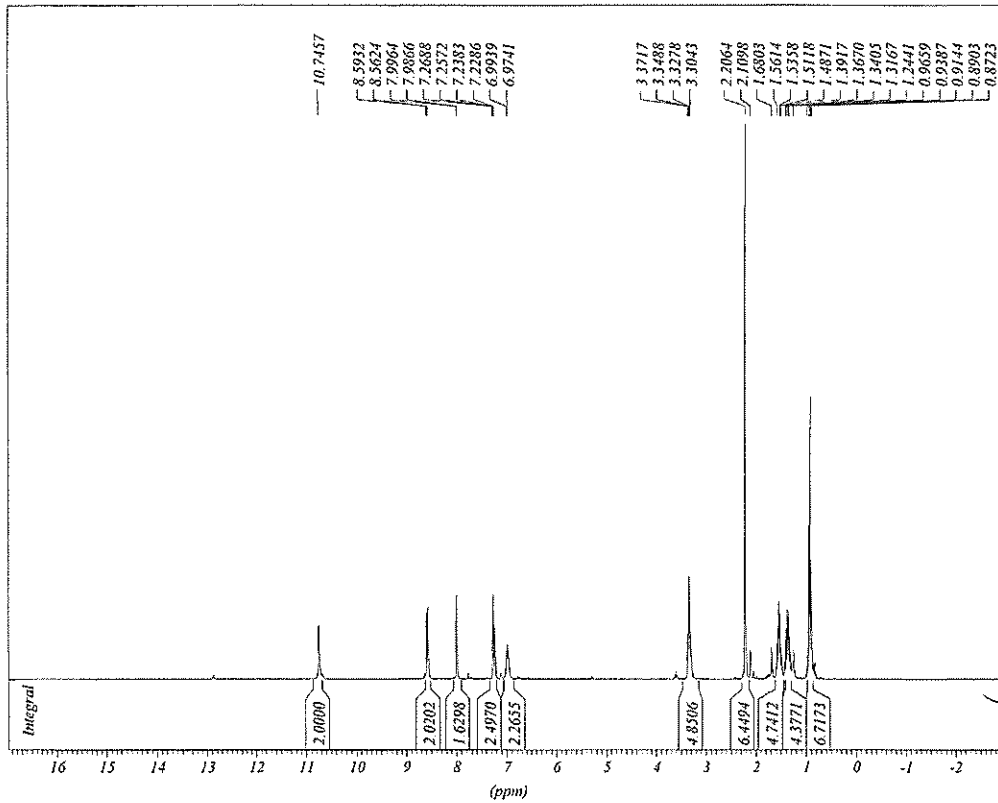

\*\*\* Current Data Parameters \*\*\*  
NAME : OXTMCT-3  
EXPNO : 1  
PROCNO : 1

\*\*\* Acquisition Parameters \*\*\*  
DATE\_t : 01.01.03  
DATE\_d : Oct 27 2009  
DS : 0  
LOCNUC : 2H  
NS : 16  
O1 : 2100.91 Hz  
O2 : 0.00 Hz  
RG : 143.6999969  
SFO1 : 300.1321009 MHz  
SOLVENT : CDCl3  
SW : 19.9752 ppm  
TD : 32768  
TE : 297.9 K

\*\*\* Processing Parameters \*\*\*  
LB : 0.30 Hz  
PC : 1.00  
SF : 300.1300071 MHz  
SI : 65536

\*\*\* 1D NMR Plot Parameters \*\*\*  
SR : 7.14 Hz  
SOLVENT : ?

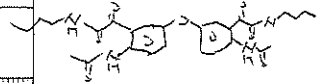

17

Supervisor Kumar  
butylamine + bisisatin5  
13C{1H} CDC13 F: Wzm 5

COMPOUND 16

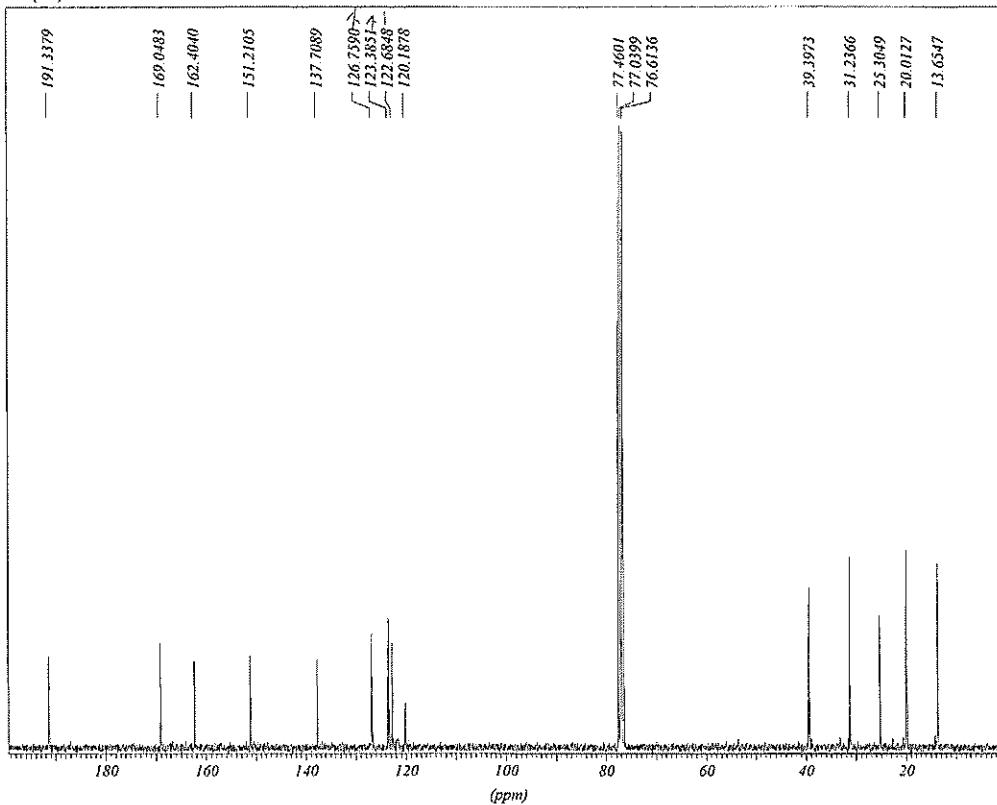

\*\*\* Current Data Parameters \*\*\*  
NAME : OXTMCT-3  
EXPNO : 2  
PROCNO : 1

\*\*\* Acquisition Parameters \*\*\*  
DATE\_t : 02.50.13  
DATE\_d : Oct 27 2009  
DS : 0  
LOCNUC : 2H  
NS : 2048  
O1 : 7546.77 Hz  
O2 : 1500.85 Hz  
RG : 16384.0000000  
SFO1 : 75.4752658 MHz  
SOLVENT : CDCl3  
SW : 199.5388 ppm  
TD : 32768  
TE : 297.8 K

\*\*\* Processing Parameters \*\*\*  
LB : 1.00 Hz  
PC : 1.40  
SF : 75.4677485 MHz  
SI : 32768

\*\*\* 1D NMR Plot Parameters \*\*\*  
SR : 29.46 Hz  
SOLVENT : ?

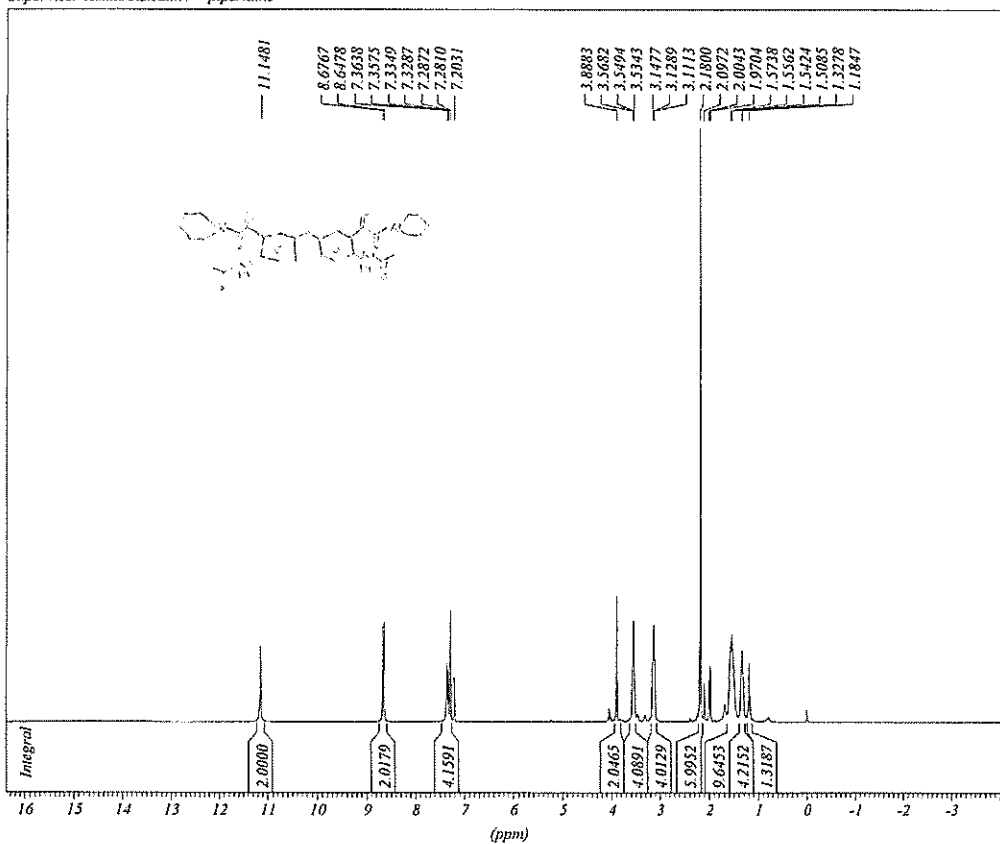

## \*\*\* Current Data Parameters \*\*\*

NAME : 0EE514-Q  
EXPNO : 30  
PROCNO : 1

## \*\*\* Acquisition Parameters \*\*\*

DATE\_t : 22:52:20  
DATE\_d : Jul 18 2009  
DS : 2  
LOCNUC : 2H  
NS : 16  
O1 : 1853.67 Hz  
O2 : 1853.67 Hz  
RG : 203.1999969  
SFO1 : 300.1718537 MHz  
SOLVENT : CDCl3  
SW : 20.5644 ppm  
TD : 32768  
TE : 300.2 K

## \*\*\* Processing Parameters \*\*\*

LB : 0.30 Hz  
PC : 1.00  
SF : 300.1700223 MHz  
SI : 16384

## \*\*\* 1D NMR Plot Parameters \*\*\*

SR : 22.30 Hz  
SOLVENT : ?

12

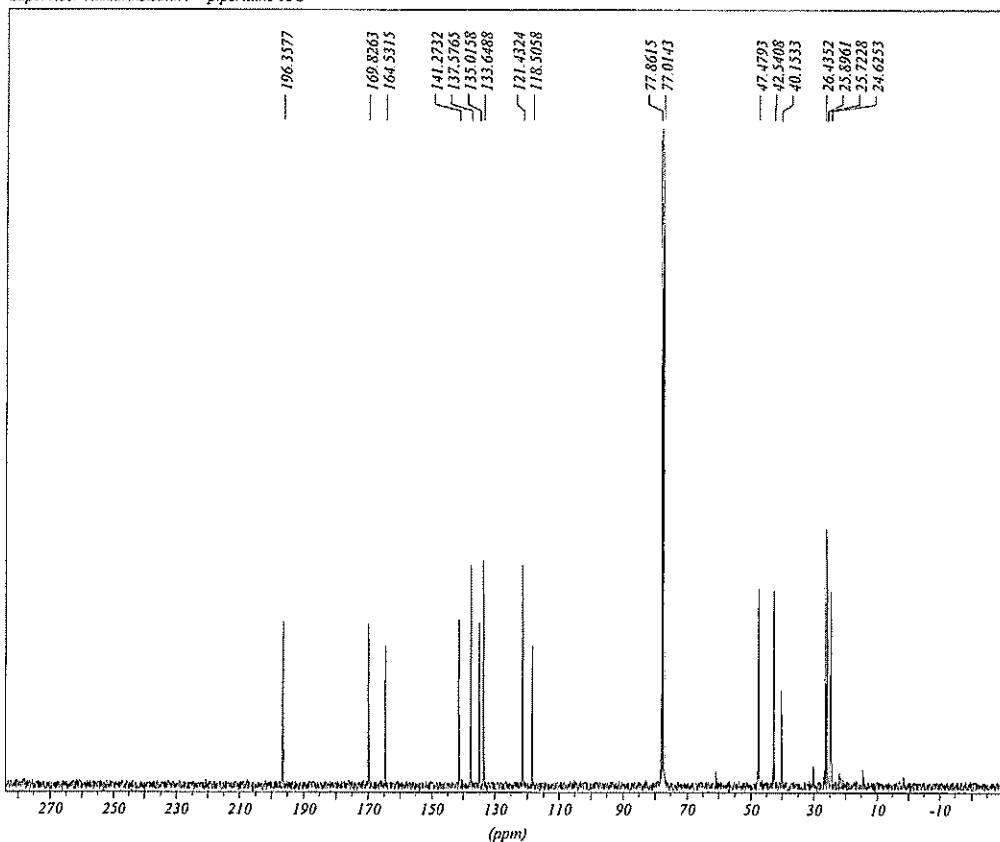

## \*\*\* Current Data Parameters \*\*\*

NAME : 0EE514-Q  
EXPNO : 31  
PROCNO : 1

## \*\*\* Acquisition Parameters \*\*\*

DATE\_t : 00:50:42  
DATE\_d : Jul 19 2009  
DS : 2  
LOCNUC : 2H  
NS : 2048  
O1 : 9532.38 Hz  
O2 : 1500.85 Hz  
RG : 16384.0000000  
SFO1 : 75.4873094 MHz  
SOLVENT : CDCl3  
SW : 315.4109 ppm  
TD : 65536  
TE : 300.2 K

## \*\*\* Processing Parameters \*\*\*

LB : 1.00 Hz  
PC : 1.40  
SF : 75.4777770 MHz  
SI : 32768

## \*\*\* 1D NMR Plot Parameters \*\*\*

SR : -0.00 Hz  
SOLVENT : ?

COMPOUND 18

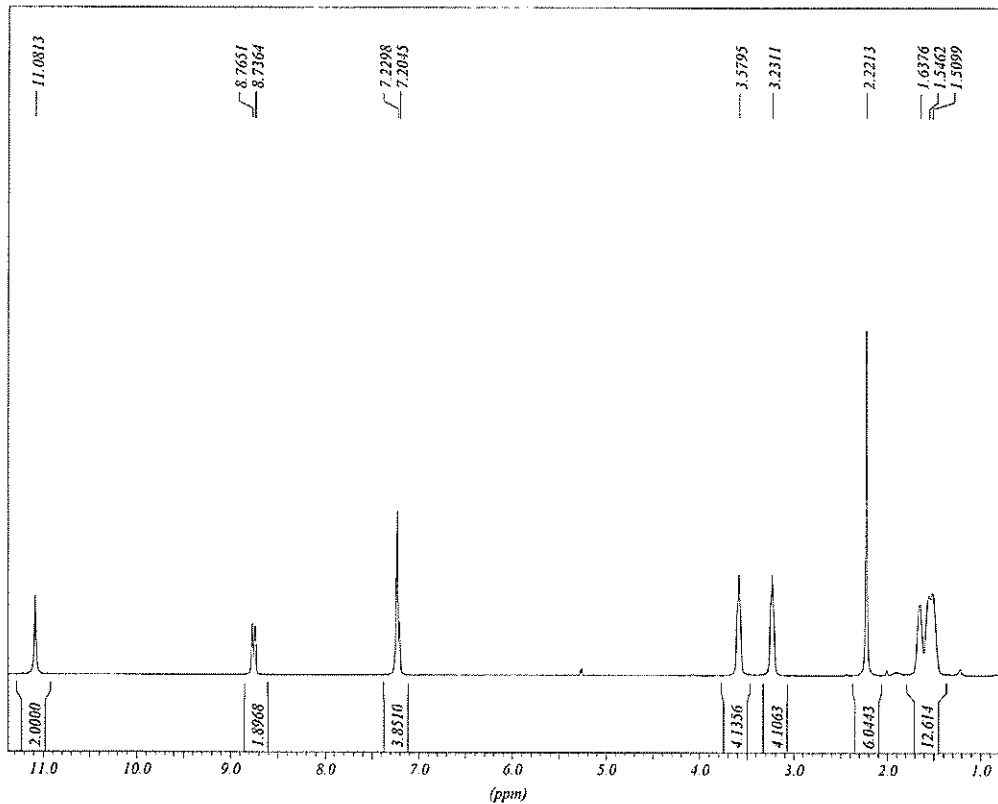

\*\*\* Current Data Parameters \*\*\*

NAME : 023MOS-T  
 EXPNO : 4  
 PROCNO : 1

\*\*\* Acquisition Parameters \*\*\*

DATE\_t : 00.44.36  
 DATE\_d : Oct 29 2009  
 DS : 0  
 LOCNUC : 2H  
 NS : 16  
 O1 : 2100.91 Hz  
 O2 : 0.00 Hz  
 RG : 57.000000  
 SFO1 : 300.1321009 MHz  
 SOLVENT : CDCl3  
 SW : 19.9752 ppm  
 TD : 32768  
 TE : 297.9 K

\*\*\* Processing Parameters \*\*\*

LB : 0.30 Hz  
 PC : 1.00  
 SF : 300.1300071 MHz  
 SI : 65536

\*\*\* 1D NMR Plot Parameters \*\*\*

SR : 7.14 Hz  
 SOLVENT : ?

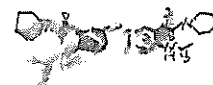

19

COMPOUND 18

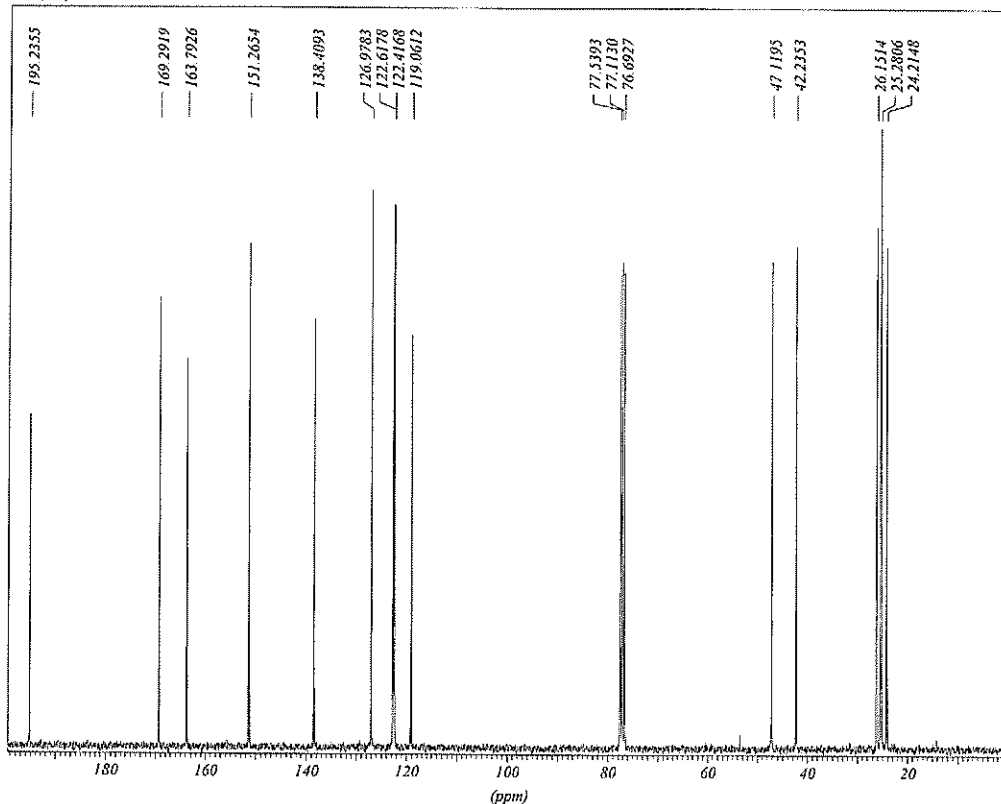

\*\*\* Current Data Parameters \*\*\*

NAME : 023MOS-T  
 EXPNO : 5  
 PROCNO : 1

\*\*\* Acquisition Parameters \*\*\*

DATE\_t : 02:33:52  
 DATE\_d : Oct 29 2009  
 DS : 0  
 LOCNUC : 2H  
 NS : 2048  
 O1 : 7546.77 Hz  
 O2 : 1500.85 Hz  
 RG : 18390.4003906  
 SFO1 : 75.4752658 MHz  
 SOLVENT : CDCl3  
 SW : 199.5388 ppm  
 TD : 32768  
 TE : 297.6 K

\*\*\* Processing Parameters \*\*\*

LB : 1.00 Hz  
 PC : 1.40  
 SF : 75.4677485 MHz  
 SI : 32768

\*\*\* 1D NMR Plot Parameters \*\*\*

SR : 29.46 Hz  
 SOLVENT : ?

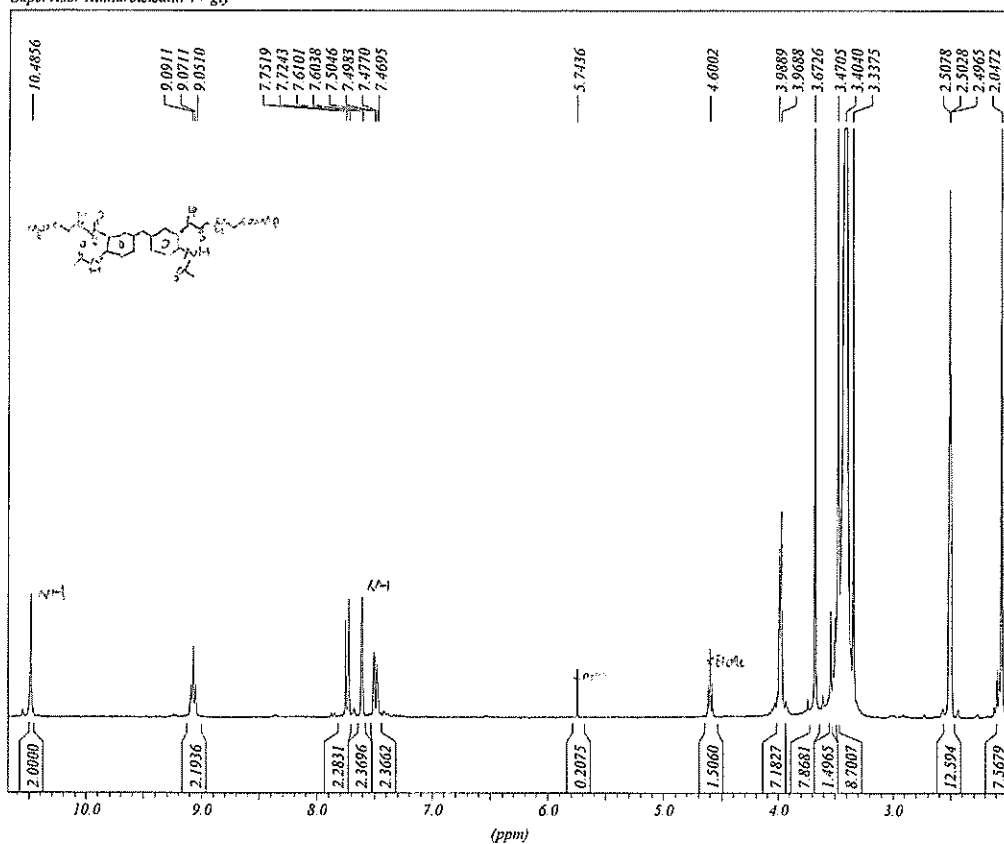

\*\*\* Current Data Parameters \*\*\*

NAME : Ofrew9-i  
EXPNO : 40  
PROCNO : 1

\*\*\* Acquisition Parameters \*\*\*

DATE\_1 : 22:11:59  
DATE\_d : Jul 12 2009  
DS : 2  
LOCNUC : 2H  
NS : 16  
O1 : 1853.67 Hz  
O2 : 1853.67 Hz  
RG : 203.1999969  
SFO1 : 300.1718537 MHz  
SOLVENT : DMSO  
SW : 20.5644 ppm  
TD : 32768  
TE : 299.2 K

\*\*\* Processing Parameters \*\*\*

LB : 0.30 Hz  
PC : 1.00  
SF : 300.1700000 MHz  
SI : 16384

\*\*\* 1D NMR Plot Parameters \*\*\*

SR : -0.00 Hz  
SOLVENT : ?

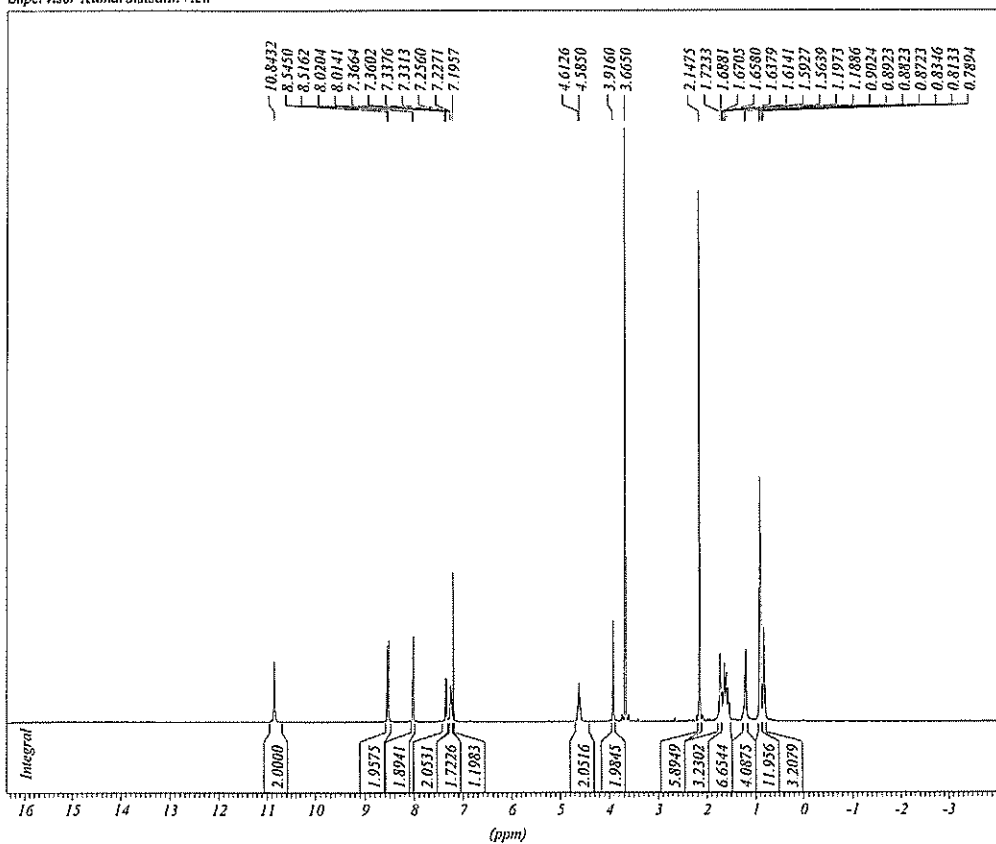

\*\*\* Current Data Parameters \*\*\*

NAME : 00SP2V-X  
EXPNO : 10  
PROCNO : 1

\*\*\* Acquisition Parameters \*\*\*

DATE\_1 : 22:30:25  
DATE\_d : Jul 13 2009  
DS : 2  
LOCNUC : 2H  
NS : 16  
O1 : 1853.67 Hz  
O2 : 1853.67 Hz  
RG : 512.0000000  
SFO1 : 300.1718537 MHz  
SOLVENT : CDCl3  
SW : 20.5644 ppm  
TD : 32768  
TE : 299.2 K

\*\*\* Processing Parameters \*\*\*

LB : 0.30 Hz  
PC : 1.00  
SF : 300.1700245 MHz  
SI : 16384

\*\*\* 1D NMR Plot Parameters \*\*\*

SR : 24.52 Hz  
SOLVENT : ?



Supervisor Kumarleu+bisisatin4

COMPOUND 22

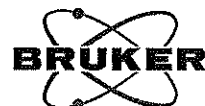

Current Data Parameters  
 NAME 090716-22n  
 EXPNO 21  
 PROCNO 1

F2 - Acquisition Parameters  
 Date\_ 20090717  
 Time 4.15  
 INSTRUM dpr1  
 PROBHD 5 mm QNP 1H/13  
 PULPROG zgpg30  
 TD 65536  
 SOLVENT CDCl3  
 NS 2048  
 DS 2  
 SHH 23809.523 Hz  
 FIDRES 0.363304 Hz  
 AQ 1.3763061 sec  
 RG 16384  
 DN 21.000 usec  
 DE 25.00 usec  
 TE 300.2 K  
 D1 2.0000000 sec  
 d11 0.0300000 sec  
 DELTA 1.8999998 sec  
 TDO 1

===== CHANNEL f1 =====  
 NUC1 13C  
 P1 7.50 usec  
 PL1 -3.00 dB  
 SFO1 75.4873094 MHz

===== CHANNEL f2 =====  
 CPDPRG2 waltz16  
 NUC2 1H  
 PCPD2 105.00 usec  
 PL2 -3.00 dB  
 PL12 17.60 dB  
 PL13 23.60 dB  
 SFO2 300.1715008 MHz

F2 - Processing parameters  
 SI 32768  
 SF 75.4777770 MHz  
 WDW EM  
 SSB 0  
 LB 1.00 Hz  
 GB 0  
 PC 1.40

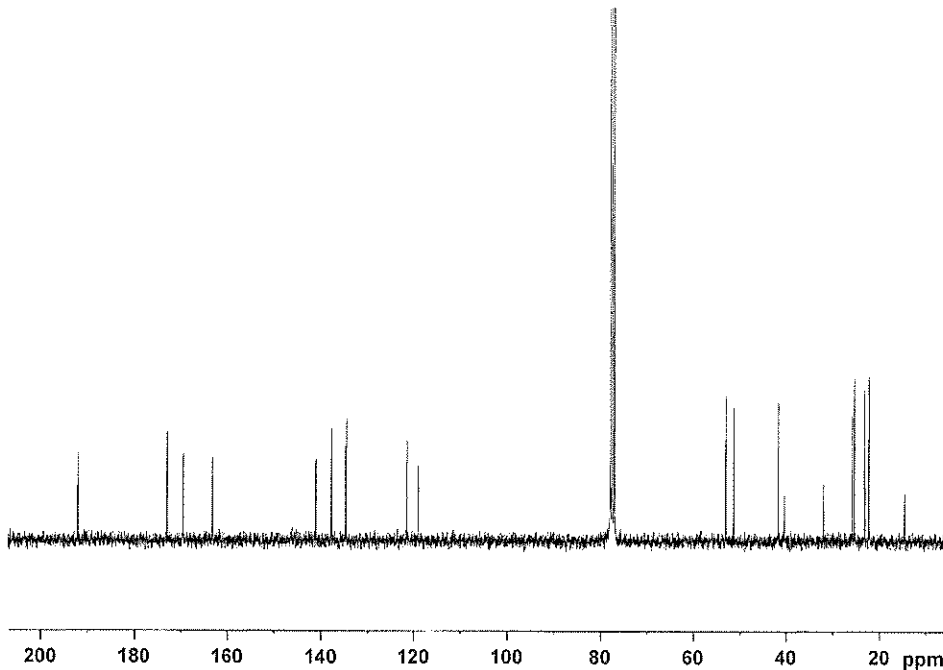

Supervisor Kumarbisatisin+met

COMPOUND 23

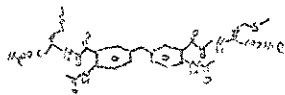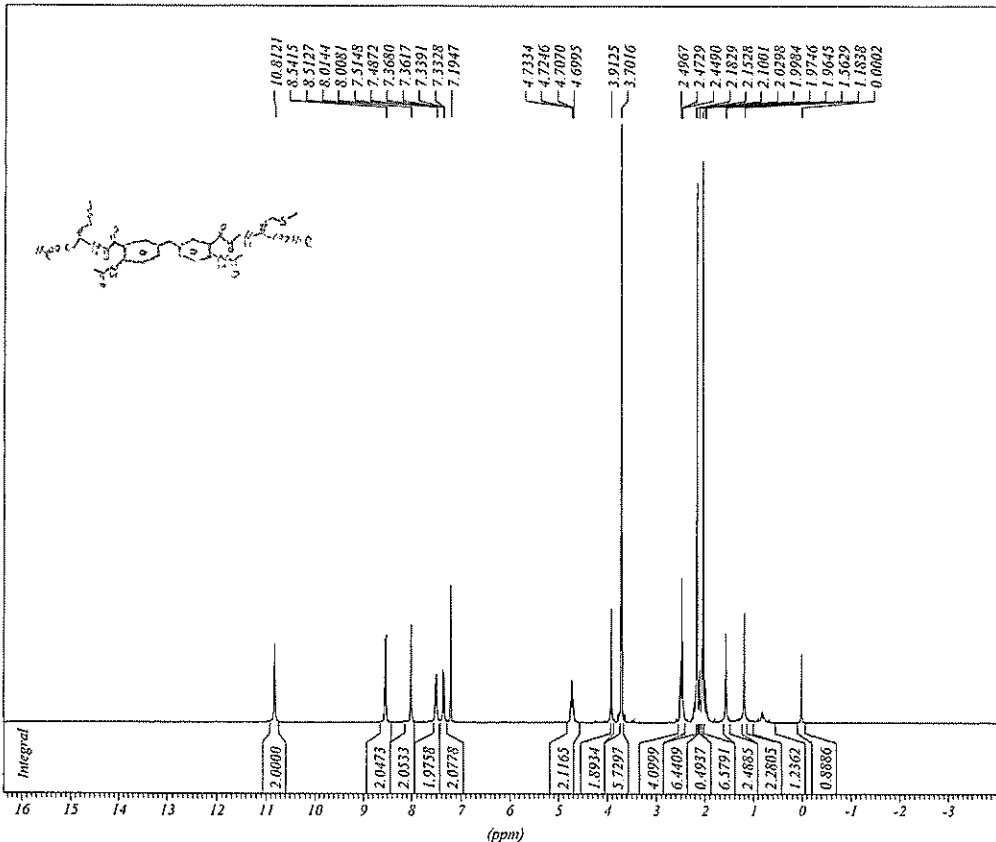

\*\*\* Current Data Parameters \*\*\*  
 NAME 01Z3DS-4  
 EXPNO 20  
 PROCNO 1

\*\*\* Acquisition Parameters \*\*\*  
 DATE\_ 19-33-13  
 DATE\_d Jul 14 2009  
 DS 2  
 LOCNUC 2H  
 NS 16  
 O1 1853.67 Hz  
 O2 1853.67 Hz  
 RG 456.1000061  
 SFO1 300.1718537 MHz  
 SOLVENT CDCl3  
 SW 20.5644 ppm  
 TD 32768  
 TE 298.2 K

\*\*\* Processing Parameters \*\*\*  
 LB 0.30 Hz  
 PC 1.00  
 SF 300.1700248 MHz  
 SI 16384

\*\*\* 1D NMR Plot Parameters \*\*\*  
 SR 24.82 Hz  
 SOLVENT ?

Supervisor Kumarmet+bisisatin4

COMPOUND 23

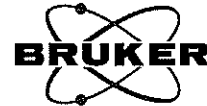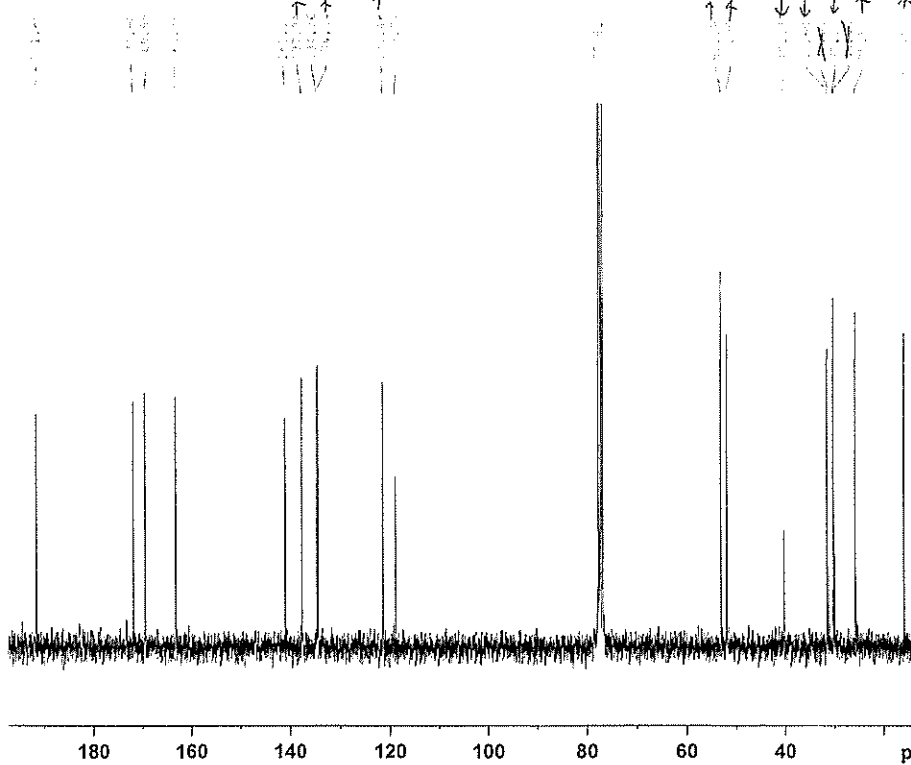

Current Data Parameters  
 NAME 090716-zzn  
 EXPNO 41  
 PROCNO 1

F2 - Acquisition Parameters  
 Date\_ 20090717  
 Time 7.19  
 INSTRUM dpx1  
 PROBHD 5 mm QNP 1H/13  
 PULPROG zgpg30  
 TD 65536  
 SOLVENT CDCl3  
 NS 2048  
 DE 2  
 SWH 23809.523 Hz  
 FIDRES 0.363304 Hz  
 AQ 1.3763061 sec  
 RG 16384  
 DW 21.000 usec  
 DE 25.00 usec  
 TE 300.2 K  
 D1 2.00000000 sec  
 d11 0.03000000 sec  
 DELTA 1.89999998 sec  
 TDO 1

----- CHANNEL f1 -----  
 NUC1 13C  
 P1 7.50 usec  
 PL1 -3.00 dB  
 SFO1 75.4873094 MHz

----- CHANNEL f2 -----  
 CPDPRG2 waltz16  
 NUC2 1H  
 PCPD2 105.00 usec  
 PL2 -3.00 dB  
 PL12 17.60 dB  
 PL13 23.60 dB  
 SFO2 300.1715008 MHz

F2 - Processing parameters  
 SI 32768  
 SF 75.4777770 MHz  
 WDM EM  
 SSB 0  
 LB 1.00 Hz  
 GB 0  
 PC 1.40

Supervisor Kumarbisisatin4 + val

COMPOUND 24

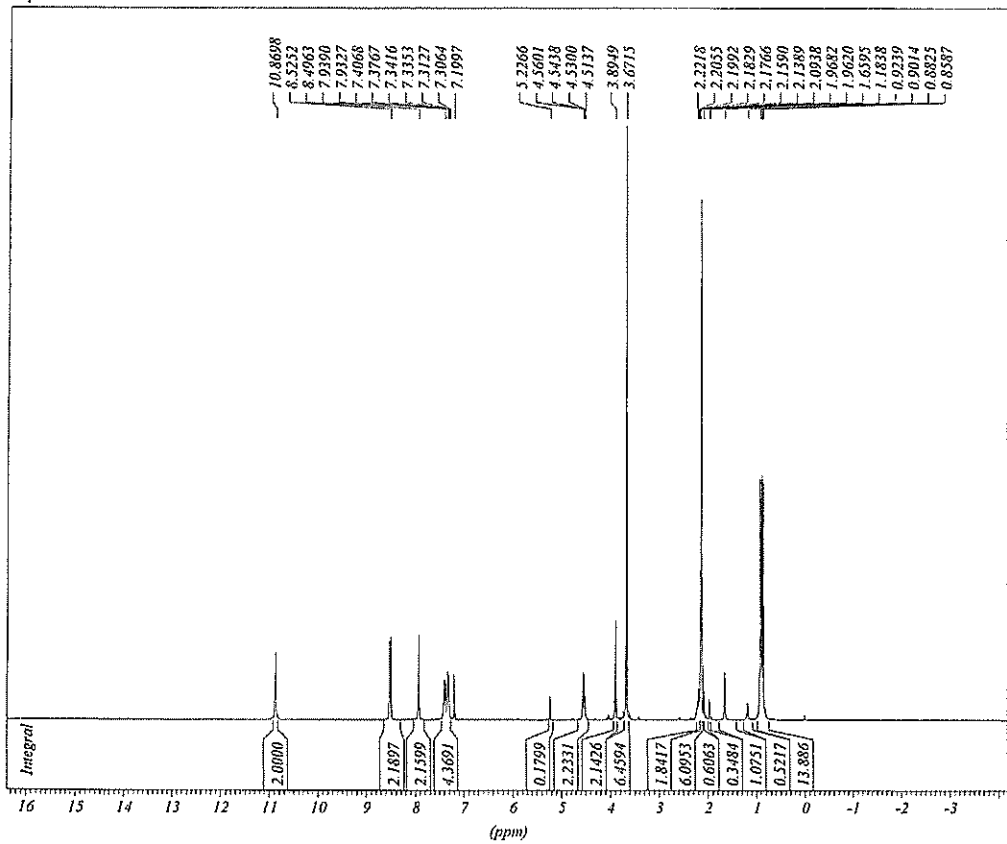

\*\*\* Current Data Parameters \*\*\*  
 NAME 0EE514-Q  
 EXPNO 20  
 PROCNO 1

\*\*\* Acquisition Parameters \*\*\*  
 DATE\_1 19-08-06  
 DATE\_d Jul 18 2009  
 DS 2  
 LOCNUC 2H  
 NS 16  
 O1 1853.67 Hz  
 O2 1853.67 Hz  
 RG 228.1000061  
 SFO1 300.1718537 MHz  
 SOLVENT CDCl3  
 SW 20.5644 ppm  
 TD 32768  
 TE 300.2 K

\*\*\* Processing Parameters \*\*\*  
 LB 0.30 Hz  
 PC 1.00  
 SF 300.1700233 MHz  
 SI 16384

\*\*\* 1D NMR Plot Parameters \*\*\*  
 SR 33.33 Hz  
 SOLVENT ?

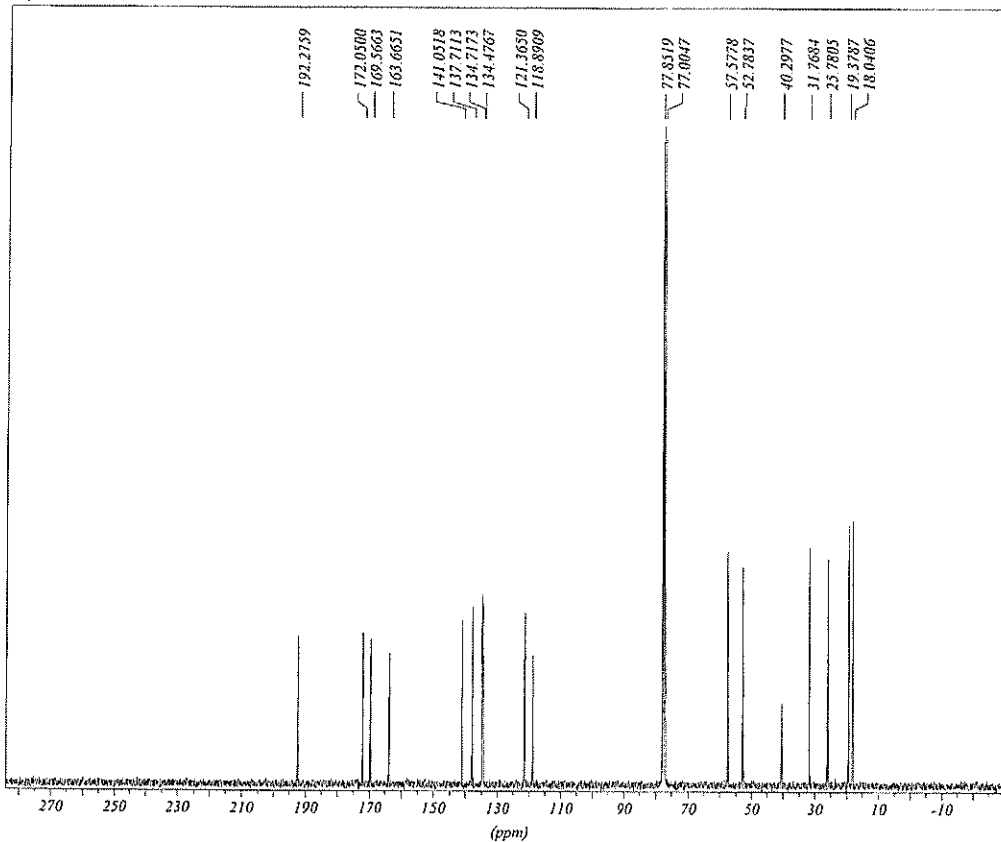

\*\*\* Current Data Parameters \*\*\*

NAME : 0EE14-Q  
EXPNO : 21  
PROCNO : 1

\*\*\* Acquisition Parameters \*\*\*

DATE\_t : 21-07-01  
DATE\_d : Jul 18 2009  
DS : 2  
LOCNUC : 2H  
NS : 2048  
O1 : 9532.38 Hz  
O2 : 1500.85 Hz  
RG : 14596.5000000  
SFO1 : 75.4873094 MHz  
SOLVENT : CDCl3  
SW : 315.4109 ppm  
TD : 65536  
TE : 300.2 K

\*\*\* Processing Parameters \*\*\*

LB : 1.00 Hz  
PC : 1.40  
SF : 75.4777770 MHz  
SI : 32768

\*\*\* 1D NMR Plot Parameters \*\*\*

SR : -0.00 Hz  
SOLVENT : ?

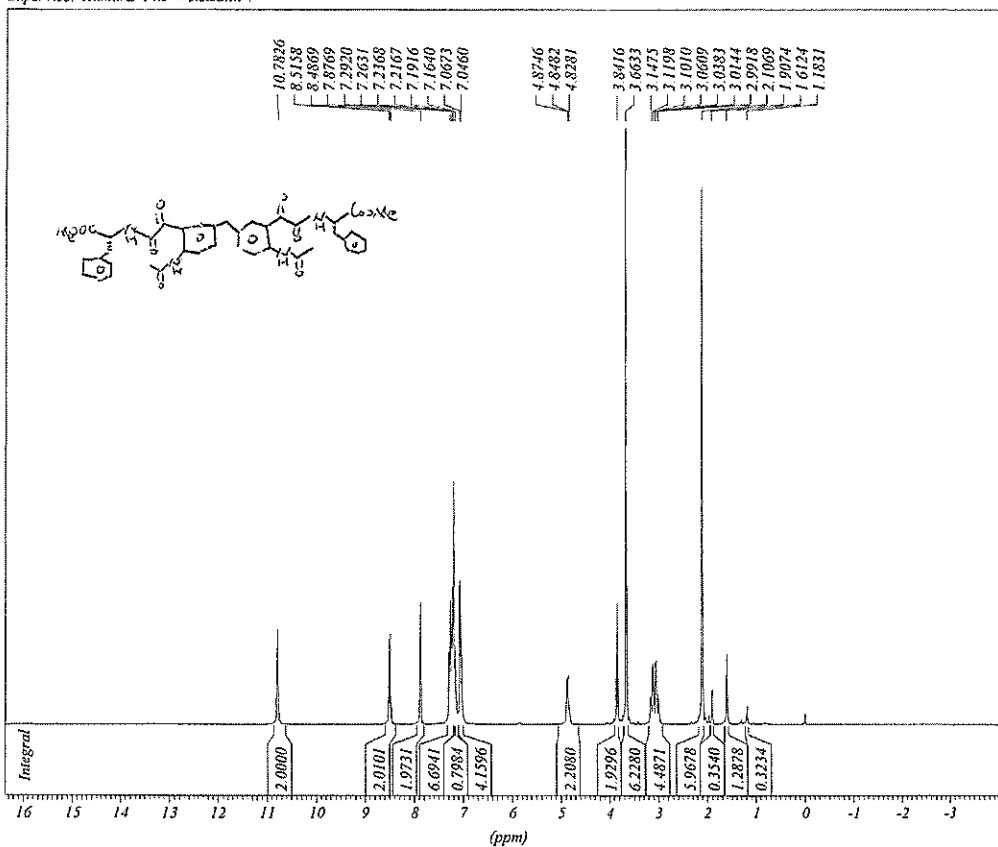

\*\*\* Current Data Parameters \*\*\*

NAME : 01Z3D8-4  
EXPNO : 40  
PROCNO : 1

\*\*\* Acquisition Parameters \*\*\*

DATE\_t : 18-16-48  
DATE\_d : Jul 15 2009  
DS : 2  
LOCNUC : 2H  
NS : 16  
O1 : 1853.67 Hz  
O2 : 1853.67 Hz  
RG : 256.0000000  
SFO1 : 300.1718537 MHz  
SOLVENT : CDCl3  
SW : 20.5644 ppm  
TD : 32768  
TE : 298.2 K

\*\*\* Processing Parameters \*\*\*

LB : 0.30 Hz  
PC : 1.00  
SF : 300.1700265 MHz  
SI : 16384

\*\*\* 1D NMR Plot Parameters \*\*\*

SR : 26.53 Hz  
SOLVENT : ?

COMPOUND 27

Supervisor Kumarbisatin 5+gly

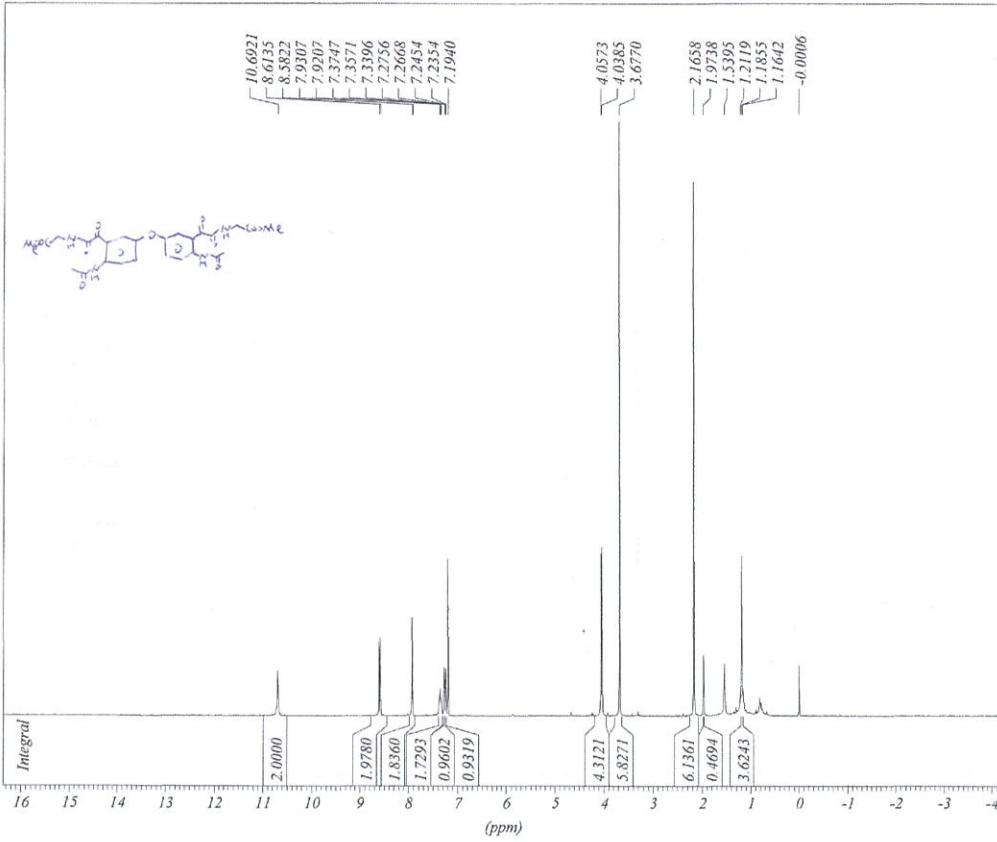

\*\*\* Current Data Parameters \*\*\*

NAME : 0G8YST-9  
EXPNO : 20  
PROCNO : 1

\*\*\* Acquisition Parameters \*\*\*

DATE\_1 : 14:37:03  
DATE\_d : Sep 23 2009  
DS : 2  
LOCNUC : 2H  
NS : 16  
O1 : 1853.67 Hz  
O2 : 1853.67 Hz  
RG : 574.7000122  
SFO1 : 300.1718537 MHz  
SOLVENT : CDCl3  
SW : 20.5644 ppm  
TD : 32768  
TE : 300.2 K

\*\*\* Processing Parameters \*\*\*

LB : 0.30 Hz  
PC : 1.00  
SF : 300.1700315 MHz  
SI : 16384

\*\*\* 1D NMR Plot Parameters \*\*\*

SR : 31.46 Hz  
SOLVENT : ?

32

COMPOUND 27

Supervisor Kumarbisatin 5+gly

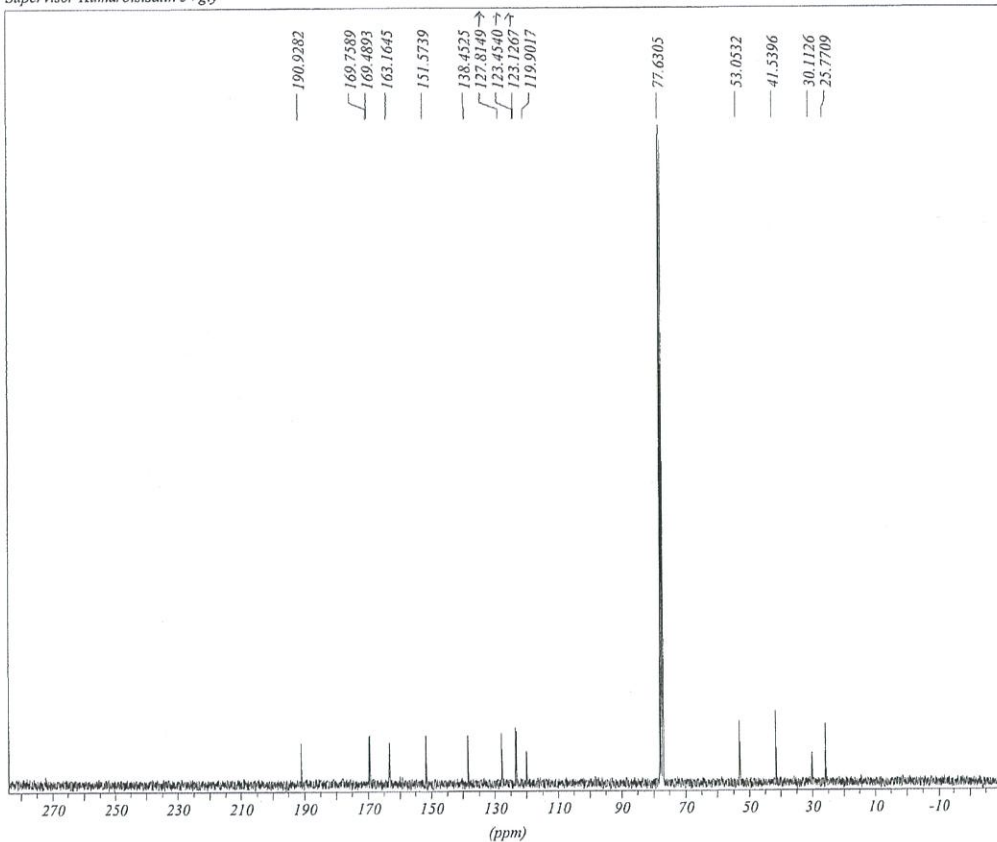

\*\*\* Current Data Parameters \*\*\*

NAME : 0G8YST-9  
EXPNO : 21  
PROCNO : 1

\*\*\* Acquisition Parameters \*\*\*

DATE\_1 : 16:05:59  
DATE\_d : Sep 23 2009  
DS : 2  
LOCNUC : 2H  
NS : 1536  
O1 : 9532.38 Hz  
O2 : 1500.85 Hz  
RG : 16384.0000000  
SFO1 : 75.4873094 MHz  
SOLVENT : CDCl3  
SW : 315.4109 ppm  
TD : 65536  
TE : 300.2 K

\*\*\* Processing Parameters \*\*\*

LB : 1.00 Hz  
PC : 1.40  
SF : 75.4777770 MHz  
SI : 32768

\*\*\* 1D NMR Plot Parameters \*\*\*

SR : -0.00 Hz  
SOLVENT : ?

27

Supervisor Kumar  
 bisisatin 5+ lev  
 1H CDC13 F Wzm 23

COMPOUND 28

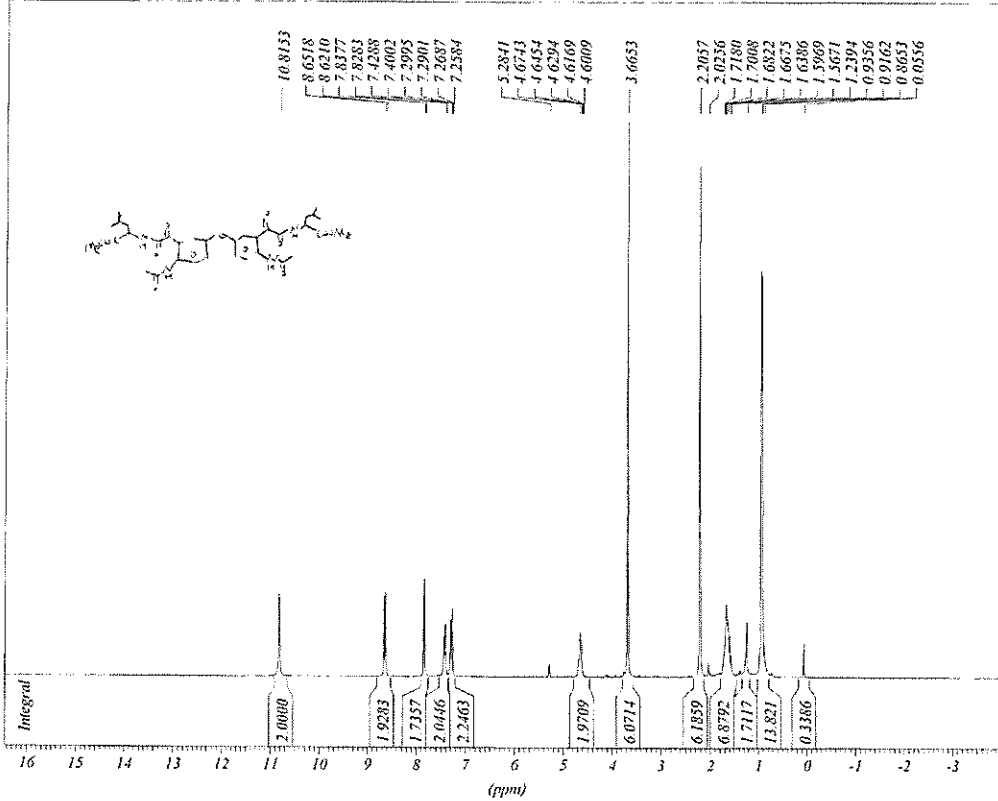

\*\*\* Current Data Parameters \*\*\*  
 NAME : 06WLV8-W  
 EXPNO : 1  
 PROCNO : 1

\*\*\* Acquisition Parameters \*\*\*  
 DATE\_1 : 01 45 26  
 DATE\_d : Oct 15 2009  
 DS : 4  
 LOCNUC : 2H  
 NS : 16  
 O1 : 1853.67 Hz  
 O2 : 0.00 Hz  
 RG : 71.8000631  
 SFO1 : 300.1318537 MHz  
 SOLVENT : CDCl3  
 SW : 20.5671 ppm  
 TD : 32768  
 TE : 297.5 K

\*\*\* Processing Parameters \*\*\*  
 LB : 0.30 Hz  
 PC : 1.00  
 SF : 300.1300071 MHz  
 SI : 65336

\*\*\* 1D NMR Plot Parameters \*\*\*  
 SR : 7.14 Hz  
 SOLVENT : ?

33

Supervisor Kumar  
 bisisatin 5+ lev  
 13C CDC13 F Wzm 23

COMPOUND 28

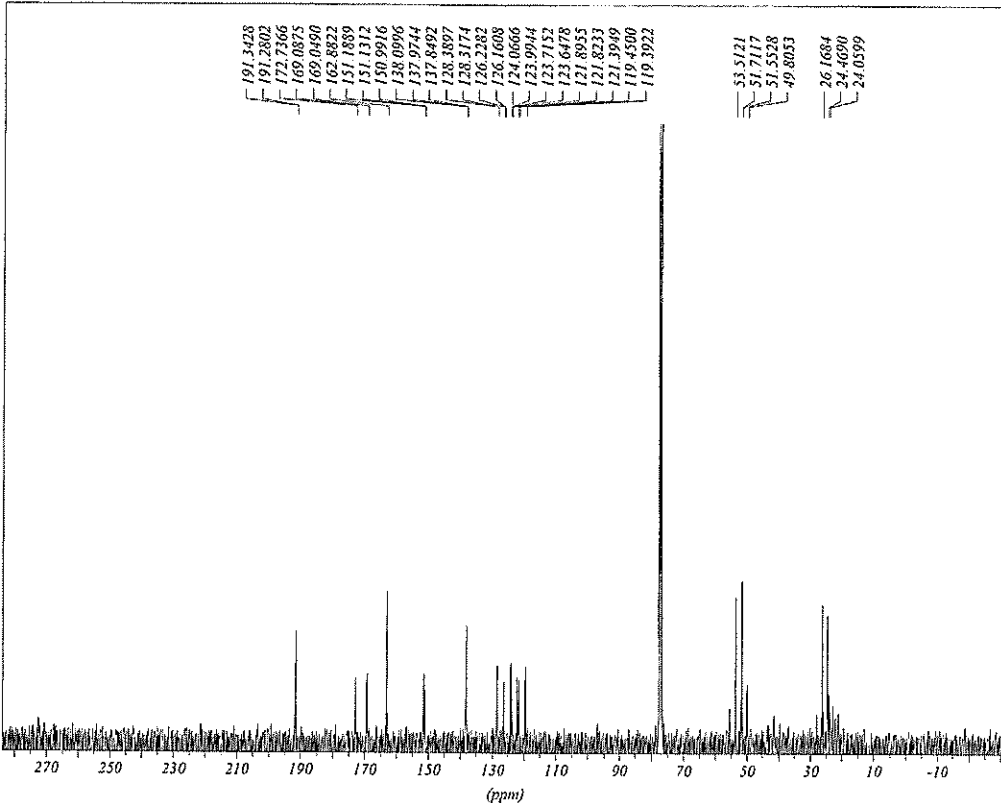

\*\*\* Current Data Parameters \*\*\*  
 NAME : 06WLV8-W  
 EXPNO : 2  
 PROCNO : 1

\*\*\* Acquisition Parameters \*\*\*  
 DATE\_1 : 03 43 09  
 DATE\_d : Oct 15 2009  
 DS : 0  
 LOCNUC : 13C  
 NS : 2048  
 O1 : 9502.00 Hz  
 O2 : 0.00 Hz  
 RG : 20642.5000000  
 SFO1 : 75.4772510 MHz  
 SOLVENT : CDCl3  
 SW : 315.4530 ppm  
 TD : 65536  
 TE : 298.4 K

\*\*\* Processing Parameters \*\*\*  
 LB : 1.00 Hz  
 PC : 1.40  
 SF : 75.4677485 MHz  
 SI : 65536

\*\*\* 1D NMR Plot Parameters \*\*\*  
 SR : -0.54 Hz  
 SOLVENT : ?

COMPOUND 29

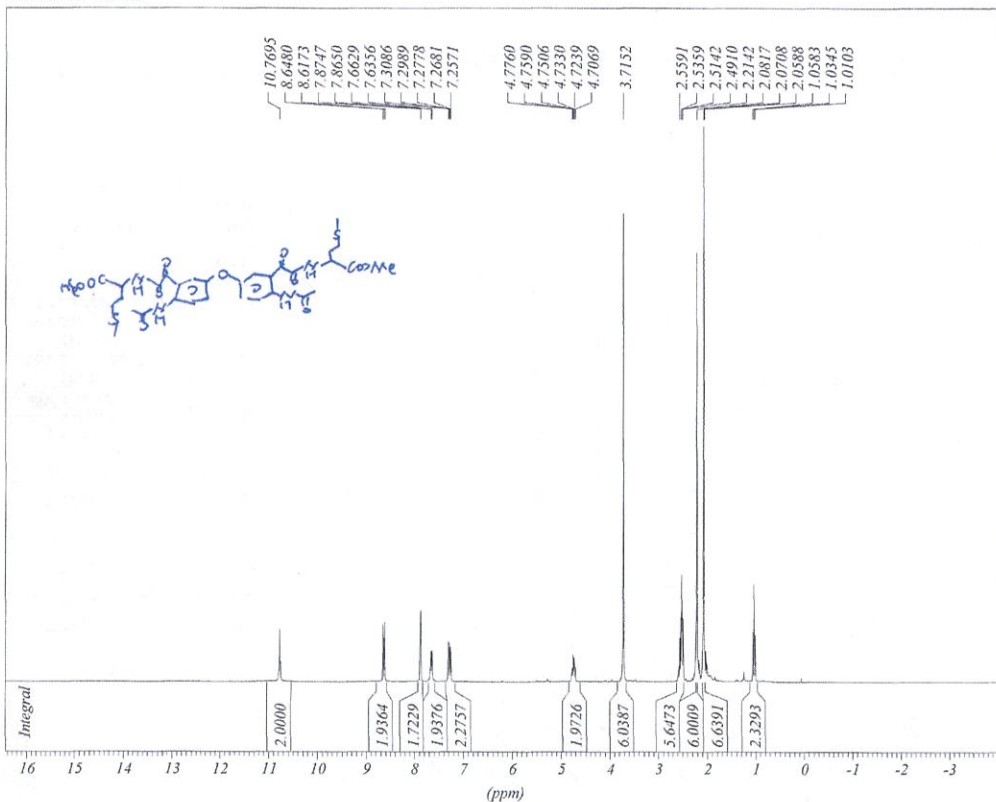

\*\*\* Current Data Parameters \*\*\*

NAME : OJSD3M-4  
EXPNO : 4  
PROCNO : 1

\*\*\* Acquisition Parameters \*\*\*

DATE\_1 : 13:36:42  
DATE\_d : Oct 19 2009  
DS : 4  
LOCNUC : 2H  
NS : 16  
O1 : 1853.67 Hz  
O2 : 0.00 Hz  
RG : 128.0000000  
SFO1 : 300.1318537 MHz  
SOLVENT : CDCl3  
SW : 20.5671 ppm  
TD : 32768  
TE : 297.8 K

\*\*\* Processing Parameters \*\*\*

LB : 0.30 Hz  
PC : 1.00  
SF : 300.1300071 MHz  
SI : 65536

\*\*\* 1D NMR Plot Parameters \*\*\*

SR : 7.14 Hz  
SOLVENT : ?

39

COMPOUND 29

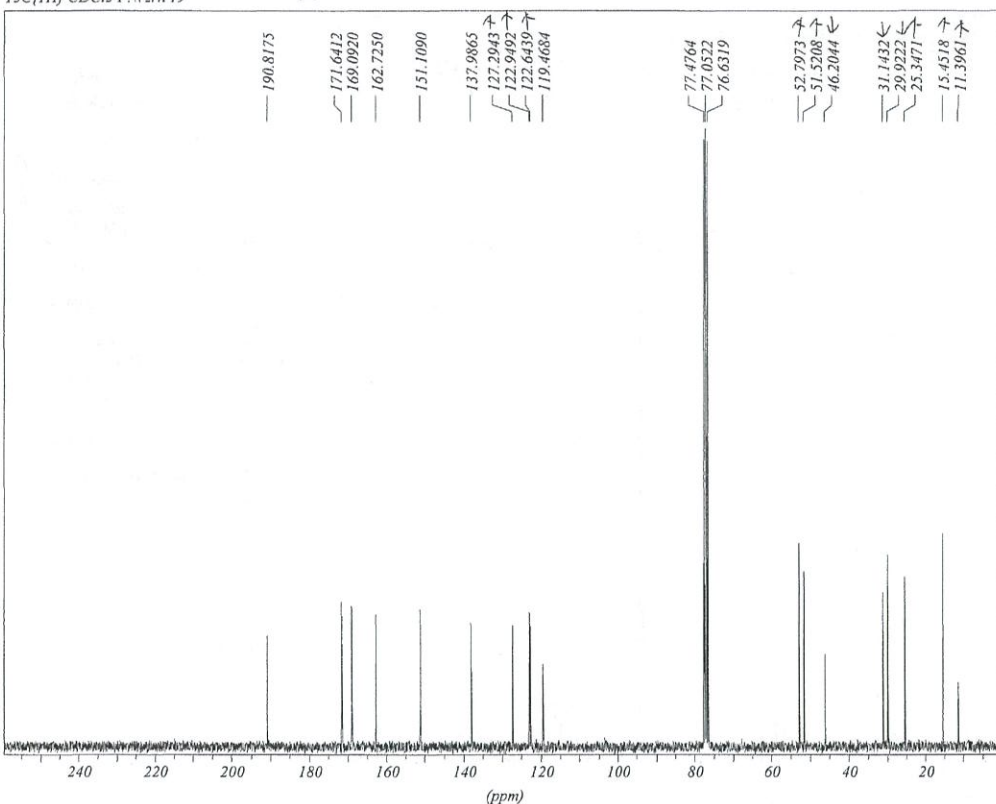

\*\*\* Current Data Parameters \*\*\*

NAME : OJSD3M-4  
EXPNO : 5  
PROCNO : 1

\*\*\* Acquisition Parameters \*\*\*

DATE\_1 : 14:42:15  
DATE\_d : Oct 19 2009  
DS : 0  
LOCNUC : 2H  
NS : 1024  
O1 : 9810.80 Hz  
O2 : 1500.85 Hz  
RG : 18390.4003906  
SFO1 : 75.4775298 MHz  
SOLVENT : CDCl3  
SW : 259.7838 ppm  
TD : 65536  
TE : 298.1 K

\*\*\* Processing Parameters \*\*\*

LB : 1.00 Hz  
PC : 1.40  
SF : 75.4677485 MHz  
SI : 65536

\*\*\* 1D NMR Plot Parameters \*\*\*

SR : 29.46 Hz  
SOLVENT : ?

Supervisor Kumar  
D-phe-bisatin5  
1H CDCl3 F Wzn 19

COMPOUND 30

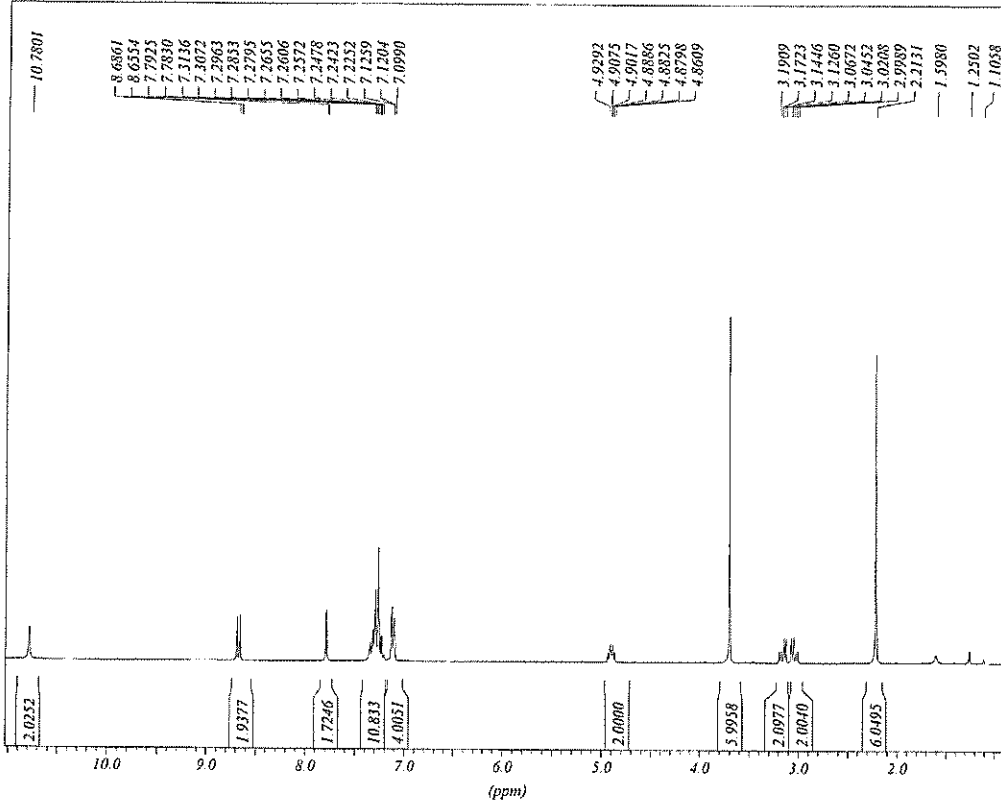

\*\*\* Current Data Parameters \*\*\*

NAME : OUZENS-A  
EXPNO : 1  
PROCNO : 1

\*\*\* Acquisition Parameters \*\*\*

DATE\_1 : 01:30:07  
DATE\_d : Oct 26 2009  
DS : 0  
LOCNUC : 2H  
NS : 16  
O1 : 2100.91 Hz  
O2 : 0.00 Hz  
RG : 322.5000000  
SFO1 : 300.1321009 MHz  
SOLVENT : CDCl3  
SW : 19.9752 ppm  
TD : 32768  
TE : 298.3 K

\*\*\* Processing Parameters \*\*\*

LB : 0.30 Hz  
PC : 1.00  
SF : 300.1300071 MHz  
SI : 65336

\*\*\* ID NMR Plot Parameters \*\*\*

SR : 7.14 Hz  
SOLVENT : ?

37

Supervisor Kumar  
D-phe-bisatin5  
13C{1H} CDCl3 F Wzn 19

COMPOUND 30

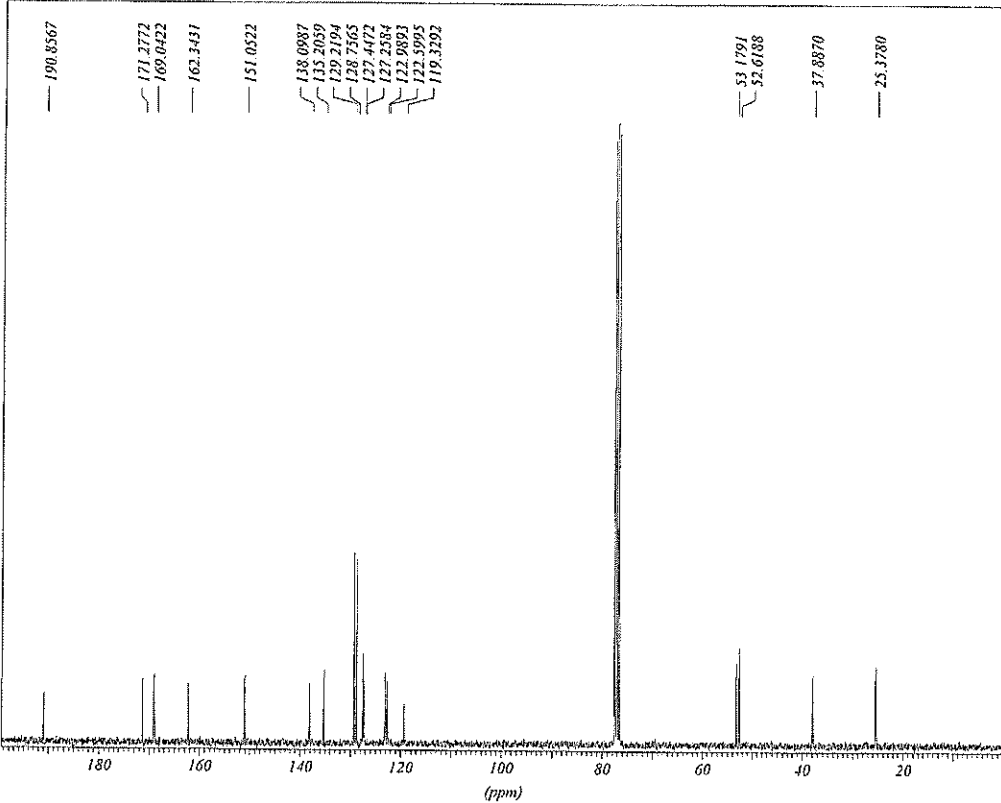

\*\*\* Current Data Parameters \*\*\*

NAME : OUZENS-A  
EXPNO : 2  
PROCNO : 1

\*\*\* Acquisition Parameters \*\*\*

DATE\_1 : 03:19:21  
DATE\_d : Oct 26 2009  
DS : 0  
LOCNUC : 2H  
NS : 2048  
O1 : 7546.77 Hz  
O2 : 1500.85 Hz  
RG : 14596.5000000  
SFO1 : 75.4752658 MHz  
SOLVENT : CDCl3  
SW : 199.5388 ppm  
TD : 32768  
TE : 298.3 K

\*\*\* Processing Parameters \*\*\*

LB : 1.00 Hz  
PC : 1.40  
SF : 75.4677485 MHz  
SI : 32768

\*\*\* ID NMR Plot Parameters \*\*\*

SR : 29.46 Hz  
SOLVENT : ?

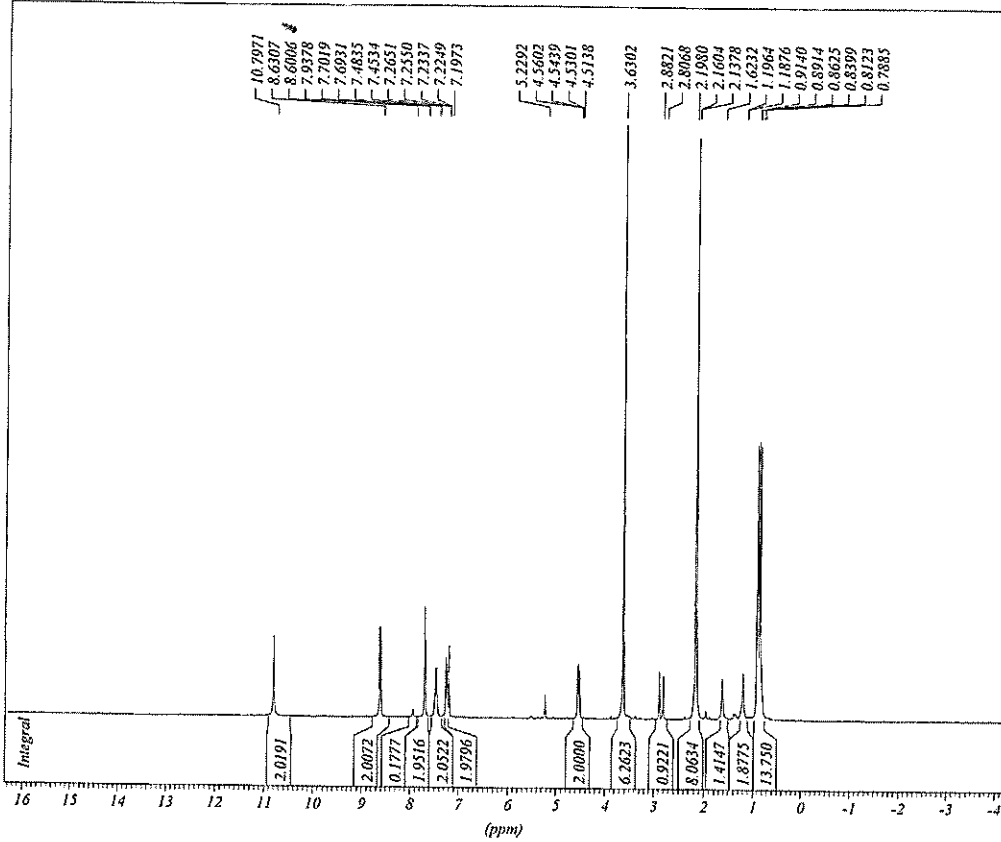

\*\*\* Current Data Parameters \*\*\*

NAME : 0MFJ40-Y  
 EXPNO : 10  
 PROCNO : 1

\*\*\* Acquisition Parameters \*\*\*

DATE\_1 : 12-57-52  
 DATE\_d : Sep 15 2009  
 DS : 2  
 LOCNUC : 2H  
 NS : 16  
 O1 : 1853.67 Hz  
 O2 : 1853.67 Hz  
 RG : 322.5000000  
 SFO1 : 300.1718537 MHz  
 SOLVENT : CDCl3  
 SW : 20.5644 ppm  
 TD : 32768  
 TE : 300.2 K

\*\*\* Processing Parameters \*\*\*

LB : 0.30 Hz  
 PC : 1.00  
 SF : 300.1700305 MHz  
 SI : 16384

\*\*\* 1D NMR Plot Parameters \*\*\*

SR : 30.46 Hz  
 SOLVENT : ?

36

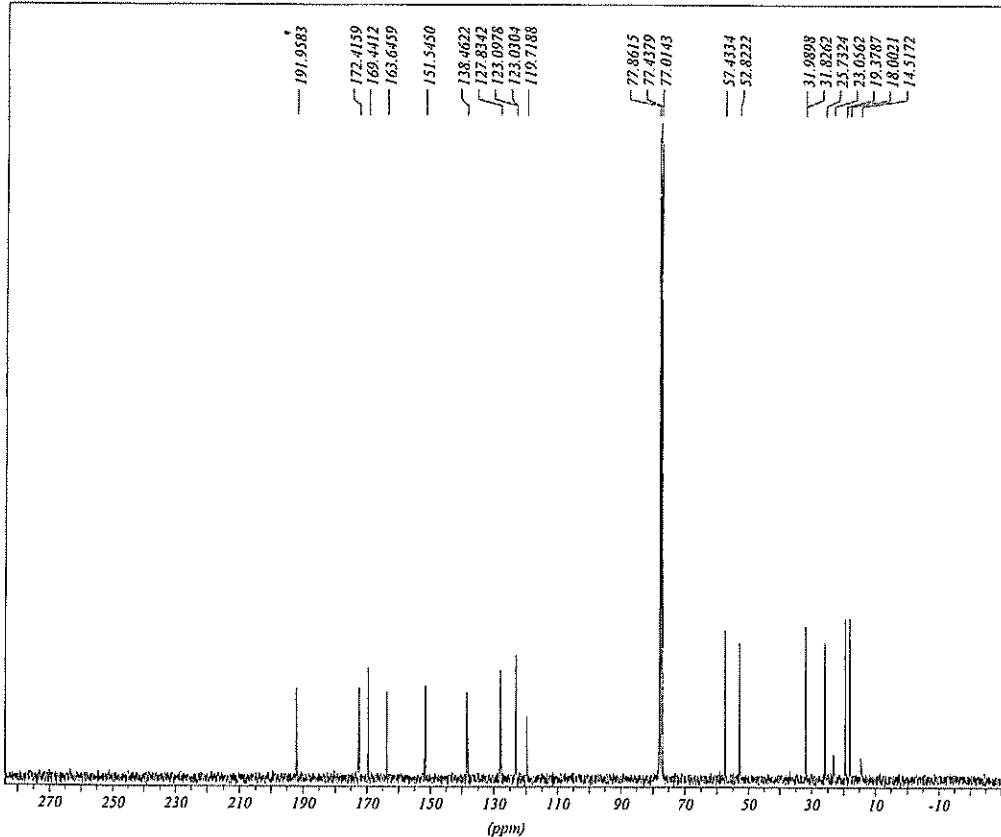

\*\*\* Current Data Parameters \*\*\*

NAME : 0MFJ40-Y  
 EXPNO : 11  
 PROCNO : 1

\*\*\* Acquisition Parameters \*\*\*

DATE\_1 : 14-26-48  
 DATE\_d : Sep 15 2009  
 DS : 2  
 LOCNUC : 2H  
 NS : 1536  
 O1 : 9532.38 Hz  
 O2 : 1500.85 Hz  
 RG : 16384.0000000  
 SFO1 : 75.4873094 MHz  
 SOLVENT : CDCl3  
 SW : 315.4109 ppm  
 TD : 65536  
 TE : 300.2 K

\*\*\* Processing Parameters \*\*\*

LB : 1.00 Hz  
 PC : 1.40  
 SF : 75.4777770 MHz  
 SI : 32768

\*\*\* 1D NMR Plot Parameters \*\*\*

SR : -0.00 Hz  
 SOLVENT : ?





COMPOUND 32

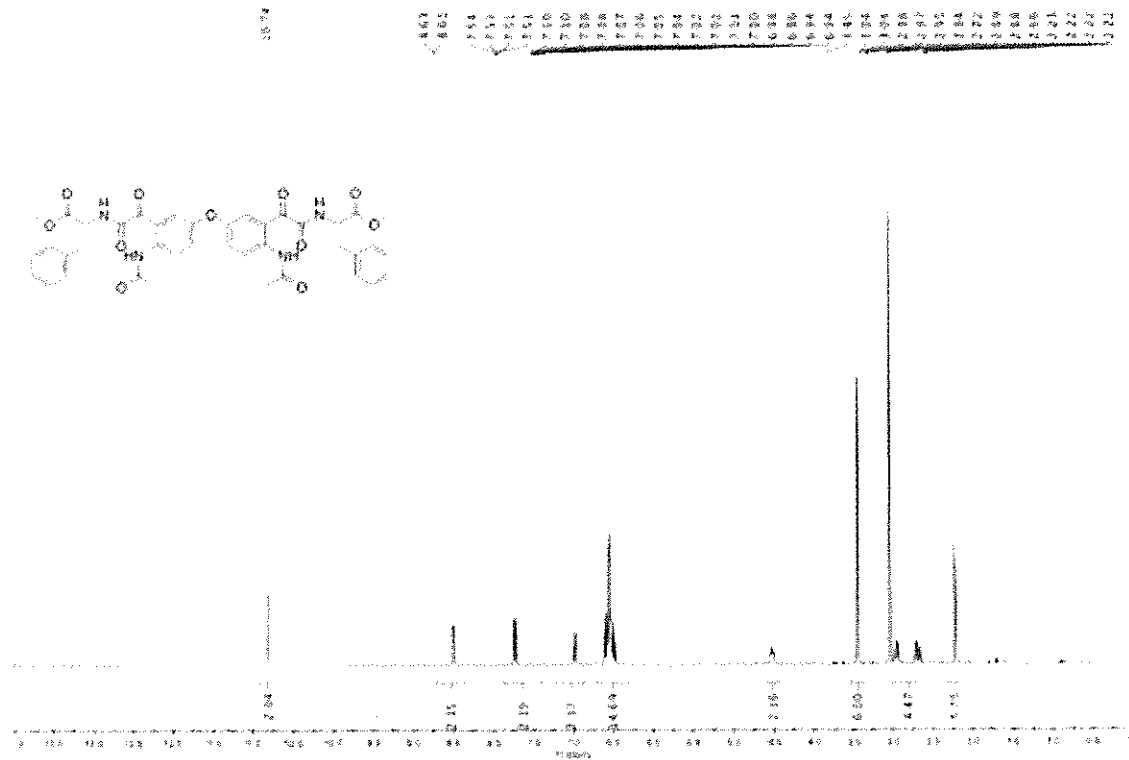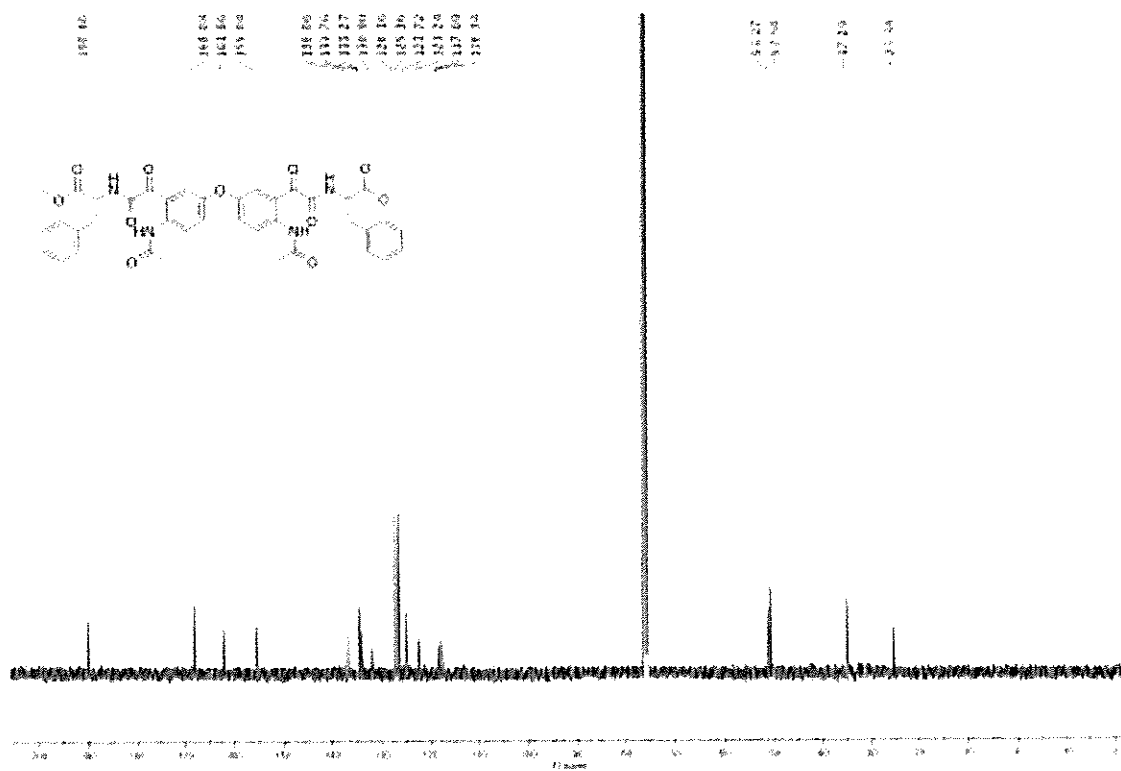

# checkCIF/PLATON report

Structure factors have been supplied for datablock(s) vs3arepro

THIS REPORT IS FOR GUIDANCE ONLY. IF USED AS PART OF A REVIEW PROCEDURE FOR PUBLICATION, IT SHOULD NOT REPLACE THE EXPERTISE OF AN EXPERIENCED CRYSTALLOGRAPHIC REFEREE.

No syntax errors found.      CIF dictionary      Interpreting this report

## Datablock: vs3arepro

---

Bond precision:    C-C = 0.0150 A

Wavelength=0.71073

Cell:                    a=23.015(5)                    b=31.326(6)                    c=4.984(1)  
                          alpha=90                    beta=90                    gamma=90  
Temperature:            100 K

|                        | Calculated                 | Reported       |
|------------------------|----------------------------|----------------|
| Volume                 | 3593.3(13)                 | 3593.3(12)     |
| Space group            | P 21 21 2                  | P 21 21 2      |
| Hall group             | P 2 2ab                    | P 2 2ab        |
| Moiety formula         | C35 H42 N4 O10 [+ solvent] | C35 H42 N4 O10 |
| Sum formula            | C35 H42 N4 O10 [+ solvent] | C35 H42 N4 O10 |
| Mr                     | 678.73                     | 678.72         |
| Dx, g cm <sup>-3</sup> | 1.255                      | 1.255          |
| Z                      | 4                          | 4              |
| Mu (mm <sup>-1</sup> ) | 0.093                      | 0.093          |
| F000                   | 1440.0                     | 1440.0         |
| F000'                  | 1440.75                    |                |
| h, k, lmax             | 26, 35, 5                  | 26, 35, 5      |
| Nref                   | 5588[ 3284]                | 5471           |
| Tmin, Tmax             | 0.999, 0.999               |                |
| Tmin'                  | 0.999                      |                |

Correction method= Not given

Data completeness= 1.67/0.98                    Theta(max)= 23.885

R(reflections)= 0.1380( 4913)                    wR2(reflections)= 0.3602( 5471)

S = 1.571

Npar= 446

---

The following ALERTS were generated. Each ALERT has the format

**test-name\_ALERT\_alert-type\_alert-level.**

Click on the hyperlinks for more details of the test.

---

**Alert level B**

THETM01\_ALERT\_3\_B The value of  $\sin(\theta_{\max})/\lambda$  is less than 0.575  
Calculated  $\sin(\theta_{\max})/\lambda = 0.5697$   
PLAT084\_ALERT\_3\_B High  $wR_2$  Value (i.e.  $> 0.25$ ) ..... 0.36 Report

**Author Response: Crystals were ultra thin and could be only measured for diffraction at Australian Synchrotron. Even with the synchrotron radiation they diffracted only to lower angles. So, the alerts arising at level B below are due to weak diffraction, disordered L-leu moities and possible presence of partially occupied water molecule in the crystal lattice.**

PLAT097\_ALERT\_2\_B Large Reported Max. (Positive) Residual Density 0.81 eA<sup>-3</sup>

**Author Response: as explained above**

PLAT340\_ALERT\_3\_B Low Bond Precision on C-C Bonds ..... 0.01504 Ang.

**Author Response: as explained above**

PLAT369\_ALERT\_2\_B Long C(sp<sup>2</sup>)-C(sp<sup>2</sup>) Bond C9B - C10B . 1.57 Ang.

**Author Response: as explained above**

---

**Alert level C**

DIFMX02\_ALERT\_1\_C The maximum difference density is  $> 0.1 \cdot Z_{\max} \cdot 0.75$   
The relevant atom site should be identified.  
RINTA01\_ALERT\_3\_C The value of  $R_{\text{int}}$  is greater than 0.12  
 $R_{\text{int}}$  given 0.120  
STRVA01\_ALERT\_4\_C Flack test results are meaningless.  
From the CIF:  $_{\text{refine\_ls\_abs\_structure\_Flack}}$  0.300  
From the CIF:  $_{\text{refine\_ls\_abs\_structure\_Flack\_su}}$  0.700  
PLAT082\_ALERT\_2\_C High  $R_1$  Value ..... 0.14 Report  
PLAT089\_ALERT\_3\_C Poor Data / Parameter Ratio ( $Z_{\max} < 18$ ) ..... 7.23 Note  
PLAT213\_ALERT\_2\_C Atom C13B has ADP max/min Ratio ..... 3.3 prolat  
PLAT220\_ALERT\_2\_C Non-Solvent Resd 1 C  $U_{\text{eq}}(\max)/U_{\text{eq}}(\min)$  Range 5.1 Ratio  
PLAT222\_ALERT\_3\_C Non-Solv. Resd 1 H  $U_{\text{iso}}(\max)/U_{\text{iso}}(\min)$  Range 6.4 Ratio  
PLAT234\_ALERT\_4\_C Large Hirshfeld Difference O3A --C10A . 0.16 Ang.  
PLAT234\_ALERT\_4\_C Large Hirshfeld Difference O4A --C12A . 0.17 Ang.  
PLAT234\_ALERT\_4\_C Large Hirshfeld Difference C5A --C6A . 0.16 Ang.  
PLAT234\_ALERT\_4\_C Large Hirshfeld Difference C11A --C12A . 0.19 Ang.  
PLAT241\_ALERT\_2\_C High 'MainMol'  $U_{\text{eq}}$  as Compared to Neighbors of C7B Check  
PLAT241\_ALERT\_2\_C High 'MainMol'  $U_{\text{eq}}$  as Compared to Neighbors of C14A Check  
PLAT242\_ALERT\_2\_C Low 'MainMol'  $U_{\text{eq}}$  as Compared to Neighbors of O5B Check  
PLAT242\_ALERT\_2\_C Low 'MainMol'  $U_{\text{eq}}$  as Compared to Neighbors of N1B Check  
PLAT242\_ALERT\_2\_C Low 'MainMol'  $U_{\text{eq}}$  as Compared to Neighbors of C7A Check  
PLAT242\_ALERT\_2\_C Low 'MainMol'  $U_{\text{eq}}$  as Compared to Neighbors of C11A Check  
PLAT329\_ALERT\_4\_C Carbon Atom Hybridisation Unclear for ..... C14B Check  
PLAT369\_ALERT\_2\_C Long C(sp<sup>2</sup>)-C(sp<sup>2</sup>) Bond C9A - C10A . 1.53 Ang.

## Author Response: as explained above

|                   |                                                  |       |        |
|-------------------|--------------------------------------------------|-------|--------|
| PLAT906_ALERT_3_C | Large K Value in the Analysis of Variance .....  | 2.950 | Check  |
| PLAT911_ALERT_3_C | Missing FCF Refl Between Thmin & STh/L= 0.570    | 55    | Report |
| PLAT913_ALERT_3_C | Missing # of Very Strong Reflections in FCF .... | 7     | Note   |
| PLAT934_ALERT_3_C | Number of (Iobs-Icalc)/Sigma(W) > 10 Outliers .. | 1     | Check  |
| PLAT975_ALERT_2_C | Check Calcd Resid. Dens. 0.90A From O3A          | 0.78  | eA-3   |
| PLAT977_ALERT_2_C | Check Negative Difference Density on H15B        | -0.31 | eA-3   |
| PLAT978_ALERT_2_C | Number C-C Bonds with Positive Residual Density. | 0     | Info   |

---

### ● Alert level G

|                   |                                                  |       |        |
|-------------------|--------------------------------------------------|-------|--------|
| PLAT002_ALERT_2_G | Number of Distance or Angle Restraints on AtSite | 13    | Note   |
| PLAT003_ALERT_2_G | Number of Uiso or Uij Restrained non-H Atoms ... | 4     | Report |
| PLAT007_ALERT_5_G | Number of Unrefined Donor-H Atoms .....          | 4     | Report |
| PLAT032_ALERT_4_G | Std. Uncertainty on Flack Parameter Value High . | 0.700 | Report |
| PLAT072_ALERT_2_G | SHELXL First Parameter in WGHT Unusually Large   | 0.20  | Report |
| PLAT171_ALERT_4_G | The CIF-Embedded .res File Contains EADP Records | 9     | Report |
| PLAT172_ALERT_4_G | The CIF-Embedded .res File Contains DFIX Records | 17    | Report |
| PLAT176_ALERT_4_G | The CIF-Embedded .res File Contains SADI Records | 1     | Report |
| PLAT187_ALERT_4_G | The CIF-Embedded .res File Contains RIGU Records | 3     | Report |
| PLAT300_ALERT_4_G | Atom Site Occupancy of C15' Constrained at       | 0.5   | Check  |
| PLAT300_ALERT_4_G | Atom Site Occupancy of C15B Constrained at       | 0.5   | Check  |
| PLAT300_ALERT_4_G | Atom Site Occupancy of C16' Constrained at       | 0.5   | Check  |
| PLAT300_ALERT_4_G | Atom Site Occupancy of C16" Constrained at       | 0.5   | Check  |
| PLAT300_ALERT_4_G | Atom Site Occupancy of C16A Constrained at       | 0.5   | Check  |
| PLAT300_ALERT_4_G | Atom Site Occupancy of C16B Constrained at       | 0.5   | Check  |
| PLAT300_ALERT_4_G | Atom Site Occupancy of C17' Constrained at       | 0.5   | Check  |
| PLAT300_ALERT_4_G | Atom Site Occupancy of C17" Constrained at       | 0.5   | Check  |
| PLAT300_ALERT_4_G | Atom Site Occupancy of C17A Constrained at       | 0.5   | Check  |
| PLAT300_ALERT_4_G | Atom Site Occupancy of C17B Constrained at       | 0.5   | Check  |
| PLAT300_ALERT_4_G | Atom Site Occupancy of H14C Constrained at       | 0.5   | Check  |
| PLAT300_ALERT_4_G | Atom Site Occupancy of H14D Constrained at       | 0.5   | Check  |
| PLAT300_ALERT_4_G | Atom Site Occupancy of H15' Constrained at       | 0.5   | Check  |
| PLAT300_ALERT_4_G | Atom Site Occupancy of H15A Constrained at       | 0.5   | Check  |
| PLAT300_ALERT_4_G | Atom Site Occupancy of H15B Constrained at       | 0.5   | Check  |
| PLAT300_ALERT_4_G | Atom Site Occupancy of H15C Constrained at       | 0.5   | Check  |
| PLAT300_ALERT_4_G | Atom Site Occupancy of H16A Constrained at       | 0.5   | Check  |
| PLAT300_ALERT_4_G | Atom Site Occupancy of H16B Constrained at       | 0.5   | Check  |
| PLAT300_ALERT_4_G | Atom Site Occupancy of H16C Constrained at       | 0.5   | Check  |
| PLAT300_ALERT_4_G | Atom Site Occupancy of H16D Constrained at       | 0.5   | Check  |
| PLAT300_ALERT_4_G | Atom Site Occupancy of H16E Constrained at       | 0.5   | Check  |
| PLAT300_ALERT_4_G | Atom Site Occupancy of H16F Constrained at       | 0.5   | Check  |
| PLAT300_ALERT_4_G | Atom Site Occupancy of H16G Constrained at       | 0.5   | Check  |
| PLAT300_ALERT_4_G | Atom Site Occupancy of H16H Constrained at       | 0.5   | Check  |
| PLAT300_ALERT_4_G | Atom Site Occupancy of H16I Constrained at       | 0.5   | Check  |
| PLAT300_ALERT_4_G | Atom Site Occupancy of H16J Constrained at       | 0.5   | Check  |
| PLAT300_ALERT_4_G | Atom Site Occupancy of H16K Constrained at       | 0.5   | Check  |
| PLAT300_ALERT_4_G | Atom Site Occupancy of H16L Constrained at       | 0.5   | Check  |
| PLAT300_ALERT_4_G | Atom Site Occupancy of H17A Constrained at       | 0.5   | Check  |
| PLAT300_ALERT_4_G | Atom Site Occupancy of H17B Constrained at       | 0.5   | Check  |
| PLAT300_ALERT_4_G | Atom Site Occupancy of H17C Constrained at       | 0.5   | Check  |
| PLAT300_ALERT_4_G | Atom Site Occupancy of H17D Constrained at       | 0.5   | Check  |
| PLAT300_ALERT_4_G | Atom Site Occupancy of H17E Constrained at       | 0.5   | Check  |
| PLAT300_ALERT_4_G | Atom Site Occupancy of H17F Constrained at       | 0.5   | Check  |
| PLAT300_ALERT_4_G | Atom Site Occupancy of H17G Constrained at       | 0.5   | Check  |
| PLAT300_ALERT_4_G | Atom Site Occupancy of H17H Constrained at       | 0.5   | Check  |
| PLAT300_ALERT_4_G | Atom Site Occupancy of H17I Constrained at       | 0.5   | Check  |
| PLAT300_ALERT_4_G | Atom Site Occupancy of H17J Constrained at       | 0.5   | Check  |
| PLAT300_ALERT_4_G | Atom Site Occupancy of H17K Constrained at       | 0.5   | Check  |

|                   |                                                  |                                    |             |             |
|-------------------|--------------------------------------------------|------------------------------------|-------------|-------------|
| PLAT300_ALERT_4_G | Atom Site Occupancy of H17L                      | Constrained at                     | 0.5         | Check       |
| PLAT301_ALERT_3_G | Main Residue Disorder .....                      | (Resd 1 )                          | 10%         | Note        |
| PLAT343_ALERT_2_G | Unusual                                          | sp?Angle Range in Main Residue for | C11A        | Check       |
| PLAT367_ALERT_2_G | Long?                                            | C(sp?)-C(sp?) Bond                 | C11A - C12A | 1.56 Ang.   |
| PLAT367_ALERT_2_G | Long?                                            | C(sp?)-C(sp?) Bond                 | C11A - C14A | 1.56 Ang.   |
| PLAT412_ALERT_2_G | Short Intra XH3 ..                               | XHn H14B ..H17C                    | .           | 2.09 Ang.   |
|                   |                                                  | x,y,z =                            | 1_555       | Check       |
| PLAT413_ALERT_2_G | Short Inter XH3 ..                               | XHn H14A ..H17K                    | .           | 2.14 Ang.   |
|                   |                                                  | x,y,1+z =                          | 1_556       | Check       |
| PLAT432_ALERT_2_G | Short Inter X...Y Contact                        | O3A ..C12A                         |             | 2.88 Ang.   |
|                   |                                                  | x,y,-1+z =                         | 1_554       | Check       |
| PLAT605_ALERT_4_G | Largest Solvent Accessible VOID in the Structure |                                    | 56          | A**3        |
| PLAT720_ALERT_4_G | Number of Unusual/Non-Standard Labels .....      |                                    | 8           | Note        |
| PLAT791_ALERT_4_G | Model has Chirality at C11B                      | (Chiral SPGR)                      |             | R Verify    |
| PLAT860_ALERT_3_G | Number of Least-Squares Restraints .....         |                                    | 29          | Note        |
| PLAT868_ALERT_4_G | ALERTS Due to the Use of _smtbx_masks Suppressed |                                    |             | ! Info      |
| PLAT883_ALERT_1_G | No Info/Value for _atom_sites_solution_primary   |                                    |             | Please Do ! |
| PLAT909_ALERT_3_G | Percentage of I>2sig(I) Data at Theta(Max) Still |                                    | 62%         | Note        |
| PLAT910_ALERT_3_G | Missing # of FCF Reflection(s) Below Theta(Min). |                                    | 4           | Note        |
| PLAT933_ALERT_2_G | Number of OMIT Records in Embedded .res File ... |                                    | 7           | Note        |

---

0 **ALERT level A** = Most likely a serious problem - resolve or explain  
5 **ALERT level B** = A potentially serious problem, consider carefully  
27 **ALERT level C** = Check. Ensure it is not caused by an omission or oversight  
65 **ALERT level G** = General information/check it is not something unexpected

2 ALERT type 1 CIF construction/syntax error, inconsistent or missing data  
25 ALERT type 2 Indicator that the structure model may be wrong or deficient  
14 ALERT type 3 Indicator that the structure quality may be low  
55 ALERT type 4 Improvement, methodology, query or suggestion  
1 ALERT type 5 Informative message, check

---

### Validation response form

Please find below a validation response form (VRF) that can be filled in and pasted into your CIF.

```
# start Validation Reply Form
_vrf_THETM01_vs3arepro
;
PROBLEM: The value of sine(theta_max)/wavelength is less than 0.575
RESPONSE: ...
;
# end Validation Reply Form
```

---

It is advisable to attempt to resolve as many as possible of the alerts in all categories. Often the minor alerts point to easily fixed oversights, errors and omissions in your CIF or refinement strategy, so attention to these fine details can be worthwhile. In order to resolve some of the more serious problems it may be necessary to carry out additional measurements or structure refinements. However, the purpose of your study may justify the reported deviations and the more serious of these should normally be commented upon in the discussion or experimental section of a paper or in the "special\_details" fields of the CIF. checkCIF was carefully designed to identify outliers and unusual parameters, but every test has its limitations and alerts that are not important in a particular case may appear. Conversely, the absence of alerts does not guarantee there are no aspects of the results needing attention. It is up to the individual to critically assess their own results and, if necessary, seek expert advice.

### **Publication of your CIF in IUCr journals**

A basic structural check has been run on your CIF. These basic checks will be run on all CIFs submitted for publication in IUCr journals (*Acta Crystallographica*, *Journal of Applied Crystallography*, *Journal of Synchrotron Radiation*); however, if you intend to submit to *Acta Crystallographica Section C* or *E* or *IUCrData*, you should make sure that full publication checks are run on the final version of your CIF prior to submission.

### **Publication of your CIF in other journals**

Please refer to the *Notes for Authors* of the relevant journal for any special instructions relating to CIF submission.

---

**PLATON version of 07/08/2019; check.def file version of 30/07/2019**

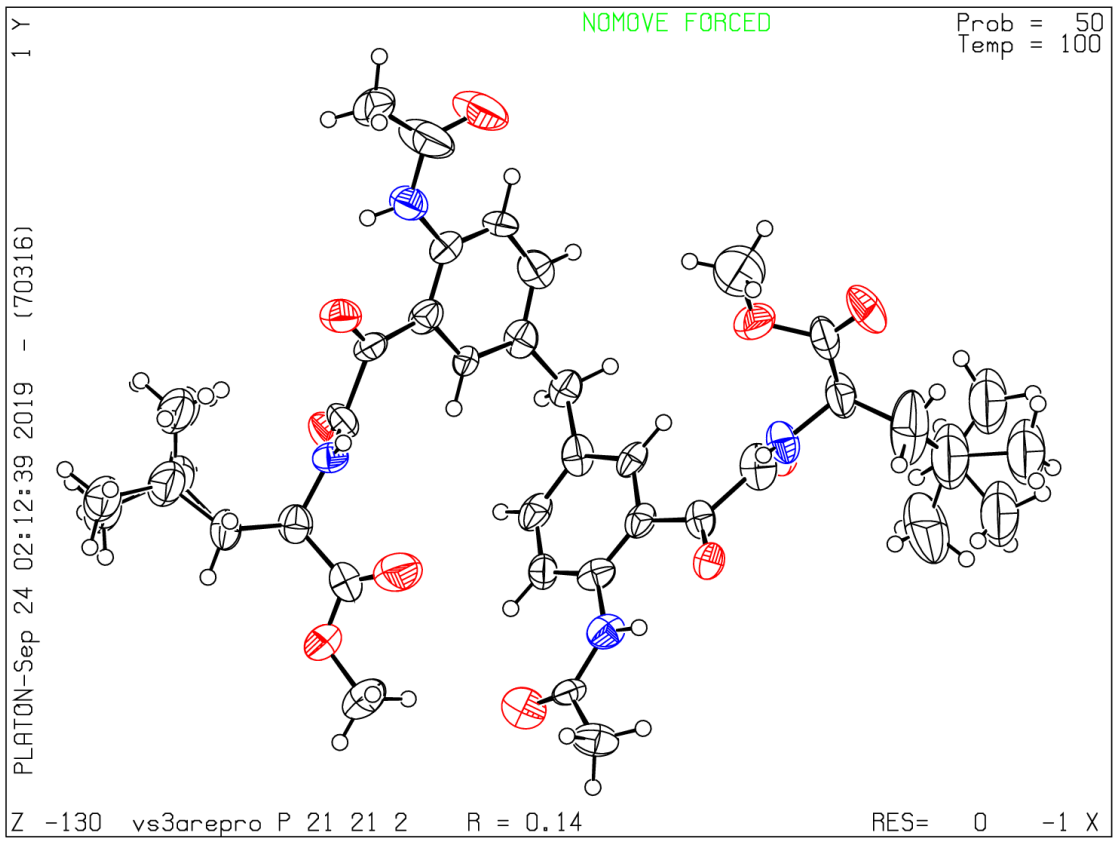





The following ALERTS were generated. Each ALERT has the format

**test-name\_ALERT\_alert-type\_alert-level.**

Click on the hyperlinks for more details of the test.

---

**Alert level B**

THETM01\_ALERT\_3\_B The value of  $\sin(\theta_{\max})/\lambda$  is less than 0.575  
Calculated  $\sin(\theta_{\max})/\lambda = 0.5691$

**Author Response: Crystals were ultrathin which diffracted very weakly at high angles even in the synchrotron beam at Australian MX1 beam line.**

---

**Alert level C**

|                   |                                                                |         |        |
|-------------------|----------------------------------------------------------------|---------|--------|
| PLAT089_ALERT_3_C | Poor Data / Parameter Ratio (Zmax < 18) .....                  | 6.88    | Note   |
| PLAT340_ALERT_3_C | Low Bond Precision on C-C Bonds .....                          | 0.00564 | Ang.   |
| PLAT369_ALERT_2_C | Long C(sp <sup>2</sup> )-C(sp <sup>2</sup> ) Bond C9A - C10A . | 1.55    | Ang.   |
| PLAT369_ALERT_2_C | Long C(sp <sup>2</sup> )-C(sp <sup>2</sup> ) Bond C9B - C10B . | 1.54    | Ang.   |
| PLAT911_ALERT_3_C | Missing FCF Refl Between Thmin & STh/L= 0.569                  | 10      | Report |
| PLAT913_ALERT_3_C | Missing # of Very Strong Reflections in FCF ....               | 4       | Note   |

---

**Alert level G**

|                   |                                                  |      |              |
|-------------------|--------------------------------------------------|------|--------------|
| PLAT007_ALERT_5_G | Number of Unrefined Donor-H Atoms .....          | 4    | Report       |
| PLAT042_ALERT_1_G | Calc. and Reported MoietyFormula Strings Differ  |      | Please Check |
| PLAT045_ALERT_1_G | Calculated and Reported Z Differ by a Factor ... | 0.50 | Check        |
| PLAT300_ALERT_4_G | Atom Site Occupancy of H1MA Constrained at       | 0.5  | Check        |
| PLAT300_ALERT_4_G | Atom Site Occupancy of H1MB Constrained at       | 0.5  | Check        |
| PLAT300_ALERT_4_G | Atom Site Occupancy of H1NA Constrained at       | 0.5  | Check        |
| PLAT300_ALERT_4_G | Atom Site Occupancy of H1NB Constrained at       | 0.5  | Check        |
| PLAT367_ALERT_2_G | Long? C(sp?) - C(sp?) Bond C1M - C4A .           | 1.52 | Ang.         |
| PLAT367_ALERT_2_G | Long? C(sp?) - C(sp?) Bond C1M - C4A_a .         | 1.52 | Ang.         |
| PLAT367_ALERT_2_G | Long? C(sp?) - C(sp?) Bond C1N - C4B .           | 1.51 | Ang.         |
| PLAT367_ALERT_2_G | Long? C(sp?) - C(sp?) Bond C1N - C4B_b .         | 1.51 | Ang.         |
| PLAT720_ALERT_4_G | Number of Unusual/Non-Standard Labels .....      | 10   | Note         |
| PLAT791_ALERT_4_G | Model has Chirality at C11A (Chiral SPGR)        |      | S Verify     |
| PLAT791_ALERT_4_G | Model has Chirality at C11B (Chiral SPGR)        |      | S Verify     |
| PLAT883_ALERT_1_G | No Info/Value for _atom_sites_solution_primary . |      | Please Do !  |
| PLAT909_ALERT_3_G | Percentage of I>2sig(I) Data at Theta(Max) Still | 74%  | Note         |
| PLAT910_ALERT_3_G | Missing # of FCF Reflection(s) Below Theta(Min). | 1    | Note         |
| PLAT933_ALERT_2_G | Number of OMIT Records in Embedded .res File ... | 7    | Note         |
| PLAT978_ALERT_2_G | Number C-C Bonds with Positive Residual Density. | 4    | Info         |

---

0 **ALERT level A** = Most likely a serious problem - resolve or explain  
1 **ALERT level B** = A potentially serious problem, consider carefully  
6 **ALERT level C** = Check. Ensure it is not caused by an omission or oversight  
19 **ALERT level G** = General information/check it is not something unexpected

3 ALERT type 1 CIF construction/syntax error, inconsistent or missing data  
8 ALERT type 2 Indicator that the structure model may be wrong or deficient  
7 ALERT type 3 Indicator that the structure quality may be low  
7 ALERT type 4 Improvement, methodology, query or suggestion  
1 ALERT type 5 Informative message, check

---

It is advisable to attempt to resolve as many as possible of the alerts in all categories. Often the minor alerts point to easily fixed oversights, errors and omissions in your CIF or refinement strategy, so attention to these fine details can be worthwhile. In order to resolve some of the more serious problems it may be necessary to carry out additional measurements or structure refinements. However, the purpose of your study may justify the reported deviations and the more serious of these should normally be commented upon in the discussion or experimental section of a paper or in the "special\_details" fields of the CIF. checkCIF was carefully designed to identify outliers and unusual parameters, but every test has its limitations and alerts that are not important in a particular case may appear. Conversely, the absence of alerts does not guarantee there are no aspects of the results needing attention. It is up to the individual to critically assess their own results and, if necessary, seek expert advice.

### **Publication of your CIF in IUCr journals**

A basic structural check has been run on your CIF. These basic checks will be run on all CIFs submitted for publication in IUCr journals (*Acta Crystallographica*, *Journal of Applied Crystallography*, *Journal of Synchrotron Radiation*); however, if you intend to submit to *Acta Crystallographica Section C* or *E* or *IUCrData*, you should make sure that full publication checks are run on the final version of your CIF prior to submission.

### **Publication of your CIF in other journals**

Please refer to the *Notes for Authors* of the relevant journal for any special instructions relating to CIF submission.

---

**PLATON version of 07/08/2019; check.def file version of 30/07/2019**

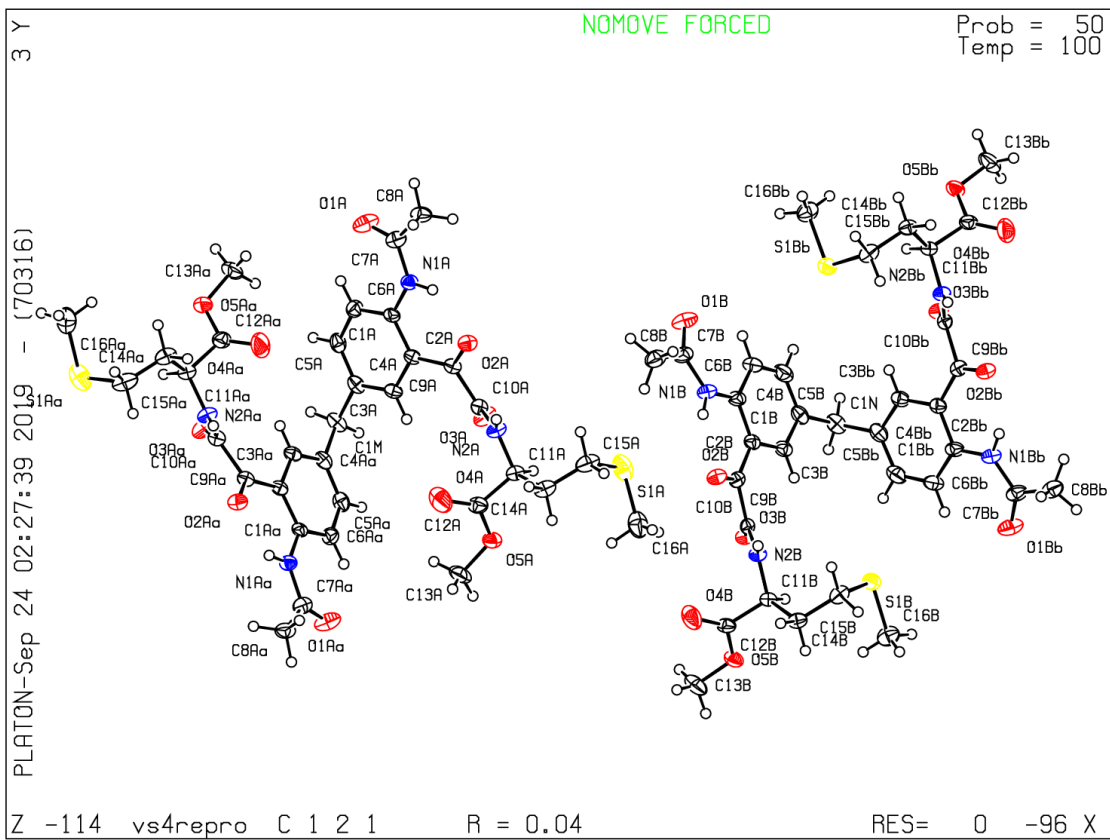

# checkCIF/PLATON report

Structure factors have been supplied for datablock(s) vs5repro

THIS REPORT IS FOR GUIDANCE ONLY. IF USED AS PART OF A REVIEW PROCEDURE FOR PUBLICATION, IT SHOULD NOT REPLACE THE EXPERTISE OF AN EXPERIENCED CRYSTALLOGRAPHIC REFEREE.

No syntax errors found.      CIF dictionary      Interpreting this report

## Datablock: vs5repro

---

|                        |                                |                                  |             |
|------------------------|--------------------------------|----------------------------------|-------------|
| Bond precision:        | C-C = 0.0145 A                 | Wavelength=0.71073               |             |
| Cell:                  | a=32.369(7)                    | b=4.869(1)                       | c=26.474(5) |
|                        | alpha=90                       | beta=127.16(3)                   | gamma=90    |
| Temperature:           | 100 K                          |                                  |             |
|                        | Calculated                     | Reported                         |             |
| Volume                 | 3325.2(18)                     | 3325.3(16)                       |             |
| Space group            | C 2                            | C 1 2 1                          |             |
| Hall group             | C 2y                           | C 2y                             |             |
| Moiety formula         | C33 H34 N4 O10, C33 H38 N4 O10 | C16.5 H19 N2 O5, C16.5 H17 N2 O5 |             |
| Sum formula            | C66 H72 N8 O20                 | C33 H36 N4 O10                   |             |
| Mr                     | 1297.32                        | 648.66                           |             |
| Dx, g cm <sup>-3</sup> | 1.296                          | 1.296                            |             |
| Z                      | 2                              | 4                                |             |
| Mu (mm <sup>-1</sup> ) | 0.097                          | 0.097                            |             |
| F000                   | 1368.0                         | 1368.0                           |             |
| F000'                  | 1368.73                        |                                  |             |
| h, k, lmax             | 36, 5, 30                      | 36, 5, 30                        |             |
| Nref                   | 5143[ 2919]                    | 4904                             |             |
| Tmin, Tmax             | 0.998, 0.999                   |                                  |             |
| Tmin'                  | 0.998                          |                                  |             |

Correction method= Not given

Data completeness= 1.68/0.95      Theta(max)= 23.836

R(reflections)= 0.1237( 4712)      wR2(reflections)= 0.3870( 4904)

S = 2.026

Npar= 384

---

The following ALERTS were generated. Each ALERT has the format  
**test-name\_ALERT\_alert-type\_alert-level.**  
Click on the hyperlinks for more details of the test.

---

**Alert level B**

DIFMN02\_ALERT\_2\_B The minimum difference density is  $< -0.1 \cdot Z_{MAX} \cdot 1.00$   
\_refine\_diff\_density\_min given = -1.141  
Test value = -0.800

THETM01\_ALERT\_3\_B The value of  $\sin(\theta_{max})/\lambda$  is less than 0.575  
Calculated  $\sin(\theta_{max})/\lambda = 0.5686$

**Author Response: All the crystals were ultrathin and could only be measured at Australian synchrotron. Crystals diffracted only to lower values of theta.**

PLAT029\_ALERT\_3\_B \_diffn\_measured\_fraction\_theta\_full value Low . 0.955 Why?

**Author Response: same as above**

PLAT084\_ALERT\_3\_B High wR2 Value (i.e.  $> 0.25$ ) ..... 0.39 Report

**Author Response: As a result of weak diffraction with asymmetric unit containing two molecules with disorders reflecting in higher values of wR2. One of the molecules takes two orientations which are very slightly displaced from each other. The limitation of data (not much of high angle data) and as a result inadequate modelling of disorder resulted in residual densities, low bond precisions and also inability to refine this molecule anisotropically.**

PLAT097\_ALERT\_2\_B Large Reported Max. (Positive) Residual Density 0.96 eA-3

**Author Response: reasons as given above.**

PLAT098\_ALERT\_2\_B Large Reported Min. (Negative) Residual Density -1.14 eA-3

**Author Response: reasons as given above**

PLAT201\_ALERT\_2\_B Isotropic non-H Atoms in Main Residue(s) ..... 4 Report  
C1N C11B C13B C14B

**Author Response: reasons as given above**

PLAT340\_ALERT\_3\_B Low Bond Precision on C-C Bonds ..... 0.0145 Ang.

**Author Response: reasons as given above**

PLAT430\_ALERT\_2\_B Short Inter D...A Contact O3A ..N2A . 2.73 Ang.  
x,1+y,z = 1\_565 Check

PLAT934\_ALERT\_3\_B Number of (Iobs-Icalc)/Sigma(W)  $> 10$  Outliers .. 2 Check

---

## ● Alert level C

DIFMN03\_ALERT\_1\_C The minimum difference density is  $< -0.1 * ZMAX * 0.75$   
The relevant atom site should be identified.

DIFMX02\_ALERT\_1\_C The maximum difference density is  $> 0.1 * ZMAX * 0.75$   
The relevant atom site should be identified.

GOODF01\_ALERT\_2\_C The least squares goodness of fit parameter lies  
outside the range 0.80  $<>$  2.00  
Goodness of fit given = 2.026

STRVA01\_ALERT\_2\_C Chirality of atom sites is inverted?  
From the CIF: `_refine_ls_abs_structure_Flack` 0.900  
From the CIF: `_refine_ls_abs_structure_Flack_su` 0.300

PLAT082\_ALERT\_2\_C High R1 Value ..... 0.12 Report

PLAT087\_ALERT\_2\_C Unsatisfactory S value (Too High) ..... 2.03 Check

PLAT089\_ALERT\_3\_C Poor Data / Parameter Ratio (Zmax < 18) ..... 7.26 Note

PLAT220\_ALERT\_2\_C Non-Solvent Resd 1 C Ueq(max)/Ueq(min) Range 4.6 Ratio

PLAT220\_ALERT\_2\_C Non-Solvent Resd 1 O Ueq(max)/Ueq(min) Range 3.4 Ratio

PLAT222\_ALERT\_3\_C Non-Solv. Resd 1 H Uiso(max)/Uiso(min) Range 4.4 Ratio

PLAT234\_ALERT\_4\_C Large Hirshfeld Difference O5A' --C12A . 0.17 Ang.

PLAT241\_ALERT\_2\_C High 'MainMol' Ueq as Compared to Neighbors of C1N Check

PLAT241\_ALERT\_2\_C High 'MainMol' Ueq as Compared to Neighbors of C11B Check

PLAT242\_ALERT\_2\_C Low 'MainMol' Ueq as Compared to Neighbors of C11A Check

PLAT309\_ALERT\_2\_C Single Bonded Oxygen (C-O > 1.3 Ang) ..... 04" Check

PLAT309\_ALERT\_2\_C Single Bonded Oxygen (C-O > 1.3 Ang) ..... 02AA Check

PLAT329\_ALERT\_4\_C Carbon Atom Hybridisation Unclear for ..... C13B Check

PLAT369\_ALERT\_2\_C Long C(sp2)-C(sp2) Bond C9A - C10A . 1.54 Ang.

PLAT790\_ALERT\_4\_C Centre of Gravity not Within Unit Cell: Resd. # 1 Note  
C33 H34 N4 O10

PLAT907\_ALERT\_2\_C Flack x > 0.5, Structure Needs to be Inverted? . 0.90 Check

PLAT911\_ALERT\_3\_C Missing FCF Refl Between Thmin & STh/L= 0.569 131 Report

PLAT913\_ALERT\_3\_C Missing # of Very Strong Reflections in FCF .... 34 Note

PLAT918\_ALERT\_3\_C Reflection(s) with I(obs) much Smaller I(calc) . 5 Check

PLAT939\_ALERT\_3\_C Large Value of Not (SHELXL) Weight Optimized S . 13.02 Check

## ● Alert level G

PLAT002\_ALERT\_2\_G Number of Distance or Angle Restraints on AtSite 10 Note

PLAT007\_ALERT\_5\_G Number of Unrefined Donor-H Atoms ..... 3 Report

PLAT032\_ALERT\_4\_G Std. Uncertainty on Flack Parameter Value High . 0.300 Report

PLAT042\_ALERT\_1\_G Calc. and Reported MoietyFormula Strings Differ Please Check

PLAT045\_ALERT\_1\_G Calculated and Reported Z Differ by a Factor ... 0.50 Check

PLAT072\_ALERT\_2\_G SHELXL First Parameter in WGHT Unusually Large 0.20 Report

PLAT152\_ALERT\_1\_G The Supplied and Calc. Volume s.u. Differ by ... 2 Units

PLAT171\_ALERT\_4\_G The CIF-Embedded .res File Contains EADP Records 12 Report

PLAT172\_ALERT\_4\_G The CIF-Embedded .res File Contains DFIX Records 1 Report

PLAT176\_ALERT\_4\_G The CIF-Embedded .res File Contains SADI Records 5 Report

PLAT300\_ALERT\_4\_G Atom Site Occupancy of O1" Constrained at 0.5 Check

PLAT300\_ALERT\_4\_G Atom Site Occupancy of O2" Constrained at 0.5 Check

PLAT300\_ALERT\_4\_G Atom Site Occupancy of O3" Constrained at 0.5 Check

PLAT300\_ALERT\_4\_G Atom Site Occupancy of O0AA Constrained at 0.5 Check

PLAT300\_ALERT\_4\_G Atom Site Occupancy of O4" Constrained at 0.5 Check

PLAT300\_ALERT\_4\_G Atom Site Occupancy of O1AA Constrained at 0.5 Check

PLAT300\_ALERT\_4\_G Atom Site Occupancy of O4B Constrained at 0.5 Check

PLAT300\_ALERT\_4\_G Atom Site Occupancy of O5" Constrained at 0.5 Check

PLAT300\_ALERT\_4\_G Atom Site Occupancy of O2AA Constrained at 0.5 Check

PLAT300\_ALERT\_4\_G Atom Site Occupancy of O5B Constrained at 0.5 Check

PLAT300\_ALERT\_4\_G Atom Site Occupancy of N1" Constrained at 0.5 Check

PLAT300\_ALERT\_4\_G Atom Site Occupancy of N0AA Constrained at 0.5 Check

PLAT300\_ALERT\_4\_G Atom Site Occupancy of N2" Constrained at 0.5 Check

PLAT300\_ALERT\_4\_G Atom Site Occupancy of N2B Constrained at 0.5 Check

PLAT300\_ALERT\_4\_G Atom Site Occupancy of C1" Constrained at 0.5 Check

PLAT300\_ALERT\_4\_G Atom Site Occupancy of C1B Constrained at 0.5 Check





|                   |                                                  |                |       |        |
|-------------------|--------------------------------------------------|----------------|-------|--------|
| PLAT300_ALERT_4_G | Atom Site Occupancy of C8                        | Constrained at | 0.5   | Check  |
| PLAT300_ALERT_4_G | Atom Site Occupancy of C13A                      | Constrained at | 0.5   | Check  |
| PLAT300_ALERT_4_G | Atom Site Occupancy of C15'                      | Constrained at | 0.5   | Check  |
| PLAT300_ALERT_4_G | Atom Site Occupancy of C15A                      | Constrained at | 0.5   | Check  |
| PLAT300_ALERT_4_G | Atom Site Occupancy of C16'                      | Constrained at | 0.5   | Check  |
| PLAT300_ALERT_4_G | Atom Site Occupancy of C16A                      | Constrained at | 0.5   | Check  |
| PLAT300_ALERT_4_G | Atom Site Occupancy of H1MA                      | Constrained at | 0.5   | Check  |
| PLAT300_ALERT_4_G | Atom Site Occupancy of H1MB                      | Constrained at | 0.5   | Check  |
| PLAT300_ALERT_4_G | Atom Site Occupancy of H18A                      | Constrained at | 0.5   | Check  |
| PLAT300_ALERT_4_G | Atom Site Occupancy of H8B                       | Constrained at | 0.5   | Check  |
| PLAT300_ALERT_4_G | Atom Site Occupancy of H8C                       | Constrained at | 0.5   | Check  |
| PLAT300_ALERT_4_G | Atom Site Occupancy of H13D                      | Constrained at | 0.5   | Check  |
| PLAT300_ALERT_4_G | Atom Site Occupancy of H13E                      | Constrained at | 0.5   | Check  |
| PLAT300_ALERT_4_G | Atom Site Occupancy of H13F                      | Constrained at | 0.5   | Check  |
| PLAT300_ALERT_4_G | Atom Site Occupancy of H14A                      | Constrained at | 0.5   | Check  |
| PLAT300_ALERT_4_G | Atom Site Occupancy of H14B                      | Constrained at | 0.5   | Check  |
| PLAT300_ALERT_4_G | Atom Site Occupancy of H15G                      | Constrained at | 0.5   | Check  |
| PLAT300_ALERT_4_G | Atom Site Occupancy of H15H                      | Constrained at | 0.5   | Check  |
| PLAT300_ALERT_4_G | Atom Site Occupancy of H15I                      | Constrained at | 0.5   | Check  |
| PLAT300_ALERT_4_G | Atom Site Occupancy of H15J                      | Constrained at | 0.5   | Check  |
| PLAT300_ALERT_4_G | Atom Site Occupancy of H15K                      | Constrained at | 0.5   | Check  |
| PLAT300_ALERT_4_G | Atom Site Occupancy of H15L                      | Constrained at | 0.5   | Check  |
| PLAT300_ALERT_4_G | Atom Site Occupancy of H16G                      | Constrained at | 0.5   | Check  |
| PLAT300_ALERT_4_G | Atom Site Occupancy of H16H                      | Constrained at | 0.5   | Check  |
| PLAT300_ALERT_4_G | Atom Site Occupancy of H16I                      | Constrained at | 0.5   | Check  |
| PLAT300_ALERT_4_G | Atom Site Occupancy of H16J                      | Constrained at | 0.5   | Check  |
| PLAT300_ALERT_4_G | Atom Site Occupancy of H16K                      | Constrained at | 0.5   | Check  |
| PLAT300_ALERT_4_G | Atom Site Occupancy of H16L                      | Constrained at | 0.5   | Check  |
| PLAT301_ALERT_3_G | Main Residue Disorder .....(Resd 1 )             |                | 85%   | Note   |
| PLAT301_ALERT_3_G | Main Residue Disorder .....(Resd 2 )             |                | 21%   | Note   |
| PLAT309_ALERT_2_G | Single Bonded Oxygen (C-O > 1.3 Ang) .....       |                | 02"   | Check  |
| PLAT367_ALERT_2_G | Long? C(sp?)-C(sp?) Bond C11B - C14B .           |                | 1.53  | Ang.   |
| PLAT367_ALERT_2_G | Long? C(sp?)-C(sp?) Bond C1M - C4A .             |                | 1.51  | Ang.   |
| PLAT367_ALERT_2_G | Long? C(sp?)-C(sp?) Bond C1M - C4A_b .           |                | 1.51  | Ang.   |
| PLAT398_ALERT_2_G | Deviating C-O-C Angle From 120 for O5"           |                | 108.1 | Degree |
| PLAT398_ALERT_2_G | Deviating C-O-C Angle From 120 for O5B           |                | 101.3 | Degree |
| PLAT720_ALERT_4_G | Number of Unusual/Non-Standard Labels .....      |                | 22    | Note   |
| PLAT773_ALERT_2_G | Check long C-C Bond in CIF: C11B --C12B          |                | 1.74  | Ang.   |
| PLAT779_ALERT_4_G | Suspect or Irrelevant (Bond) Angle(s) in CIF . # |                | 43    | Check  |
|                   | C4B -C1N -C4" 2.453 1.555 2.453                  |                | 27.50 | Deg.   |
| PLAT790_ALERT_4_G | Centre of Gravity not Within Unit Cell: Resd. #  |                | 2     | Note   |
|                   | C33 H38 N4 O10                                   |                |       |        |
| PLAT811_ALERT_5_G | No ADDSYM Analysis: Too Many Excluded Atoms .... |                | !     | Info   |
| PLAT860_ALERT_3_G | Number of Least-Squares Restraints .....         |                | 4     | Note   |
| PLAT909_ALERT_3_G | Percentage of I>2sig(I) Data at Theta(Max) Still |                | 90%   | Note   |
| PLAT978_ALERT_2_G | Number C-C Bonds with Positive Residual Density. |                | 2     | Info   |

---

0 **ALERT level A** = Most likely a serious problem - resolve or explain  
10 **ALERT level B** = A potentially serious problem, consider carefully  
24 **ALERT level C** = Check. Ensure it is not caused by an omission or oversight  
132 **ALERT level G** = General information/check it is not something unexpected

5 ALERT type 1 CIF construction/syntax error, inconsistent or missing data  
28 ALERT type 2 Indicator that the structure model may be wrong or deficient  
15 ALERT type 3 Indicator that the structure quality may be low  
116 ALERT type 4 Improvement, methodology, query or suggestion  
2 ALERT type 5 Informative message, check

---

## Validation response form

Please find below a validation response form (VRF) that can be filled in and pasted into your CIF.

```
# start Validation Reply Form
_vrf_DIFMN02_vs5repro
;
PROBLEM: The minimum difference density is < -0.1*ZMAX*1.00
RESPONSE: ...
;
_vrf_PLAT430_vs5repro
;
PROBLEM: Short Inter D...A Contact  O3A      ..N2A      .      2.73 Ang.
RESPONSE: ...
;
_vrf_PLAT934_vs5repro
;
PROBLEM: Number of (Iobs-Icalc)/Sigma(W) > 10 Outliers ..      2 Check
RESPONSE: ...
;
# end Validation Reply Form
```

---

It is advisable to attempt to resolve as many as possible of the alerts in all categories. Often the minor alerts point to easily fixed oversights, errors and omissions in your CIF or refinement strategy, so attention to these fine details can be worthwhile. In order to resolve some of the more serious problems it may be necessary to carry out additional measurements or structure refinements. However, the purpose of your study may justify the reported deviations and the more serious of these should normally be commented upon in the discussion or experimental section of a paper or in the "special\_details" fields of the CIF. checkCIF was carefully designed to identify outliers and unusual parameters, but every test has its limitations and alerts that are not important in a particular case may appear. Conversely, the absence of alerts does not guarantee there are no aspects of the results needing attention. It is up to the individual to critically assess their own results and, if necessary, seek expert advice.

### **Publication of your CIF in IUCr journals**

A basic structural check has been run on your CIF. These basic checks will be run on all CIFs submitted for publication in IUCr journals (*Acta Crystallographica*, *Journal of Applied Crystallography*, *Journal of Synchrotron Radiation*); however, if you intend to submit to *Acta Crystallographica Section C* or *E* or *IUCrData*, you should make sure that full publication checks are run on the final version of your CIF prior to submission.

### **Publication of your CIF in other journals**

Please refer to the *Notes for Authors* of the relevant journal for any special instructions relating to CIF submission.

---

**PLATON version of 07/08/2019; check.def file version of 30/07/2019**

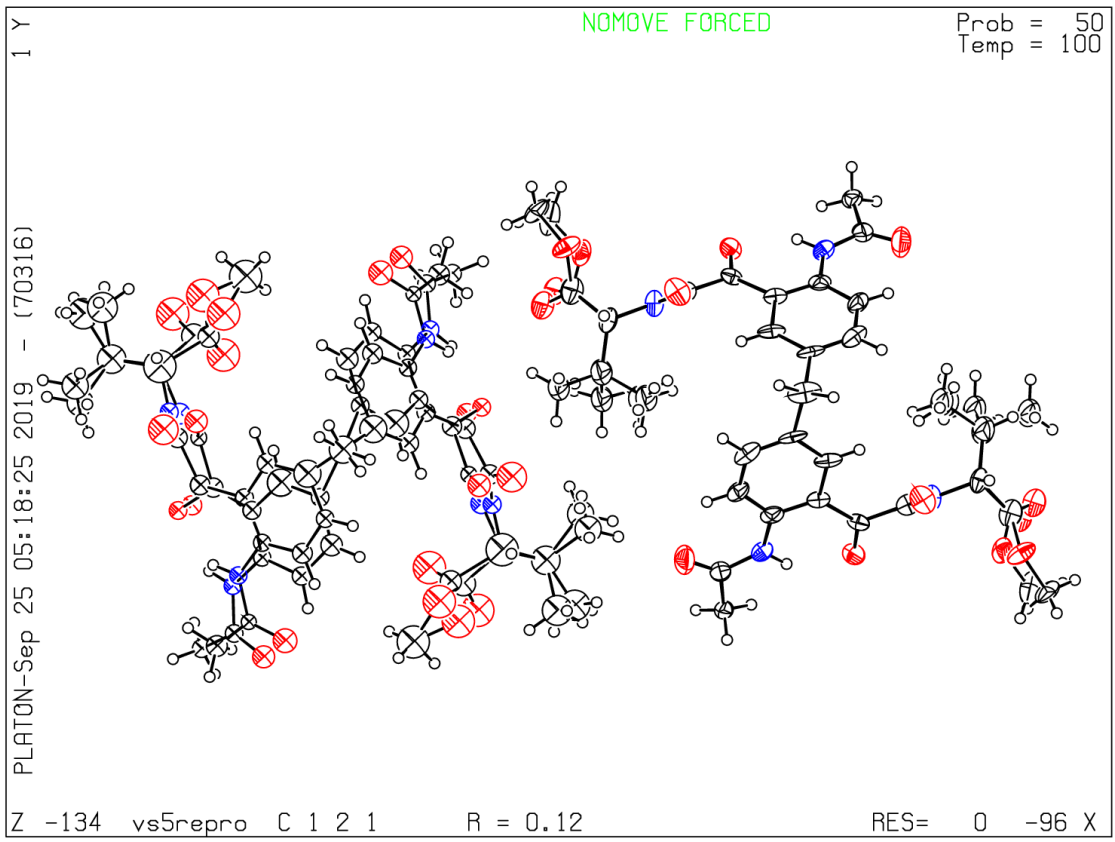

Supplement: s1 [file s1]
